# Supplementary material for: Streptococcus halichoeri: Comparative Genomics of an Emerging Pathogen
Source: Int J Genomics. 2020 Feb 18;2020:8708305. doi: 10.1155/2020/8708305 (PMC7049441; doi:10.1155/2020/8708305)
Supplement: Supplementary 2 — Table S1: the predicted annotations of Streptococcus halichoeri pangenome. [file 8708305.f2.xlsx]

## Sheet: Sheet1
Streptococcus_halichoeri_P408	Streptococcus_halichoeri_P1033	Streptococcus_halichoeri_P1063	Streptococcus_halichoeri_P154	Streptococcus_halichoeri_P376	Streptococcus_halichoeri_P380	Streptococcus_halichoeri_P791	Streptococcus_halichoeri_S157	Streptococcus_halichoeri_S171	Streptococcus_halichoeri_S173	Streptococcus_halichoeri_S185	Streptococcus_halichoeri_S186	Streptococcus_halichoeri_S244	Streptococcus_halichoeri_S258	Streptococcus_halichoeri_k42	Streptococcus_sp_212	Streptococcus_sp_399	Streptococcus_sp_993	Streptococcus_sp_994	Streptococcus_sp_K30
1129,Mobile element protein	1241,Mobile element protein	1230,Mobile element protein	- , -	- , -	1634,Mobile element protein	- , -	1650,Mobile element protein	1662,Mobile element protein	- , -	64,Mobile element protein	- , -	- , -	- , -	1027,Mobile element protein	- , -	1432,Mobile element protein	- , -	- , -	1495,Mobile element protein
63,Oleate hydratase	64,Oleate hydratase	612,Oleate hydratase	1125,Oleate hydratase	1211,Oleate hydratase	1174,Oleate hydratase	740,Oleate hydratase	221,Oleate hydratase	122,Oleate hydratase	51,Oleate hydratase	114,Oleate hydratase	1107,Oleate hydratase	72,Oleate hydratase	590,Oleate hydratase	1649,Oleate hydratase	540,Oleate hydratase	159,Oleate hydratase	1204,Oleate hydratase	1204,Oleate hydratase	1232,Oleate hydratase
64,FIG01114318: hypothetical protein	65,FIG01114318: hypothetical protein	610,FIG01114318: hypothetical protein	1,FIG01114318: hypothetical protein	72,FIG01114318: hypothetical protein	1175,FIG01114318: hypothetical protein	739,FIG01114318: hypothetical protein	223,FIG01114318: hypothetical protein	120,FIG01114318: hypothetical protein	53,FIG01114318: hypothetical protein	116,FIG01114318: hypothetical protein	1,FIG01114318: hypothetical protein	70,FIG01114318: hypothetical protein	591,FIG01114318: hypothetical protein	1650,FIG01114318: hypothetical protein	541,FIG01114318: hypothetical protein	160,FIG01114318: hypothetical protein	208,FIG01114318: hypothetical protein	206,FIG01114318: hypothetical protein	1233,FIG01114318: hypothetical protein
65,Peptide methionine sulfoxide reductase MsrA	66,Peptide methionine sulfoxide reductase MsrA	609,Peptide methionine sulfoxide reductase MsrA	2,Peptide methionine sulfoxide reductase MsrA	73,Peptide methionine sulfoxide reductase MsrA	1176,Peptide methionine sulfoxide reductase MsrA	738,Peptide methionine sulfoxide reductase MsrA	224,Peptide methionine sulfoxide reductase MsrA	119,Peptide methionine sulfoxide reductase MsrA	54,Peptide methionine sulfoxide reductase MsrA	117,Peptide methionine sulfoxide reductase MsrA	2,Peptide methionine sulfoxide reductase MsrA	69,Peptide methionine sulfoxide reductase MsrA	592,Peptide methionine sulfoxide reductase MsrA	1651,Peptide methionine sulfoxide reductase MsrA	542,Peptide methionine sulfoxide reductase MsrA	161,Peptide methionine sulfoxide reductase MsrA	207,Peptide methionine sulfoxide reductase MsrA	205,Peptide methionine sulfoxide reductase MsrA	1234,Peptide methionine sulfoxide reductase MsrA
66,S1 RNA binding domain	67,S1 RNA binding domain	608,S1 RNA binding domain	3,S1 RNA binding domain	74,S1 RNA binding domain	1177,S1 RNA binding domain	737,S1 RNA binding domain	225,S1 RNA binding domain	118,S1 RNA binding domain	55,S1 RNA binding domain	118,S1 RNA binding domain	3,S1 RNA binding domain	68,S1 RNA binding domain	593,S1 RNA binding domain	1652,S1 RNA binding domain	543,S1 RNA binding domain	162,S1 RNA binding domain	206,S1 RNA binding domain	204,S1 RNA binding domain	1235,S1 RNA binding domain
67,Ribosome recycling factor	68,Ribosome recycling factor	607,Ribosome recycling factor	4,Ribosome recycling factor	75,Ribosome recycling factor	1178,Ribosome recycling factor	736,Ribosome recycling factor	226,Ribosome recycling factor	117,Ribosome recycling factor	56,Ribosome recycling factor	119,Ribosome recycling factor	4,Ribosome recycling factor	67,Ribosome recycling factor	594,Ribosome recycling factor	1653,Ribosome recycling factor	544,Ribosome recycling factor	163,Ribosome recycling factor	205,Ribosome recycling factor	203,Ribosome recycling factor	1236,Ribosome recycling factor
68,Uridine monophosphate kinase	69,Uridine monophosphate kinase	606,Uridine monophosphate kinase	5,Uridine monophosphate kinase	76,Uridine monophosphate kinase	1179,Uridine monophosphate kinase	735,Uridine monophosphate kinase	227,Uridine monophosphate kinase	116,Uridine monophosphate kinase	57,Uridine monophosphate kinase	120,Uridine monophosphate kinase	5,Uridine monophosphate kinase	66,Uridine monophosphate kinase	595,Uridine monophosphate kinase	1654,Uridine monophosphate kinase	545,Uridine monophosphate kinase	164,Uridine monophosphate kinase	204,Uridine monophosphate kinase	202,Uridine monophosphate kinase	1237,Uridine monophosphate kinase
69,LSU ribosomal protein L1p (L10Ae)	70,LSU ribosomal protein L1p (L10Ae)	605,LSU ribosomal protein L1p (L10Ae)	6,LSU ribosomal protein L1p (L10Ae)	77,LSU ribosomal protein L1p (L10Ae)	1180,LSU ribosomal protein L1p (L10Ae)	1434,LSU ribosomal protein L1p (L10Ae)	228,LSU ribosomal protein L1p (L10Ae)	115,LSU ribosomal protein L1p (L10Ae)	58,LSU ribosomal protein L1p (L10Ae)	121,LSU ribosomal protein L1p (L10Ae)	6,LSU ribosomal protein L1p (L10Ae)	65,LSU ribosomal protein L1p (L10Ae)	596,LSU ribosomal protein L1p (L10Ae)	1655,LSU ribosomal protein L1p (L10Ae)	546,LSU ribosomal protein L1p (L10Ae)	165,LSU ribosomal protein L1p (L10Ae)	203,LSU ribosomal protein L1p (L10Ae)	201,LSU ribosomal protein L1p (L10Ae)	1238,LSU ribosomal protein L1p (L10Ae)
70,LSU ribosomal protein L11p (L12e)	71,LSU ribosomal protein L11p (L12e)	604,LSU ribosomal protein L11p (L12e)	7,LSU ribosomal protein L11p (L12e)	78,LSU ribosomal protein L11p (L12e)	1181,LSU ribosomal protein L11p (L12e)	1433,LSU ribosomal protein L11p (L12e)	229,LSU ribosomal protein L11p (L12e)	114,LSU ribosomal protein L11p (L12e)	59,LSU ribosomal protein L11p (L12e)	122,LSU ribosomal protein L11p (L12e)	7,LSU ribosomal protein L11p (L12e)	64,LSU ribosomal protein L11p (L12e)	597,LSU ribosomal protein L11p (L12e)	1656,LSU ribosomal protein L11p (L12e)	547,LSU ribosomal protein L11p (L12e)	166,LSU ribosomal protein L11p (L12e)	202,LSU ribosomal protein L11p (L12e)	200,LSU ribosomal protein L11p (L12e)	1239,LSU ribosomal protein L11p (L12e)
71,Mobile element protein	72,Mobile element protein	- , -	- , -	- , -	- , -	- , -	- , -	- , -	- , -	- , -	- , -	- , -	- , -	1657,Mobile element protein	- , -	167,Mobile element protein	- , -	- , -	- , -
72,hypothetical protein	73,hypothetical protein	603,hypothetical protein	8,hypothetical protein	79,hypothetical protein	1182,hypothetical protein	1060,hypothetical protein	387,hypothetical protein	273,hypothetical protein	148,hypothetical protein	227,hypothetical protein	8,hypothetical protein	266,hypothetical protein	598,hypothetical protein	1658,hypothetical protein	548,hypothetical protein	168,hypothetical protein	201,hypothetical protein	199,hypothetical protein	1240,hypothetical protein
73,Integral membrane protein	74,Integral membrane protein	602,Integral membrane protein	9,Integral membrane protein	80,Integral membrane protein	1183,Integral membrane protein	1061,Integral membrane protein	386,Integral membrane protein	272,Integral membrane protein	149,Integral membrane protein	226,Integral membrane protein	9,Integral membrane protein	265,Integral membrane protein	599,Integral membrane protein	1659,Integral membrane protein	549,Integral membrane protein	169,Integral membrane protein	200,Integral membrane protein	198,Integral membrane protein	1169,Integral membrane protein
74,Cell division protein FtsK	75,Cell division protein FtsK	601,Cell division protein FtsK	10,Cell division protein FtsK	81,Cell division protein FtsK	1184,Cell division protein FtsK	1062,Cell division protein FtsK	385,Cell division protein FtsK	271,Cell division protein FtsK	150,Cell division protein FtsK	225,Cell division protein FtsK	10,Cell division protein FtsK	264,Cell division protein FtsK	600,Cell division protein FtsK	1660,Cell division protein FtsK	550,Cell division protein FtsK	170,Cell division protein FtsK	199,Cell division protein FtsK	197,Cell division protein FtsK	1170,Cell division protein FtsK
75,hypothetical protein	76,hypothetical protein	600,hypothetical protein	- , -	- , -	- , -	- , -	- , -	270,hypothetical protein	151,hypothetical protein	224,hypothetical protein	- , -	- , -	601,hypothetical protein	1661,hypothetical protein	551,hypothetical protein	- , -	- , -	- , -	- , -
76,Peptidyl-prolyl cis-trans isomerase	77,Peptidyl-prolyl cis-trans isomerase	599,Peptidyl-prolyl cis-trans isomerase	11,Peptidyl-prolyl cis-trans isomerase	82,Peptidyl-prolyl cis-trans isomerase	1185,Peptidyl-prolyl cis-trans isomerase	1063,Peptidyl-prolyl cis-trans isomerase	384,Peptidyl-prolyl cis-trans isomerase	269,Peptidyl-prolyl cis-trans isomerase	152,Peptidyl-prolyl cis-trans isomerase	223,Peptidyl-prolyl cis-trans isomerase	11,Peptidyl-prolyl cis-trans isomerase	263,Peptidyl-prolyl cis-trans isomerase	602,Peptidyl-prolyl cis-trans isomerase	1662,Peptidyl-prolyl cis-trans isomerase	552,Peptidyl-prolyl cis-trans isomerase	171,Peptidyl-prolyl cis-trans isomerase	198,Peptidyl-prolyl cis-trans isomerase	196,Peptidyl-prolyl cis-trans isomerase	1171,Peptidyl-prolyl cis-trans isomerase
77,Manganese ABC transporter, inner membrane permease protein SitD	78,Manganese ABC transporter, inner membrane permease protein SitD	598,Manganese ABC transporter, inner membrane permease protein SitD	12,Manganese ABC transporter, inner membrane permease protein SitD	83,Manganese ABC transporter, inner membrane permease protein SitD	1186,Manganese ABC transporter, inner membrane permease protein SitD	1064,Manganese ABC transporter, inner membrane permease protein SitD	383,Manganese ABC transporter, inner membrane permease protein SitD	268,Manganese ABC transporter, inner membrane permease protein SitD	153,Manganese ABC transporter, inner membrane permease protein SitD	222,Manganese ABC transporter, inner membrane permease protein SitD	12,Manganese ABC transporter, inner membrane permease protein SitD	262,Manganese ABC transporter, inner membrane permease protein SitD	603,Manganese ABC transporter, inner membrane permease protein SitD	1663,Manganese ABC transporter, inner membrane permease protein SitD	553,Manganese ABC transporter, inner membrane permease protein SitD	172,Manganese ABC transporter, inner membrane permease protein SitD	197,Manganese ABC transporter, inner membrane permease protein SitD	195,Manganese ABC transporter, inner membrane permease protein SitD	1172,Manganese ABC transporter, inner membrane permease protein SitD
78,Manganese ABC transporter, ATP-binding protein SitB	79,Manganese ABC transporter, ATP-binding protein SitB	597,Manganese ABC transporter, ATP-binding protein SitB	13,Manganese ABC transporter, ATP-binding protein SitB	84,Manganese ABC transporter, ATP-binding protein SitB	1187,Manganese ABC transporter, ATP-binding protein SitB	1065,Manganese ABC transporter, ATP-binding protein SitB	382,Manganese ABC transporter, ATP-binding protein SitB	267,Manganese ABC transporter, ATP-binding protein SitB	154,Manganese ABC transporter, ATP-binding protein SitB	221,Manganese ABC transporter, ATP-binding protein SitB	13,Manganese ABC transporter, ATP-binding protein SitB	261,Manganese ABC transporter, ATP-binding protein SitB	604,Manganese ABC transporter, ATP-binding protein SitB	1664,Manganese ABC transporter, ATP-binding protein SitB	554,Manganese ABC transporter, ATP-binding protein SitB	173,Manganese ABC transporter, ATP-binding protein SitB	196,Manganese ABC transporter, ATP-binding protein SitB	194,Manganese ABC transporter, ATP-binding protein SitB	1173,Manganese ABC transporter, ATP-binding protein SitB
79,Manganese ABC transporter, periplasmic-binding protein SitA	80,Manganese ABC transporter, periplasmic-binding protein SitA	596,Manganese ABC transporter, periplasmic-binding protein SitA	14,Manganese ABC transporter, periplasmic-binding protein SitA	85,Manganese ABC transporter, periplasmic-binding protein SitA	1188,Manganese ABC transporter, periplasmic-binding protein SitA	1066,Manganese ABC transporter, periplasmic-binding protein SitA	381,Manganese ABC transporter, periplasmic-binding protein SitA	266,Manganese ABC transporter, periplasmic-binding protein SitA	155,Manganese ABC transporter, periplasmic-binding protein SitA	220,Manganese ABC transporter, periplasmic-binding protein SitA	14,Manganese ABC transporter, periplasmic-binding protein SitA	260,Manganese ABC transporter, periplasmic-binding protein SitA	605,Manganese ABC transporter, periplasmic-binding protein SitA	1665,Manganese ABC transporter, periplasmic-binding protein SitA	555,Manganese ABC transporter, periplasmic-binding protein SitA	174,Manganese ABC transporter, periplasmic-binding protein SitA	195,Manganese ABC transporter, periplasmic-binding protein SitA	193,Manganese ABC transporter, periplasmic-binding protein SitA	1174,Manganese ABC transporter, periplasmic-binding protein SitA
80,Mn-dependent transcriptional regulator MntR	81,Mn-dependent transcriptional regulator MntR	595,Mn-dependent transcriptional regulator MntR	15,Mn-dependent transcriptional regulator MntR	86,Mn-dependent transcriptional regulator MntR	1189,Mn-dependent transcriptional regulator MntR	1067,Mn-dependent transcriptional regulator MntR	380,Mn-dependent transcriptional regulator MntR	265,Mn-dependent transcriptional regulator MntR	156,Mn-dependent transcriptional regulator MntR	219,Mn-dependent transcriptional regulator MntR	15,Mn-dependent transcriptional regulator MntR	259,Mn-dependent transcriptional regulator MntR	606,Mn-dependent transcriptional regulator MntR	1666,Mn-dependent transcriptional regulator MntR	556,Mn-dependent transcriptional regulator MntR	175,Mn-dependent transcriptional regulator MntR	194,Mn-dependent transcriptional regulator MntR	192,Mn-dependent transcriptional regulator MntR	1175,Mn-dependent transcriptional regulator MntR
81,5-methylthioadenosine nucleosidase @ S-adenosylhomocysteine nucleosidase	82,5-methylthioadenosine nucleosidase @ S-adenosylhomocysteine nucleosidase	594,5-methylthioadenosine nucleosidase @ S-adenosylhomocysteine nucleosidase	16,5-methylthioadenosine nucleosidase @ S-adenosylhomocysteine nucleosidase	87,5-methylthioadenosine nucleosidase @ S-adenosylhomocysteine nucleosidase	1190,5-methylthioadenosine nucleosidase @ S-adenosylhomocysteine nucleosidase	1068,5-methylthioadenosine nucleosidase @ S-adenosylhomocysteine nucleosidase	379,5-methylthioadenosine nucleosidase @ S-adenosylhomocysteine nucleosidase	264,5-methylthioadenosine nucleosidase @ S-adenosylhomocysteine nucleosidase	157,5-methylthioadenosine nucleosidase @ S-adenosylhomocysteine nucleosidase	218,5-methylthioadenosine nucleosidase @ S-adenosylhomocysteine nucleosidase	16,5-methylthioadenosine nucleosidase @ S-adenosylhomocysteine nucleosidase	258,5-methylthioadenosine nucleosidase @ S-adenosylhomocysteine nucleosidase	607,5-methylthioadenosine nucleosidase @ S-adenosylhomocysteine nucleosidase	1667,5-methylthioadenosine nucleosidase @ S-adenosylhomocysteine nucleosidase	557,5-methylthioadenosine nucleosidase @ S-adenosylhomocysteine nucleosidase	176,5-methylthioadenosine nucleosidase @ S-adenosylhomocysteine nucleosidase	193,5-methylthioadenosine nucleosidase @ S-adenosylhomocysteine nucleosidase	191,5-methylthioadenosine nucleosidase @ S-adenosylhomocysteine nucleosidase	1176,5-methylthioadenosine nucleosidase @ S-adenosylhomocysteine nucleosidase
82,FIG01115635: hypothetical protein	83,FIG01115635: hypothetical protein	593,FIG01115635: hypothetical protein	17,FIG01115635: hypothetical protein	88,FIG01115635: hypothetical protein	1191,FIG01115635: hypothetical protein	1069,FIG01115635: hypothetical protein	378,FIG01115635: hypothetical protein	263,FIG01115635: hypothetical protein	158,FIG01115635: hypothetical protein	217,FIG01115635: hypothetical protein	17,FIG01115635: hypothetical protein	257,FIG01115635: hypothetical protein	608,FIG01115635: hypothetical protein	1668,FIG01115635: hypothetical protein	558,FIG01115635: hypothetical protein	177,FIG01115635: hypothetical protein	192,FIG01115635: hypothetical protein	190,FIG01115635: hypothetical protein	1177,FIG01115635: hypothetical protein
83,ADP-ribose pyrophosphatase	84,ADP-ribose pyrophosphatase	592,ADP-ribose pyrophosphatase	18,ADP-ribose pyrophosphatase	89,ADP-ribose pyrophosphatase	1192,ADP-ribose pyrophosphatase	1070,ADP-ribose pyrophosphatase	377,ADP-ribose pyrophosphatase	262,ADP-ribose pyrophosphatase	159,ADP-ribose pyrophosphatase	216,ADP-ribose pyrophosphatase	18,ADP-ribose pyrophosphatase	256,ADP-ribose pyrophosphatase	609,ADP-ribose pyrophosphatase	1669,ADP-ribose pyrophosphatase	559,ADP-ribose pyrophosphatase	178,ADP-ribose pyrophosphatase	191,ADP-ribose pyrophosphatase	189,ADP-ribose pyrophosphatase	1178,ADP-ribose pyrophosphatase
84,N-acetylglucosamine-1-phosphate uridyltransferase / Glucosamine-1-phosphate N-acetyltransferase	85,N-acetylglucosamine-1-phosphate uridyltransferase / Glucosamine-1-phosphate N-acetyltransferase	591,N-acetylglucosamine-1-phosphate uridyltransferase / Glucosamine-1-phosphate N-acetyltransferase	19,N-acetylglucosamine-1-phosphate uridyltransferase / Glucosamine-1-phosphate N-acetyltransferase	90,N-acetylglucosamine-1-phosphate uridyltransferase / Glucosamine-1-phosphate N-acetyltransferase	1193,N-acetylglucosamine-1-phosphate uridyltransferase / Glucosamine-1-phosphate N-acetyltransferase	1071,N-acetylglucosamine-1-phosphate uridyltransferase / Glucosamine-1-phosphate N-acetyltransferase	376,N-acetylglucosamine-1-phosphate uridyltransferase / Glucosamine-1-phosphate N-acetyltransferase	261,N-acetylglucosamine-1-phosphate uridyltransferase / Glucosamine-1-phosphate N-acetyltransferase	160,N-acetylglucosamine-1-phosphate uridyltransferase / Glucosamine-1-phosphate N-acetyltransferase	215,N-acetylglucosamine-1-phosphate uridyltransferase / Glucosamine-1-phosphate N-acetyltransferase	19,N-acetylglucosamine-1-phosphate uridyltransferase / Glucosamine-1-phosphate N-acetyltransferase	255,N-acetylglucosamine-1-phosphate uridyltransferase / Glucosamine-1-phosphate N-acetyltransferase	610,N-acetylglucosamine-1-phosphate uridyltransferase / Glucosamine-1-phosphate N-acetyltransferase	1670,N-acetylglucosamine-1-phosphate uridyltransferase / Glucosamine-1-phosphate N-acetyltransferase	560,N-acetylglucosamine-1-phosphate uridyltransferase / Glucosamine-1-phosphate N-acetyltransferase	179,N-acetylglucosamine-1-phosphate uridyltransferase / Glucosamine-1-phosphate N-acetyltransferase	190,N-acetylglucosamine-1-phosphate uridyltransferase / Glucosamine-1-phosphate N-acetyltransferase	188,N-acetylglucosamine-1-phosphate uridyltransferase / Glucosamine-1-phosphate N-acetyltransferase	1179,N-acetylglucosamine-1-phosphate uridyltransferase / Glucosamine-1-phosphate N-acetyltransferase
85,NAD-dependent oxidoreductase	86,NAD-dependent oxidoreductase	590,NAD-dependent oxidoreductase	20,NAD-dependent oxidoreductase	91,NAD-dependent oxidoreductase	1194,NAD-dependent oxidoreductase	1299,NAD-dependent oxidoreductase	375,NAD-dependent oxidoreductase	260,NAD-dependent oxidoreductase	161,NAD-dependent oxidoreductase	214,NAD-dependent oxidoreductase	20,NAD-dependent oxidoreductase	254,NAD-dependent oxidoreductase	611,NAD-dependent oxidoreductase	1671,NAD-dependent oxidoreductase	561,NAD-dependent oxidoreductase	180,NAD-dependent oxidoreductase	189,NAD-dependent oxidoreductase	187,NAD-dependent oxidoreductase	1180,NAD-dependent oxidoreductase
86,FIG01114292: hypothetical protein	87,FIG01114292: hypothetical protein	589,FIG01114292: hypothetical protein	21,FIG01114292: hypothetical protein	92,FIG01114292: hypothetical protein	1195,FIG01114292: hypothetical protein	1298,FIG01114292: hypothetical protein	374,FIG01114292: hypothetical protein	259,FIG01114292: hypothetical protein	162,FIG01114292: hypothetical protein	213,FIG01114292: hypothetical protein	21,FIG01114292: hypothetical protein	253,FIG01114292: hypothetical protein	612,FIG01114292: hypothetical protein	1672,FIG01114292: hypothetical protein	562,FIG01114292: hypothetical protein	181,FIG01114292: hypothetical protein	188,FIG01114292: hypothetical protein	186,FIG01114292: hypothetical protein	1181,FIG01114292: hypothetical protein
87,FIG01114292: hypothetical protein	88,FIG01114292: hypothetical protein	588,FIG01114292: hypothetical protein	22,FIG01114292: hypothetical protein	93,FIG01114292: hypothetical protein	1196,FIG01114292: hypothetical protein	1297,FIG01114292: hypothetical protein	373,FIG01114292: hypothetical protein	258,FIG01114292: hypothetical protein	163,FIG01114292: hypothetical protein	212,FIG01114292: hypothetical protein	22,FIG01114292: hypothetical protein	252,FIG01114292: hypothetical protein	613,FIG01114292: hypothetical protein	1673,FIG01114292: hypothetical protein	563,FIG01114292: hypothetical protein	182,FIG01114292: hypothetical protein	187,FIG01114292: hypothetical protein	185,FIG01114292: hypothetical protein	- , -
88,3-oxoacyl-[acyl-carrier protein] reductase	89,3-oxoacyl-[acyl-carrier protein] reductase	587,3-oxoacyl-[acyl-carrier protein] reductase	23,3-oxoacyl-[acyl-carrier protein] reductase	94,3-oxoacyl-[acyl-carrier protein] reductase	1197,3-oxoacyl-[acyl-carrier protein] reductase	1296,3-oxoacyl-[acyl-carrier protein] reductase	372,3-oxoacyl-[acyl-carrier protein] reductase	257,3-oxoacyl-[acyl-carrier protein] reductase	164,3-oxoacyl-[acyl-carrier protein] reductase	211,3-oxoacyl-[acyl-carrier protein] reductase	23,3-oxoacyl-[acyl-carrier protein] reductase	251,3-oxoacyl-[acyl-carrier protein] reductase	614,3-oxoacyl-[acyl-carrier protein] reductase	1674,3-oxoacyl-[acyl-carrier protein] reductase	564,3-oxoacyl-[acyl-carrier protein] reductase	183,3-oxoacyl-[acyl-carrier protein] reductase	186,3-oxoacyl-[acyl-carrier protein] reductase	184,3-oxoacyl-[acyl-carrier protein] reductase	1182,3-oxoacyl-[acyl-carrier protein] reductase
89,FIG01114304: hypothetical protein	90,FIG01114304: hypothetical protein	586,FIG01114304: hypothetical protein	24,FIG01114304: hypothetical protein	95,FIG01114304: hypothetical protein	1198,FIG01114304: hypothetical protein	1295,FIG01114304: hypothetical protein	371,FIG01114304: hypothetical protein	256,FIG01114304: hypothetical protein	165,FIG01114304: hypothetical protein	210,FIG01114304: hypothetical protein	24,FIG01114304: hypothetical protein	250,FIG01114304: hypothetical protein	615,FIG01114304: hypothetical protein	1675,FIG01114304: hypothetical protein	565,FIG01114304: hypothetical protein	184,FIG01114304: hypothetical protein	185,FIG01114304: hypothetical protein	183,FIG01114304: hypothetical protein	1183,FIG01114304: hypothetical protein
90,hypothetical protein	92,hypothetical protein	584,hypothetical protein	31,hypothetical protein	102,hypothetical protein	- , -	- , -	369,hypothetical protein	254,hypothetical protein	167,hypothetical protein	208,hypothetical protein	31,hypothetical protein	248,hypothetical protein	622,hypothetical protein	1676,hypothetical protein	572,hypothetical protein	186,hypothetical protein	178,hypothetical protein	176,hypothetical protein	921,hypothetical protein
91,FIG01113975: hypothetical protein	93,FIG01113975: hypothetical protein	583,FIG01113975: hypothetical protein	- , -	- , -	- , -	- , -	368,FIG01113975: hypothetical protein	253,FIG01113975: hypothetical protein	168,FIG01113975: hypothetical protein	207,FIG01113975: hypothetical protein	- , -	247,FIG01113975: hypothetical protein	- , -	1677,FIG01113975: hypothetical protein	- , -	187,FIG01113975: hypothetical protein	- , -	- , -	- , -
92,FIG01113975: hypothetical protein	94,FIG01113975: hypothetical protein	582,FIG01113975: hypothetical protein	32,FIG01113975: hypothetical protein	103,FIG01113975: hypothetical protein	1204,FIG01113975: hypothetical protein	- , -	367,FIG01113975: hypothetical protein	252,FIG01113975: hypothetical protein	169,FIG01113975: hypothetical protein	206,FIG01113975: hypothetical protein	32,FIG01113975: hypothetical protein	246,FIG01113975: hypothetical protein	623,FIG01113975: hypothetical protein	1678,FIG01113975: hypothetical protein	573,FIG01113975: hypothetical protein	188,FIG01113975: hypothetical protein	177,FIG01113975: hypothetical protein	175,FIG01113975: hypothetical protein	920,FIG01113975: hypothetical protein
93,hypothetical protein	95,hypothetical protein	581,hypothetical protein	33,hypothetical protein	104,hypothetical protein	1205,hypothetical protein	- , -	366,hypothetical protein	251,hypothetical protein	170,hypothetical protein	205,hypothetical protein	33,hypothetical protein	245,hypothetical protein	624,hypothetical protein	1679,hypothetical protein	574,hypothetical protein	189,hypothetical protein	176,hypothetical protein	174,hypothetical protein	919,hypothetical protein
94,Class B acid phosphatase precursor	96,Class B acid phosphatase precursor	580,Class B acid phosphatase precursor	34,Class B acid phosphatase precursor	105,Class B acid phosphatase precursor	1206,Class B acid phosphatase precursor	682,Class B acid phosphatase precursor	365,Class B acid phosphatase precursor	250,Class B acid phosphatase precursor	171,Class B acid phosphatase precursor	204,Class B acid phosphatase precursor	34,Class B acid phosphatase precursor	244,Class B acid phosphatase precursor	625,Class B acid phosphatase precursor	1680,Class B acid phosphatase precursor	575,Class B acid phosphatase precursor	190,Class B acid phosphatase precursor	175,Class B acid phosphatase precursor	173,Class B acid phosphatase precursor	917,Class B acid phosphatase precursor
95,hypothetical protein	- , -	- , -	- , -	- , -	- , -	- , -	- , -	- , -	- , -	- , -	- , -	- , -	- , -	1681,hypothetical protein	- , -	- , -	- , -	- , -	- , -
96,membrane protein, putative	98,membrane protein, putative	579,membrane protein, putative	35,membrane protein, putative	106,membrane protein, putative	1207,membrane protein, putative	680,membrane protein, putative	364,membrane protein, putative	249,membrane protein, putative	172,membrane protein, putative	203,membrane protein, putative	35,membrane protein, putative	243,membrane protein, putative	627,membrane protein, putative	1682,membrane protein, putative	577,membrane protein, putative	192,membrane protein, putative	174,membrane protein, putative	172,membrane protein, putative	914,membrane protein, putative
97,Methionyl-tRNA synthetase	99,Methionyl-tRNA synthetase	578,Methionyl-tRNA synthetase	36,Methionyl-tRNA synthetase	107,Methionyl-tRNA synthetase	1208,Methionyl-tRNA synthetase	679,Methionyl-tRNA synthetase	363,Methionyl-tRNA synthetase	248,Methionyl-tRNA synthetase	173,Methionyl-tRNA synthetase	202,Methionyl-tRNA synthetase	36,Methionyl-tRNA synthetase	242,Methionyl-tRNA synthetase	628,Methionyl-tRNA synthetase	1683,Methionyl-tRNA synthetase	578,Methionyl-tRNA synthetase	193,Methionyl-tRNA synthetase	173,Methionyl-tRNA synthetase	171,Methionyl-tRNA synthetase	913,Methionyl-tRNA synthetase
98,hypothetical protein	100,hypothetical protein	- , -	- , -	- , -	- , -	- , -	- , -	- , -	- , -	- , -	- , -	- , -	- , -	1684,hypothetical protein	- , -	194,hypothetical protein	- , -	- , -	- , -
99,hypothetical protein	101,hypothetical protein	577,hypothetical protein	- , -	- , -	- , -	- , -	362,hypothetical protein	247,hypothetical protein	174,hypothetical protein	201,hypothetical protein	- , -	241,hypothetical protein	- , -	1685,hypothetical protein	- , -	195,hypothetical protein	- , -	- , -	- , -
100,hypothetical protein	102,hypothetical protein	576,hypothetical protein	- , -	- , -	- , -	- , -	361,hypothetical protein	246,hypothetical protein	175,hypothetical protein	200,hypothetical protein	- , -	240,hypothetical protein	- , -	1686,hypothetical protein	- , -	196,hypothetical protein	- , -	- , -	- , -
101,Phage transcriptional repressor	103,Phage transcriptional repressor	575,Phage transcriptional repressor	141,Phage transcriptional repressor	830,Phage transcriptional repressor	- , -	- , -	360,Phage transcriptional repressor	245,Phage transcriptional repressor	176,Phage transcriptional repressor	199,Phage transcriptional repressor	136,Phage transcriptional repressor	239,Phage transcriptional repressor	- , -	1687,Phage transcriptional repressor	- , -	197,Phage transcriptional repressor	217,Phage transcriptional repressor	215,Phage transcriptional repressor	- , -
102,Putative DNA-binding protein in cluster with Type I restriction-modification system	104,Putative DNA-binding protein in cluster with Type I restriction-modification system	574,Putative DNA-binding protein in cluster with Type I restriction-modification system	- , -	- , -	- , -	- , -	359,Putative DNA-binding protein in cluster with Type I restriction-modification system	244,Putative DNA-binding protein in cluster with Type I restriction-modification system	177,Putative DNA-binding protein in cluster with Type I restriction-modification system	198,Putative DNA-binding protein in cluster with Type I restriction-modification system	- , -	238,Putative DNA-binding protein in cluster with Type I restriction-modification system	- , -	1688,Putative DNA-binding protein in cluster with Type I restriction-modification system	- , -	198,Putative DNA-binding protein in cluster with Type I restriction-modification system	- , -	- , -	- , -
103,Phage integrase	105,Phage integrase	573,Phage integrase	- , -	- , -	568,Phage integrase	- , -	358,Phage integrase	243,Phage integrase	178,Phage integrase	197,Phage integrase	- , -	237,Phage integrase	1472,Phage integrase	1689,Phage integrase	1367,Phage integrase	199,Phage integrase	- , -	- , -	- , -
104,Exodeoxyribonuclease III	106,Exodeoxyribonuclease III	572,Exodeoxyribonuclease III	37,Exodeoxyribonuclease III	108,Exodeoxyribonuclease III	1209,Exodeoxyribonuclease III	678,Exodeoxyribonuclease III	357,Exodeoxyribonuclease III	242,Exodeoxyribonuclease III	179,Exodeoxyribonuclease III	196,Exodeoxyribonuclease III	37,Exodeoxyribonuclease III	236,Exodeoxyribonuclease III	629,Exodeoxyribonuclease III	1690,Exodeoxyribonuclease III	579,Exodeoxyribonuclease III	200,Exodeoxyribonuclease III	172,Exodeoxyribonuclease III	170,Exodeoxyribonuclease III	912,Exodeoxyribonuclease III
105,Glyoxalase family protein	107,Glyoxalase family protein	571,Glyoxalase family protein	38,Lactoylglutathione lyase and related lyases	109,Lactoylglutathione lyase and related lyases	1210,Glyoxalase family protein	677,Glyoxalase family protein	356,Glyoxalase family protein	241,Glyoxalase family protein	180,Glyoxalase family protein	195,Glyoxalase family protein	38,Lactoylglutathione lyase and related lyases	235,Glyoxalase family protein	630,Glyoxalase family protein	1691,Glyoxalase family protein	580,Glyoxalase family protein	201,Glyoxalase family protein	171,Lactoylglutathione lyase and related lyases	169,Lactoylglutathione lyase and related lyases	911,Lactoylglutathione lyase and related lyases
106,PhnB protein	108,PhnB protein	570,PhnB protein	39,PhnB protein	110,PhnB protein	1211,PhnB protein	676,PhnB protein	355,PhnB protein	240,PhnB protein	181,PhnB protein	194,PhnB protein	39,PhnB protein	234,PhnB protein	631,PhnB protein	1692,PhnB protein	581,PhnB protein	202,PhnB protein	170,PhnB protein	168,PhnB protein	910,PhnB protein
107,Arsenate reductase	109,Arsenate reductase	569,Arsenate reductase	40,Arsenate reductase	111,Arsenate reductase	1212,Arsenate reductase	675,Arsenate reductase	354,Arsenate reductase	239,Arsenate reductase	182,Arsenate reductase	193,Arsenate reductase	40,Arsenate reductase	233,Arsenate reductase	632,Arsenate reductase	1693,Arsenate reductase	582,Arsenate reductase	203,Arsenate reductase	169,Arsenate reductase	167,Arsenate reductase	909,Arsenate reductase
108,Methylated-DNA--protein-cysteine methyltransferase	110,Methylated-DNA--protein-cysteine methyltransferase	568,Methylated-DNA--protein-cysteine methyltransferase	41,Methylated-DNA--protein-cysteine methyltransferase	112,Methylated-DNA--protein-cysteine methyltransferase	1213,Methylated-DNA--protein-cysteine methyltransferase	674,Methylated-DNA--protein-cysteine methyltransferase	353,Methylated-DNA--protein-cysteine methyltransferase	238,Methylated-DNA--protein-cysteine methyltransferase	183,Methylated-DNA--protein-cysteine methyltransferase	192,Methylated-DNA--protein-cysteine methyltransferase	41,Methylated-DNA--protein-cysteine methyltransferase	232,Methylated-DNA--protein-cysteine methyltransferase	633,Methylated-DNA--protein-cysteine methyltransferase	1694,Methylated-DNA--protein-cysteine methyltransferase	583,Methylated-DNA--protein-cysteine methyltransferase	204,Methylated-DNA--protein-cysteine methyltransferase	168,Methylated-DNA--protein-cysteine methyltransferase	166,Methylated-DNA--protein-cysteine methyltransferase	908,Methylated-DNA--protein-cysteine methyltransferase
109,PhnO protein	111,PhnO protein	567,PhnO protein	42,PhnO protein	113,PhnO protein	1214,PhnO protein	673,PhnO protein	352,PhnO protein	237,PhnO protein	184,PhnO protein	191,PhnO protein	42,PhnO protein	231,PhnO protein	634,PhnO protein	1695,PhnO protein	584,PhnO protein	205,PhnO protein	167,PhnO protein	165,PhnO protein	907,PhnO protein
110,PhnO protein	112,PhnO protein	- , -	- , -	- , -	- , -	- , -	- , -	- , -	- , -	- , -	- , -	- , -	- , -	1696,PhnO protein	- , -	206,PhnO protein	- , -	- , -	- , -
111,hypothetical protein	113,hypothetical protein	566,hypothetical protein	43,hypothetical protein	114,hypothetical protein	- , -	672,hypothetical protein	- , -	236,hypothetical protein	185,hypothetical protein	190,hypothetical protein	43,hypothetical protein	- , -	- , -	1697,hypothetical protein	- , -	207,hypothetical protein	166,hypothetical protein	164,hypothetical protein	906,hypothetical protein
112,Cytoplasmic copper homeostasis protein cutC	114,Cytoplasmic copper homeostasis protein cutC	565,Cytoplasmic copper homeostasis protein cutC	44,Cytoplasmic copper homeostasis protein cutC	115,Cytoplasmic copper homeostasis protein cutC	1215,Cytoplasmic copper homeostasis protein cutC	671,Cytoplasmic copper homeostasis protein cutC	351,Cytoplasmic copper homeostasis protein cutC	235,Cytoplasmic copper homeostasis protein cutC	186,Cytoplasmic copper homeostasis protein cutC	189,Cytoplasmic copper homeostasis protein cutC	44,Cytoplasmic copper homeostasis protein cutC	230,Cytoplasmic copper homeostasis protein cutC	635,Cytoplasmic copper homeostasis protein cutC	1698,Cytoplasmic copper homeostasis protein cutC	585,Cytoplasmic copper homeostasis protein cutC	208,Cytoplasmic copper homeostasis protein cutC	165,Cytoplasmic copper homeostasis protein cutC	163,Cytoplasmic copper homeostasis protein cutC	905,Cytoplasmic copper homeostasis protein cutC
113,rRNA small subunit methyltransferase I	115,rRNA small subunit methyltransferase I	564,rRNA small subunit methyltransferase I	45,rRNA small subunit methyltransferase I	116,rRNA small subunit methyltransferase I	1216,rRNA small subunit methyltransferase I	670,rRNA small subunit methyltransferase I	350,rRNA small subunit methyltransferase I	234,rRNA small subunit methyltransferase I	187,rRNA small subunit methyltransferase I	188,rRNA small subunit methyltransferase I	45,rRNA small subunit methyltransferase I	229,rRNA small subunit methyltransferase I	636,rRNA small subunit methyltransferase I	1699,rRNA small subunit methyltransferase I	586,rRNA small subunit methyltransferase I	209,rRNA small subunit methyltransferase I	164,rRNA small subunit methyltransferase I	162,rRNA small subunit methyltransferase I	904,rRNA small subunit methyltransferase I
114,DNA replication intiation control protein YabA	116,DNA replication intiation control protein YabA	563,DNA replication intiation control protein YabA	46,DNA replication intiation control protein YabA	117,DNA replication intiation control protein YabA	1217,DNA replication intiation control protein YabA	669,DNA replication intiation control protein YabA	349,DNA replication intiation control protein YabA	233,DNA replication intiation control protein YabA	188,DNA replication intiation control protein YabA	187,DNA replication intiation control protein YabA	46,DNA replication intiation control protein YabA	228,DNA replication intiation control protein YabA	637,DNA replication intiation control protein YabA	1700,DNA replication intiation control protein YabA	587,DNA replication intiation control protein YabA	210,DNA replication intiation control protein YabA	163,DNA replication intiation control protein YabA	161,DNA replication intiation control protein YabA	903,DNA replication intiation control protein YabA
115,Signal peptidase-like protein	117,Signal peptidase-like protein	562,Signal peptidase-like protein	47,Signal peptidase-like protein	118,Signal peptidase-like protein	1218,Signal peptidase-like protein	668,Signal peptidase-like protein	348,Signal peptidase-like protein	232,Signal peptidase-like protein	189,Signal peptidase-like protein	186,Signal peptidase-like protein	47,Signal peptidase-like protein	227,Signal peptidase-like protein	638,Signal peptidase-like protein	1701,Signal peptidase-like protein	588,Signal peptidase-like protein	211,Signal peptidase-like protein	162,Signal peptidase-like protein	160,Signal peptidase-like protein	902,Signal peptidase-like protein
116,DNA polymerase III delta prime subunit	118,DNA polymerase III delta prime subunit	561,DNA polymerase III delta prime subunit	48,DNA polymerase III delta prime subunit	119,DNA polymerase III delta prime subunit	1219,DNA polymerase III delta prime subunit	667,DNA polymerase III delta prime subunit	347,DNA polymerase III delta prime subunit	231,DNA polymerase III delta prime subunit	190,DNA polymerase III delta prime subunit	185,DNA polymerase III delta prime subunit	48,DNA polymerase III delta prime subunit	226,DNA polymerase III delta prime subunit	639,DNA polymerase III delta prime subunit	1702,DNA polymerase III delta prime subunit	589,DNA polymerase III delta prime subunit	212,DNA polymerase III delta prime subunit	161,DNA polymerase III delta prime subunit	159,DNA polymerase III delta prime subunit	901,DNA polymerase III delta prime subunit
117,Thymidylate kinase	119,Thymidylate kinase	560,Thymidylate kinase	49,Thymidylate kinase	120,Thymidylate kinase	1220,Thymidylate kinase	666,Thymidylate kinase	346,Thymidylate kinase	230,Thymidylate kinase	191,Thymidylate kinase	184,Thymidylate kinase	49,Thymidylate kinase	225,Thymidylate kinase	640,Thymidylate kinase	1703,Thymidylate kinase	590,Thymidylate kinase	213,Thymidylate kinase	160,Thymidylate kinase	158,Thymidylate kinase	900,Thymidylate kinase
118,hypothetical protein	120,hypothetical protein	559,hypothetical protein	50,hypothetical protein	121,hypothetical protein	1221,hypothetical protein	665,hypothetical protein	345,hypothetical protein	229,hypothetical protein	192,hypothetical protein	183,hypothetical protein	50,hypothetical protein	224,hypothetical protein	641,hypothetical protein	1704,hypothetical protein	591,hypothetical protein	214,hypothetical protein	159,hypothetical protein	157,hypothetical protein	899,hypothetical protein
119,hypothetical protein	121,hypothetical protein	558,ComK regulator	51,ComK regulator	122,ComK regulator	1222,ComK regulator	664,ComK regulator	344,ComK regulator	228,ComK regulator	193,ComK regulator	182,ComK regulator	51,ComK regulator	223,ComK regulator	642,ComK regulator	1705,hypothetical protein	592,ComK regulator	215,hypothetical protein	158,ComK regulator	156,ComK regulator	898,ComK regulator
120,ATP-dependent Clp protease proteolytic subunit	122,ATP-dependent Clp protease proteolytic subunit	557,ATP-dependent Clp protease proteolytic subunit	52,ATP-dependent Clp protease proteolytic subunit	123,ATP-dependent Clp protease proteolytic subunit	1223,ATP-dependent Clp protease proteolytic subunit	663,ATP-dependent Clp protease proteolytic subunit	343,ATP-dependent Clp protease proteolytic subunit	227,ATP-dependent Clp protease proteolytic subunit	194,ATP-dependent Clp protease proteolytic subunit	181,ATP-dependent Clp protease proteolytic subunit	52,ATP-dependent Clp protease proteolytic subunit	222,ATP-dependent Clp protease proteolytic subunit	643,ATP-dependent Clp protease proteolytic subunit	1706,ATP-dependent Clp protease proteolytic subunit	593,ATP-dependent Clp protease proteolytic subunit	216,ATP-dependent Clp protease proteolytic subunit	157,ATP-dependent Clp protease proteolytic subunit	155,ATP-dependent Clp protease proteolytic subunit	897,ATP-dependent Clp protease proteolytic subunit
121,Uracil phosphoribosyltransferase	123,Uracil phosphoribosyltransferase	556,Uracil phosphoribosyltransferase	53,Uracil phosphoribosyltransferase	124,Uracil phosphoribosyltransferase	1224,Uracil phosphoribosyltransferase	662,Uracil phosphoribosyltransferase	342,Uracil phosphoribosyltransferase	226,Uracil phosphoribosyltransferase	195,Uracil phosphoribosyltransferase	180,Uracil phosphoribosyltransferase	53,Uracil phosphoribosyltransferase	221,Uracil phosphoribosyltransferase	644,Uracil phosphoribosyltransferase	1707,Uracil phosphoribosyltransferase	594,Uracil phosphoribosyltransferase	217,Uracil phosphoribosyltransferase	156,Uracil phosphoribosyltransferase	154,Uracil phosphoribosyltransferase	896,Uracil phosphoribosyltransferase
122,Membrane protein involved in the export of O-antigen, teichoic acid lipoteichoic acids	124,Membrane protein involved in the export of O-antigen, teichoic acid lipoteichoic acids	555,Membrane protein involved in the export of O-antigen, teichoic acid lipoteichoic acids	54,Membrane protein involved in the export of O-antigen, teichoic acid lipoteichoic acids	125,Membrane protein involved in the export of O-antigen, teichoic acid lipoteichoic acids	1225,Membrane protein involved in the export of O-antigen, teichoic acid lipoteichoic acids	661,Membrane protein involved in the export of O-antigen, teichoic acid lipoteichoic acids	341,Membrane protein involved in the export of O-antigen, teichoic acid lipoteichoic acids	225,Membrane protein involved in the export of O-antigen, teichoic acid lipoteichoic acids	196,Membrane protein involved in the export of O-antigen, teichoic acid lipoteichoic acids	179,Membrane protein involved in the export of O-antigen, teichoic acid lipoteichoic acids	54,Membrane protein involved in the export of O-antigen, teichoic acid lipoteichoic acids	220,Membrane protein involved in the export of O-antigen, teichoic acid lipoteichoic acids	645,Membrane protein involved in the export of O-antigen, teichoic acid lipoteichoic acids	1708,Membrane protein involved in the export of O-antigen, teichoic acid lipoteichoic acids	595,Membrane protein involved in the export of O-antigen, teichoic acid lipoteichoic acids	218,Membrane protein involved in the export of O-antigen, teichoic acid lipoteichoic acids	155,Membrane protein involved in the export of O-antigen, teichoic acid lipoteichoic acids	153,Membrane protein involved in the export of O-antigen, teichoic acid lipoteichoic acids	895,Membrane protein involved in the export of O-antigen, teichoic acid lipoteichoic acids
123,UDP-N-acetylmuramoylalanyl-D-glutamate--L- lysine ligase	125,UDP-N-acetylmuramoylalanyl-D-glutamate--L- lysine ligase	554,UDP-N-acetylmuramoylalanyl-D-glutamate--L- lysine ligase	55,UDP-N-acetylmuramoylalanyl-D-glutamate--L- lysine ligase	126,UDP-N-acetylmuramoylalanyl-D-glutamate--L- lysine ligase	1226,UDP-N-acetylmuramoylalanyl-D-glutamate--L- lysine ligase	660,UDP-N-acetylmuramoylalanyl-D-glutamate--L- lysine ligase	340,UDP-N-acetylmuramoylalanyl-D-glutamate--L- lysine ligase	224,UDP-N-acetylmuramoylalanyl-D-glutamate--L- lysine ligase	197,UDP-N-acetylmuramoylalanyl-D-glutamate--L- lysine ligase	178,UDP-N-acetylmuramoylalanyl-D-glutamate--L- lysine ligase	55,UDP-N-acetylmuramoylalanyl-D-glutamate--L- lysine ligase	219,UDP-N-acetylmuramoylalanyl-D-glutamate--L- lysine ligase	646,UDP-N-acetylmuramoylalanyl-D-glutamate--L- lysine ligase	1709,UDP-N-acetylmuramoylalanyl-D-glutamate--L- lysine ligase	596,UDP-N-acetylmuramoylalanyl-D-glutamate--L- lysine ligase	219,UDP-N-acetylmuramoylalanyl-D-glutamate--L- lysine ligase	154,UDP-N-acetylmuramoylalanyl-D-glutamate--L- lysine ligase	152,UDP-N-acetylmuramoylalanyl-D-glutamate--L- lysine ligase	894,UDP-N-acetylmuramoylalanyl-D-glutamate--L- lysine ligase
124,FIG01114725: hypothetical protein	126,FIG01114725: hypothetical protein	553,FIG01114725: hypothetical protein	56,FIG01114725: hypothetical protein	127,FIG01114725: hypothetical protein	1227,FIG01114725: hypothetical protein	659,FIG01114725: hypothetical protein	339,FIG01114725: hypothetical protein	223,FIG01114725: hypothetical protein	198,FIG01114725: hypothetical protein	177,FIG01114725: hypothetical protein	56,FIG01114725: hypothetical protein	218,FIG01114725: hypothetical protein	647,hypothetical protein	1710,FIG01114725: hypothetical protein	597,hypothetical protein	220,FIG01114725: hypothetical protein	153,FIG01114725: hypothetical protein	151,FIG01114725: hypothetical protein	893,FIG01114725: hypothetical protein
125,hypothetical protein	127,hypothetical protein	- , -	- , -	- , -	- , -	- , -	- , -	- , -	- , -	- , -	- , -	- , -	- , -	1711,hypothetical protein	- , -	221,hypothetical protein	- , -	- , -	- , -
126,Manganese-dependent inorganic pyrophosphatase	128,Manganese-dependent inorganic pyrophosphatase	552,Manganese-dependent inorganic pyrophosphatase	57,Manganese-dependent inorganic pyrophosphatase	128,Manganese-dependent inorganic pyrophosphatase	1228,Manganese-dependent inorganic pyrophosphatase	658,Manganese-dependent inorganic pyrophosphatase	338,Manganese-dependent inorganic pyrophosphatase	222,Manganese-dependent inorganic pyrophosphatase	199,Manganese-dependent inorganic pyrophosphatase	176,Manganese-dependent inorganic pyrophosphatase	57,Manganese-dependent inorganic pyrophosphatase	217,Manganese-dependent inorganic pyrophosphatase	648,Manganese-dependent inorganic pyrophosphatase	1712,Manganese-dependent inorganic pyrophosphatase	598,Manganese-dependent inorganic pyrophosphatase	222,Manganese-dependent inorganic pyrophosphatase	152,Manganese-dependent inorganic pyrophosphatase	150,Manganese-dependent inorganic pyrophosphatase	892,Manganese-dependent inorganic pyrophosphatase
127,Pyruvate formate-lyase activating enzyme	129,Pyruvate formate-lyase activating enzyme	551,Pyruvate formate-lyase activating enzyme	58,Pyruvate formate-lyase activating enzyme	129,Pyruvate formate-lyase activating enzyme	1229,Pyruvate formate-lyase activating enzyme	657,Pyruvate formate-lyase activating enzyme	337,Pyruvate formate-lyase activating enzyme	221,Pyruvate formate-lyase activating enzyme	200,Pyruvate formate-lyase activating enzyme	175,Pyruvate formate-lyase activating enzyme	58,Pyruvate formate-lyase activating enzyme	216,Pyruvate formate-lyase activating enzyme	649,Pyruvate formate-lyase activating enzyme	1713,Pyruvate formate-lyase activating enzyme	599,Pyruvate formate-lyase activating enzyme	223,Pyruvate formate-lyase activating enzyme	151,Pyruvate formate-lyase activating enzyme	149,Pyruvate formate-lyase activating enzyme	891,Pyruvate formate-lyase activating enzyme
128,Magnesium and cobalt efflux protein CorC	130,Magnesium and cobalt efflux protein CorC	550,Magnesium and cobalt efflux protein CorC	59,Magnesium and cobalt efflux protein CorC	130,Magnesium and cobalt efflux protein CorC	1230,Magnesium and cobalt efflux protein CorC	656,Magnesium and cobalt efflux protein CorC	336,Magnesium and cobalt efflux protein CorC	220,Magnesium and cobalt efflux protein CorC	201,Magnesium and cobalt efflux protein CorC	174,Magnesium and cobalt efflux protein CorC	59,Magnesium and cobalt efflux protein CorC	215,Magnesium and cobalt efflux protein CorC	650,Magnesium and cobalt efflux protein CorC	1714,Magnesium and cobalt efflux protein CorC	600,Magnesium and cobalt efflux protein CorC	224,Magnesium and cobalt efflux protein CorC	150,Magnesium and cobalt efflux protein CorC	148,Magnesium and cobalt efflux protein CorC	890,Magnesium and cobalt efflux protein CorC
129,SAM-dependent methyltransferase, MraW methylase family	131,SAM-dependent methyltransferase, MraW methylase family	549,SAM-dependent methyltransferase, MraW methylase family	60,SAM-dependent methyltransferase, MraW methylase family	131,SAM-dependent methyltransferase, MraW methylase family	1231,SAM-dependent methyltransferase, MraW methylase family	655,SAM-dependent methyltransferase, MraW methylase family	335,SAM-dependent methyltransferase, MraW methylase family	219,SAM-dependent methyltransferase, MraW methylase family	202,SAM-dependent methyltransferase, MraW methylase family	173,SAM-dependent methyltransferase, MraW methylase family	60,SAM-dependent methyltransferase, MraW methylase family	214,SAM-dependent methyltransferase, MraW methylase family	651,SAM-dependent methyltransferase, MraW methylase family	1715,SAM-dependent methyltransferase, MraW methylase family	601,SAM-dependent methyltransferase, MraW methylase family	225,SAM-dependent methyltransferase, MraW methylase family	149,SAM-dependent methyltransferase, MraW methylase family	147,SAM-dependent methyltransferase, MraW methylase family	411,SAM-dependent methyltransferase, MraW methylase family
130,COG1242: Predicted Fe-S oxidoreductase	132,COG1242: Predicted Fe-S oxidoreductase	547,COG1242: Predicted Fe-S oxidoreductase	62,COG1242: Predicted Fe-S oxidoreductase	133,COG1242: Predicted Fe-S oxidoreductase	1233,COG1242: Predicted Fe-S oxidoreductase	653,COG1242: Predicted Fe-S oxidoreductase	333,COG1242: Predicted Fe-S oxidoreductase	217,COG1242: Predicted Fe-S oxidoreductase	204,COG1242: Predicted Fe-S oxidoreductase	171,COG1242: Predicted Fe-S oxidoreductase	62,COG1242: Predicted Fe-S oxidoreductase	212,COG1242: Predicted Fe-S oxidoreductase	653,COG1242: Predicted Fe-S oxidoreductase	1716,COG1242: Predicted Fe-S oxidoreductase	603,COG1242: Predicted Fe-S oxidoreductase	226,COG1242: Predicted Fe-S oxidoreductase	147,COG1242: Predicted Fe-S oxidoreductase	145,COG1242: Predicted Fe-S oxidoreductase	409,COG1242: Predicted Fe-S oxidoreductase
131,Membrane-associated phospholipid phosphatase	133,Membrane-associated phospholipid phosphatase	546,Membrane-associated phospholipid phosphatase	63,Membrane-associated phospholipid phosphatase	134,Membrane-associated phospholipid phosphatase	1234,Membrane-associated phospholipid phosphatase	652,Membrane-associated phospholipid phosphatase	332,Membrane-associated phospholipid phosphatase	216,Membrane-associated phospholipid phosphatase	205,Membrane-associated phospholipid phosphatase	170,Membrane-associated phospholipid phosphatase	63,Membrane-associated phospholipid phosphatase	211,Membrane-associated phospholipid phosphatase	654,Membrane-associated phospholipid phosphatase	1717,Membrane-associated phospholipid phosphatase	604,Membrane-associated phospholipid phosphatase	227,Membrane-associated phospholipid phosphatase	146,Membrane-associated phospholipid phosphatase	144,Membrane-associated phospholipid phosphatase	408,Membrane-associated phospholipid phosphatase
132,Substrate-specific component RibU of riboflavin ECF transporter	134,Substrate-specific component RibU of riboflavin ECF transporter	545,Substrate-specific component RibU of riboflavin ECF transporter	64,Substrate-specific component RibU of riboflavin ECF transporter	135,Substrate-specific component RibU of riboflavin ECF transporter	1235,Substrate-specific component RibU of riboflavin ECF transporter	651,Substrate-specific component RibU of riboflavin ECF transporter	331,Substrate-specific component RibU of riboflavin ECF transporter	215,Substrate-specific component RibU of riboflavin ECF transporter	206,Substrate-specific component RibU of riboflavin ECF transporter	169,Substrate-specific component RibU of riboflavin ECF transporter	64,Substrate-specific component RibU of riboflavin ECF transporter	210,Substrate-specific component RibU of riboflavin ECF transporter	655,Substrate-specific component RibU of riboflavin ECF transporter	1718,Substrate-specific component RibU of riboflavin ECF transporter	605,Substrate-specific component RibU of riboflavin ECF transporter	228,Substrate-specific component RibU of riboflavin ECF transporter	145,Substrate-specific component RibU of riboflavin ECF transporter	143,Substrate-specific component RibU of riboflavin ECF transporter	407,Substrate-specific component RibU of riboflavin ECF transporter
133,tRNA (cytidine(34)-2-O)-methyltransferase	135,tRNA (cytidine(34)-2-O)-methyltransferase	544,tRNA (cytidine(34)-2-O)-methyltransferase	65,tRNA (cytidine(34)-2-O)-methyltransferase	136,tRNA (cytidine(34)-2-O)-methyltransferase	1236,tRNA (cytidine(34)-2-O)-methyltransferase	650,tRNA (cytidine(34)-2-O)-methyltransferase	330,tRNA (cytidine(34)-2-O)-methyltransferase	214,tRNA (cytidine(34)-2-O)-methyltransferase	207,tRNA (cytidine(34)-2-O)-methyltransferase	168,tRNA (cytidine(34)-2-O)-methyltransferase	65,tRNA (cytidine(34)-2-O)-methyltransferase	209,tRNA (cytidine(34)-2-O)-methyltransferase	656,tRNA (cytidine(34)-2-O)-methyltransferase	1719,tRNA (cytidine(34)-2-O)-methyltransferase	606,tRNA (cytidine(34)-2-O)-methyltransferase	229,tRNA (cytidine(34)-2-O)-methyltransferase	144,tRNA (cytidine(34)-2-O)-methyltransferase	142,tRNA (cytidine(34)-2-O)-methyltransferase	406,tRNA (cytidine(34)-2-O)-methyltransferase
134,hypothetical protein	136,hypothetical protein	543,hypothetical protein	66,hypothetical protein	137,hypothetical protein	1237,hypothetical protein	649,hypothetical protein	1349,hypothetical protein	898,hypothetical protein	648,hypothetical protein	473,hypothetical protein	66,hypothetical protein	471,hypothetical protein	657,hypothetical protein	1720,hypothetical protein	607,hypothetical protein	230,hypothetical protein	143,hypothetical protein	141,hypothetical protein	405,hypothetical protein
135,Protein YidD	137,Protein YidD	542,Protein YidD	67,Protein YidD	138,Protein YidD	1238,Protein YidD	648,Protein YidD	1348,Protein YidD	899,Protein YidD	647,Protein YidD	474,Protein YidD	67,Protein YidD	472,Protein YidD	658,Protein YidD	1721,Protein YidD	608,Protein YidD	231,Protein YidD	142,Protein YidD	140,Protein YidD	404,Protein YidD
136,Ribosomal large subunit pseudouridine synthase B	138,Ribosomal large subunit pseudouridine synthase B	541,Ribosomal large subunit pseudouridine synthase B	68,Ribosomal large subunit pseudouridine synthase B	139,Ribosomal large subunit pseudouridine synthase B	1239,Ribosomal large subunit pseudouridine synthase B	647,Ribosomal large subunit pseudouridine synthase B	1347,Ribosomal large subunit pseudouridine synthase B	900,Ribosomal large subunit pseudouridine synthase B	646,Ribosomal large subunit pseudouridine synthase B	475,Ribosomal large subunit pseudouridine synthase B	68,Ribosomal large subunit pseudouridine synthase B	473,Ribosomal large subunit pseudouridine synthase B	659,Ribosomal large subunit pseudouridine synthase B	1722,Ribosomal large subunit pseudouridine synthase B	609,Ribosomal large subunit pseudouridine synthase B	232,Ribosomal large subunit pseudouridine synthase B	141,Ribosomal large subunit pseudouridine synthase B	139,Ribosomal large subunit pseudouridine synthase B	403,Ribosomal large subunit pseudouridine synthase B
137,Segregation and condensation protein B	139,Segregation and condensation protein B	540,Segregation and condensation protein B	69,Segregation and condensation protein B	140,Segregation and condensation protein B	1240,Segregation and condensation protein B	646,Segregation and condensation protein B	1346,Segregation and condensation protein B	901,Segregation and condensation protein B	645,Segregation and condensation protein B	476,Segregation and condensation protein B	69,Segregation and condensation protein B	474,Segregation and condensation protein B	660,Segregation and condensation protein B	1723,Segregation and condensation protein B	610,Segregation and condensation protein B	233,Segregation and condensation protein B	140,Segregation and condensation protein B	138,Segregation and condensation protein B	402,Segregation and condensation protein B
138,Segregation and condensation protein A	140,Segregation and condensation protein A	539,Segregation and condensation protein A	70,Segregation and condensation protein A	141,Segregation and condensation protein A	1241,Segregation and condensation protein A	645,Segregation and condensation protein A	1345,Segregation and condensation protein A	902,Segregation and condensation protein A	644,Segregation and condensation protein A	477,Segregation and condensation protein A	70,Segregation and condensation protein A	475,Segregation and condensation protein A	661,Segregation and condensation protein A	1724,Segregation and condensation protein A	611,Segregation and condensation protein A	234,Segregation and condensation protein A	139,Segregation and condensation protein A	137,Segregation and condensation protein A	401,Segregation and condensation protein A
139,Tyrosine recombinase XerD	141,Tyrosine recombinase XerD	538,Tyrosine recombinase XerD	71,Tyrosine recombinase XerD	142,Tyrosine recombinase XerD	1242,Tyrosine recombinase XerD	644,Tyrosine recombinase XerD	1344,Tyrosine recombinase XerD	903,Tyrosine recombinase XerD	643,Tyrosine recombinase XerD	478,Tyrosine recombinase XerD	71,Tyrosine recombinase XerD	476,Tyrosine recombinase XerD	662,Tyrosine recombinase XerD	1725,Tyrosine recombinase XerD	612,Tyrosine recombinase XerD	235,Tyrosine recombinase XerD	138,Tyrosine recombinase XerD	136,Tyrosine recombinase XerD	400,Tyrosine recombinase XerD
140,Inosine-5-monophosphate dehydrogenase	142,Inosine-5-monophosphate dehydrogenase	537,Inosine-5-monophosphate dehydrogenase	72,Inosine-5-monophosphate dehydrogenase	143,Inosine-5-monophosphate dehydrogenase	1243,Inosine-5-monophosphate dehydrogenase	643,Inosine-5-monophosphate dehydrogenase	1343,Inosine-5-monophosphate dehydrogenase	904,Inosine-5-monophosphate dehydrogenase	642,Inosine-5-monophosphate dehydrogenase	479,Inosine-5-monophosphate dehydrogenase	72,Inosine-5-monophosphate dehydrogenase	477,Inosine-5-monophosphate dehydrogenase	663,Inosine-5-monophosphate dehydrogenase	1726,Inosine-5-monophosphate dehydrogenase	613,Inosine-5-monophosphate dehydrogenase	236,Inosine-5-monophosphate dehydrogenase	137,Inosine-5-monophosphate dehydrogenase	135,Inosine-5-monophosphate dehydrogenase	399,Inosine-5-monophosphate dehydrogenase
141,FIG009886: phosphoesterase	143,FIG009886: phosphoesterase	536,FIG009886: phosphoesterase	73,FIG009886: phosphoesterase	144,FIG009886: phosphoesterase	1244,FIG009886: phosphoesterase	642,FIG009886: phosphoesterase	1342,FIG009886: phosphoesterase	905,FIG009886: phosphoesterase	641,FIG009886: phosphoesterase	480,FIG009886: phosphoesterase	73,FIG009886: phosphoesterase	478,FIG009886: phosphoesterase	664,FIG009886: phosphoesterase	1727,FIG009886: phosphoesterase	614,FIG009886: phosphoesterase	237,FIG009886: phosphoesterase	136,FIG009886: phosphoesterase	134,FIG009886: phosphoesterase	398,FIG009886: phosphoesterase
142,unknown domain / Nucleoside 5-triphosphatase RdgB (dHAPTP, dITP, XTP-specific)	144,unknown domain / Nucleoside 5-triphosphatase RdgB (dHAPTP, dITP, XTP-specific)	535,unknown domain / Nucleoside 5-triphosphatase RdgB (dHAPTP, dITP, XTP-specific)	74,unknown domain / Nucleoside 5-triphosphatase RdgB (dHAPTP, dITP, XTP-specific)	145,unknown domain / Nucleoside 5-triphosphatase RdgB (dHAPTP, dITP, XTP-specific)	1245,unknown domain / Nucleoside 5-triphosphatase RdgB (dHAPTP, dITP, XTP-specific)	641,unknown domain / Nucleoside 5-triphosphatase RdgB (dHAPTP, dITP, XTP-specific)	1341,unknown domain / Nucleoside 5-triphosphatase RdgB (dHAPTP, dITP, XTP-specific)	906,unknown domain / Nucleoside 5-triphosphatase RdgB (dHAPTP, dITP, XTP-specific)	640,unknown domain / Nucleoside 5-triphosphatase RdgB (dHAPTP, dITP, XTP-specific)	481,unknown domain / Nucleoside 5-triphosphatase RdgB (dHAPTP, dITP, XTP-specific)	74,unknown domain / Nucleoside 5-triphosphatase RdgB (dHAPTP, dITP, XTP-specific)	479,unknown domain / Nucleoside 5-triphosphatase RdgB (dHAPTP, dITP, XTP-specific)	665,unknown domain / Nucleoside 5-triphosphatase RdgB (dHAPTP, dITP, XTP-specific)	1728,unknown domain / Nucleoside 5-triphosphatase RdgB (dHAPTP, dITP, XTP-specific)	615,unknown domain / Nucleoside 5-triphosphatase RdgB (dHAPTP, dITP, XTP-specific)	238,unknown domain / Nucleoside 5-triphosphatase RdgB (dHAPTP, dITP, XTP-specific)	135,unknown domain / Nucleoside 5-triphosphatase RdgB (dHAPTP, dITP, XTP-specific)	133,unknown domain / Nucleoside 5-triphosphatase RdgB (dHAPTP, dITP, XTP-specific)	397,unknown domain / Nucleoside 5-triphosphatase RdgB (dHAPTP, dITP, XTP-specific)
143,Glutamate racemase	145,Glutamate racemase	534,Glutamate racemase	75,Glutamate racemase	146,Glutamate racemase	1246,Glutamate racemase	640,Glutamate racemase	1340,Glutamate racemase	907,Glutamate racemase	639,Glutamate racemase	482,Glutamate racemase	75,Glutamate racemase	480,Glutamate racemase	666,Glutamate racemase	1729,Glutamate racemase	616,Glutamate racemase	239,Glutamate racemase	134,Glutamate racemase	132,Glutamate racemase	396,Glutamate racemase
144,FIG027054: hypothetical protein	146,FIG027054: hypothetical protein	533,FIG027054: hypothetical protein	76,FIG027054: hypothetical protein	147,FIG027054: hypothetical protein	1247,FIG027054: hypothetical protein	639,FIG027054: hypothetical protein	1339,FIG027054: hypothetical protein	908,FIG027054: hypothetical protein	638,FIG027054: hypothetical protein	483,FIG027054: hypothetical protein	76,FIG027054: hypothetical protein	481,FIG027054: hypothetical protein	667,FIG027054: hypothetical protein	1730,FIG027054: hypothetical protein	617,FIG027054: hypothetical protein	240,FIG027054: hypothetical protein	133,FIG027054: hypothetical protein	131,FIG027054: hypothetical protein	395,FIG027054: hypothetical protein
145,FIG005935: membrane protein	147,FIG005935: membrane protein	532,FIG005935: membrane protein	77,FIG005935: membrane protein	148,FIG005935: membrane protein	1249,FIG005935: membrane protein	638,FIG005935: membrane protein	1338,FIG005935: membrane protein	909,FIG005935: membrane protein	637,FIG005935: membrane protein	484,FIG005935: membrane protein	77,FIG005935: membrane protein	482,FIG005935: membrane protein	668,FIG005935: membrane protein	1731,FIG005935: membrane protein	618,FIG005935: membrane protein	241,FIG005935: membrane protein	132,FIG005935: membrane protein	130,FIG005935: membrane protein	394,FIG005935: membrane protein
146,FIG005986: HD family hydrolase	148,FIG005986: HD family hydrolase	531,FIG005986: HD family hydrolase	78,FIG005986: HD family hydrolase	149,FIG005986: HD family hydrolase	1250,FIG005986: HD family hydrolase	637,FIG005986: HD family hydrolase	1337,FIG005986: HD family hydrolase	910,FIG005986: HD family hydrolase	636,FIG005986: HD family hydrolase	485,FIG005986: HD family hydrolase	78,FIG005986: HD family hydrolase	483,FIG005986: HD family hydrolase	669,FIG005986: HD family hydrolase	1732,FIG005986: HD family hydrolase	619,FIG005986: HD family hydrolase	242,FIG005986: HD family hydrolase	131,FIG005986: HD family hydrolase	129,FIG005986: HD family hydrolase	393,FIG005986: HD family hydrolase
147,FIG011178: rRNA methylase	149,FIG011178: rRNA methylase	530,FIG011178: rRNA methylase	79,FIG011178: rRNA methylase	150,FIG011178: rRNA methylase	1251,FIG011178: rRNA methylase	636,FIG011178: rRNA methylase	1336,FIG011178: rRNA methylase	911,FIG011178: rRNA methylase	635,FIG011178: rRNA methylase	486,FIG011178: rRNA methylase	79,FIG011178: rRNA methylase	484,FIG011178: rRNA methylase	670,FIG011178: rRNA methylase	1733,FIG011178: rRNA methylase	620,FIG011178: rRNA methylase	243,FIG011178: rRNA methylase	130,FIG011178: rRNA methylase	128,FIG011178: rRNA methylase	392,FIG011178: rRNA methylase
395,hypothetical protein	1409,hypothetical protein	- , -	- , -	- , -	- , -	- , -	- , -	- , -	- , -	- , -	- , -	- , -	- , -	1026,hypothetical protein	- , -	109,hypothetical protein	- , -	- , -	- , -
396,hypothetical protein	1408,hypothetical protein	- , -	- , -	- , -	- , -	- , -	- , -	- , -	- , -	- , -	- , -	- , -	- , -	1025,hypothetical protein	- , -	110,hypothetical protein	- , -	- , -	- , -
397,hypothetical protein	1407,hypothetical protein	- , -	- , -	- , -	- , -	- , -	- , -	- , -	- , -	- , -	- , -	- , -	- , -	1024,hypothetical protein	- , -	111,hypothetical protein	- , -	- , -	- , -
398,Mobile element protein	1406,Mobile element protein	- , -	- , -	- , -	- , -	703,Mobile element protein	- , -	- , -	- , -	- , -	- , -	- , -	1197,Mobile element protein	- , -	923,Mobile element protein	112,Mobile element protein	- , -	- , -	- , -
399,Mobile element protein	1405,Mobile element protein	- , -	- , -	- , -	- , -	1707,Mobile element protein	- , -	- , -	- , -	- , -	- , -	- , -	1196,Mobile element protein	1028,Mobile element protein	924,Mobile element protein	113,Mobile element protein	- , -	- , -	- , -
400,Glucuronide permease	1404,Glucuronide permease	- , -	- , -	- , -	- , -	- , -	- , -	- , -	- , -	- , -	- , -	- , -	- , -	245,Glucuronide permease	- , -	114,Glucuronide permease	- , -	- , -	- , -
401,2-dehydro-3-deoxygluconate kinase	1403,2-dehydro-3-deoxygluconate kinase	- , -	- , -	- , -	- , -	- , -	- , -	- , -	- , -	- , -	- , -	- , -	- , -	244,2-dehydro-3-deoxygluconate kinase	- , -	115,2-dehydro-3-deoxygluconate kinase	- , -	- , -	- , -
402,2-dehydro-3-deoxygluconate kinase	1402,2-dehydro-3-deoxygluconate kinase	- , -	- , -	- , -	- , -	- , -	- , -	- , -	- , -	- , -	- , -	- , -	- , -	243,2-dehydro-3-deoxygluconate kinase	- , -	116,2-dehydro-3-deoxygluconate kinase	- , -	- , -	- , -
403,2-dehydro-3-deoxygluconate kinase	1401,2-dehydro-3-deoxygluconate kinase	- , -	- , -	- , -	- , -	- , -	- , -	- , -	- , -	- , -	- , -	- , -	- , -	242,2-dehydro-3-deoxygluconate kinase	- , -	117,2-dehydro-3-deoxygluconate kinase	- , -	- , -	- , -
404,Transcriptional regulator, GntR family	1400,Transcriptional regulator, GntR family	- , -	- , -	- , -	- , -	- , -	- , -	- , -	- , -	- , -	- , -	- , -	- , -	241,Transcriptional regulator, GntR family	- , -	118,Transcriptional regulator, GntR family	- , -	- , -	- , -
405,4-hydroxy-2-oxoglutarate aldolase @ 2-dehydro-3-deoxyphosphogluconate aldolase	1399,4-hydroxy-2-oxoglutarate aldolase @ 2-dehydro-3-deoxyphosphogluconate aldolase	- , -	1516,4-Hydroxy-2-oxoglutarate aldolase @ 2-dehydro-3-deoxyphosphogluconate aldolase	1504,4-Hydroxy-2-oxoglutarate aldolase @ 2-dehydro-3-deoxyphosphogluconate aldolase	879,4-Hydroxy-2-oxoglutarate aldolase @ 2-dehydro-3-deoxyphosphogluconate aldolase	1698,4-Hydroxy-2-oxoglutarate aldolase @ 2-dehydro-3-deoxyphosphogluconate aldolase	- , -	- , -	- , -	- , -	1480,4-Hydroxy-2-oxoglutarate aldolase @ 2-dehydro-3-deoxyphosphogluconate aldolase	- , -	1235,4-Hydroxy-2-oxoglutarate aldolase @ 2-dehydro-3-deoxyphosphogluconate aldolase	240,4-hydroxy-2-oxoglutarate aldolase @ 2-dehydro-3-deoxyphosphogluconate aldolase	1198,4-Hydroxy-2-oxoglutarate aldolase @ 2-dehydro-3-deoxyphosphogluconate aldolase	119,4-hydroxy-2-oxoglutarate aldolase @ 2-dehydro-3-deoxyphosphogluconate aldolase	1240,4-Hydroxy-2-oxoglutarate aldolase @ 2-dehydro-3-deoxyphosphogluconate aldolase	1384,4-Hydroxy-2-oxoglutarate aldolase @ 2-dehydro-3-deoxyphosphogluconate aldolase	62,4-Hydroxy-2-oxoglutarate aldolase @ 2-dehydro-3-deoxyphosphogluconate aldolase
406,Uronate isomerase	1398,Uronate isomerase	- , -	- , -	- , -	- , -	- , -	- , -	- , -	- , -	- , -	- , -	- , -	- , -	239,Uronate isomerase	- , -	120,Uronate isomerase	- , -	- , -	- , -
407,Mannonate dehydratase	1397,Mannonate dehydratase	- , -	- , -	- , -	- , -	- , -	- , -	- , -	- , -	- , -	- , -	- , -	- , -	238,Mannonate dehydratase	- , -	121,Mannonate dehydratase	- , -	- , -	- , -
408,D-mannonate oxidoreductase	1396,D-mannonate oxidoreductase	- , -	- , -	- , -	- , -	- , -	- , -	- , -	- , -	- , -	- , -	- , -	- , -	237,D-mannonate oxidoreductase	- , -	122,D-mannonate oxidoreductase	- , -	- , -	- , -
409,Hydrolase, haloacid dehalogenase-like family	1395,Hydrolase, haloacid dehalogenase-like family	- , -	- , -	- , -	- , -	- , -	- , -	- , -	- , -	- , -	- , -	- , -	- , -	236,Hydrolase, haloacid dehalogenase-like family	- , -	123,Hydrolase, haloacid dehalogenase-like family	- , -	- , -	- , -
410,Beta-hexosaminidase	1394,Beta-hexosaminidase	- , -	- , -	- , -	- , -	- , -	- , -	- , -	- , -	- , -	- , -	- , -	- , -	235,Beta-hexosaminidase	- , -	124,Beta-hexosaminidase	- , -	- , -	- , -
411,Beta-hexosaminidase	1393,Beta-hexosaminidase	- , -	- , -	- , -	- , -	- , -	- , -	- , -	- , -	- , -	- , -	- , -	- , -	234,Beta-hexosaminidase	- , -	125,Beta-hexosaminidase	- , -	- , -	- , -
412,Transcriptional regulators, LysR family	1392,Transcriptional regulators, LysR family	18,Transcriptional regulators, LysR family	599,Transcriptional regulators, LysR family	1846,Transcriptional regulators, LysR family	1144,Transcriptional regulators, LysR family	1139,Transcriptional regulators, LysR family	616,Transcriptional regulators, LysR family	1254,Transcriptional regulators, LysR family	963,Transcriptional regulators, LysR family	999,Transcriptional regulators, LysR family	1228,Transcriptional regulators, LysR family	958,Transcriptional regulators, LysR family	1008,Transcriptional regulators, LysR family	233,Transcriptional regulators, LysR family	1758,Transcriptional regulators, LysR family	126,Transcriptional regulators, LysR family	1407,Transcriptional regulators, LysR family	1342,Transcriptional regulators, LysR family	- , -
413,3-ketoacyl-CoA thiolase @ Acetyl-CoA acetyltransferase	1391,3-ketoacyl-CoA thiolase @ Acetyl-CoA acetyltransferase	19,3-ketoacyl-CoA thiolase @ Acetyl-CoA acetyltransferase	598,3-ketoacyl-CoA thiolase @ Acetyl-CoA acetyltransferase	1845,3-ketoacyl-CoA thiolase @ Acetyl-CoA acetyltransferase	1143,3-ketoacyl-CoA thiolase @ Acetyl-CoA acetyltransferase	1140,3-ketoacyl-CoA thiolase @ Acetyl-CoA acetyltransferase	617,3-ketoacyl-CoA thiolase @ Acetyl-CoA acetyltransferase	1253,3-ketoacyl-CoA thiolase @ Acetyl-CoA acetyltransferase	962,3-ketoacyl-CoA thiolase @ Acetyl-CoA acetyltransferase	1000,3-ketoacyl-CoA thiolase @ Acetyl-CoA acetyltransferase	1229,3-ketoacyl-CoA thiolase @ Acetyl-CoA acetyltransferase	957,3-ketoacyl-CoA thiolase @ Acetyl-CoA acetyltransferase	1007,3-ketoacyl-CoA thiolase @ Acetyl-CoA acetyltransferase	232,3-ketoacyl-CoA thiolase @ Acetyl-CoA acetyltransferase	1757,3-ketoacyl-CoA thiolase @ Acetyl-CoA acetyltransferase	127,3-ketoacyl-CoA thiolase @ Acetyl-CoA acetyltransferase	1406,3-ketoacyl-CoA thiolase @ Acetyl-CoA acetyltransferase	1343,3-ketoacyl-CoA thiolase @ Acetyl-CoA acetyltransferase	265,3-ketoacyl-CoA thiolase @ Acetyl-CoA acetyltransferase
414,Butyrate-acetoacetate CoA-transferase subunit A	1390,Butyrate-acetoacetate CoA-transferase subunit A	20,Butyrate-acetoacetate CoA-transferase subunit A	597,Butyrate-acetoacetate CoA-transferase subunit A	1844,Butyrate-acetoacetate CoA-transferase subunit A	1142,Butyrate-acetoacetate CoA-transferase subunit A	1141,Butyrate-acetoacetate CoA-transferase subunit A	618,Butyrate-acetoacetate CoA-transferase subunit A	1252,Butyrate-acetoacetate CoA-transferase subunit A	961,Butyrate-acetoacetate CoA-transferase subunit A	1001,Butyrate-acetoacetate CoA-transferase subunit A	1230,Butyrate-acetoacetate CoA-transferase subunit A	956,Butyrate-acetoacetate CoA-transferase subunit A	1006,Butyrate-acetoacetate CoA-transferase subunit A	231,Butyrate-acetoacetate CoA-transferase subunit A	1756,Butyrate-acetoacetate CoA-transferase subunit A	128,Butyrate-acetoacetate CoA-transferase subunit A	1405,Butyrate-acetoacetate CoA-transferase subunit A	1344,Butyrate-acetoacetate CoA-transferase subunit A	266,Butyrate-acetoacetate CoA-transferase subunit A
415,Butyrate-acetoacetate CoA-transferase subunit B	1389,Butyrate-acetoacetate CoA-transferase subunit B	21,Butyrate-acetoacetate CoA-transferase subunit B	596,Butyrate-acetoacetate CoA-transferase subunit B	1843,Butyrate-acetoacetate CoA-transferase subunit B	1141,Butyrate-acetoacetate CoA-transferase subunit B	1142,Butyrate-acetoacetate CoA-transferase subunit B	619,Butyrate-acetoacetate CoA-transferase subunit B	1251,Butyrate-acetoacetate CoA-transferase subunit B	960,Butyrate-acetoacetate CoA-transferase subunit B	1002,Butyrate-acetoacetate CoA-transferase subunit B	1231,Butyrate-acetoacetate CoA-transferase subunit B	955,Butyrate-acetoacetate CoA-transferase subunit B	1005,Butyrate-acetoacetate CoA-transferase subunit B	230,Butyrate-acetoacetate CoA-transferase subunit B	1755,Butyrate-acetoacetate CoA-transferase subunit B	129,Butyrate-acetoacetate CoA-transferase subunit B	1404,Butyrate-acetoacetate CoA-transferase subunit B	1345,Butyrate-acetoacetate CoA-transferase subunit B	267,Butyrate-acetoacetate CoA-transferase subunit B
416,Short chain fatty acids transporter	1388,Short chain fatty acids transporter	22,Short chain fatty acids transporter	595,Short chain fatty acids transporter	1842,Short chain fatty acids transporter	1140,Short chain fatty acids transporter	1143,Short chain fatty acids transporter	620,Short chain fatty acids transporter	1250,Short chain fatty acids transporter	959,Short chain fatty acids transporter	1003,Short chain fatty acids transporter	1232,Short chain fatty acids transporter	954,Short chain fatty acids transporter	1004,Short chain fatty acids transporter	229,Short chain fatty acids transporter	1754,Short chain fatty acids transporter	130,Short chain fatty acids transporter	1403,Short chain fatty acids transporter	1346,Short chain fatty acids transporter	268,Short chain fatty acids transporter
417,C5a peptidase	- , -	- , -	- , -	1841,C5a peptidase	- , -	1144,C5a peptidase	- , -	1249,C5a peptidase	- , -	1004,C5a peptidase	- , -	953,C5a peptidase	- , -	- , -	1753,C5a peptidase	- , -	- , -	1347,C5a peptidase	- , -
418,C5a peptidase	1387,C5a peptidase	23,C5a peptidase	594,C5a peptidase	- , -	1139,C5a peptidase	- , -	621,C5a peptidase	- , -	958,C5a peptidase	- , -	1233,C5a peptidase	- , -	1003,C5a peptidase	228,C5a peptidase	- , -	131,C5a peptidase	1402,C5a peptidase	- , -	269,C5a peptidase
419,hypothetical protein	1386,hypothetical protein	- , -	593,hypothetical protein	1840,hypothetical protein	1138,hypothetical protein	1145,hypothetical protein	622,hypothetical protein	1248,hypothetical protein	957,hypothetical protein	1005,hypothetical protein	1234,hypothetical protein	952,hypothetical protein	- , -	227,hypothetical protein	- , -	133,hypothetical protein	1401,hypothetical protein	1348,hypothetical protein	270,hypothetical protein
420,Bactoprenol glucosyl transferase	1385,Bactoprenol glucosyl transferase	24,Bactoprenol glucosyl transferase	592,Bactoprenol glucosyl transferase	1839,Bactoprenol glucosyl transferase	1137,Bactoprenol glucosyl transferase	1146,Bactoprenol glucosyl transferase	623,Bactoprenol glucosyl transferase	1247,Bactoprenol glucosyl transferase	956,Bactoprenol glucosyl transferase	1006,Bactoprenol glucosyl transferase	1235,Bactoprenol glucosyl transferase	951,Bactoprenol glucosyl transferase	139,Bactoprenol glucosyl transferase	226,Bactoprenol glucosyl transferase	1752,Bactoprenol glucosyl transferase	134,Bactoprenol glucosyl transferase	1400,Bactoprenol glucosyl transferase	1349,Bactoprenol glucosyl transferase	271,Bactoprenol glucosyl transferase
421,GtrA family protein	1384,GtrA family protein	25,GtrA family protein	591,GtrA family protein	1838,GtrA family protein	1136,GtrA family protein	1147,GtrA family protein	624,GtrA family protein	1246,GtrA family protein	955,GtrA family protein	1007,GtrA family protein	1236,GtrA family protein	950,GtrA family protein	138,GtrA family protein	225,GtrA family protein	1751,GtrA family protein	135,GtrA family protein	1399,GtrA family protein	1350,GtrA family protein	272,GtrA family protein
422,UDP-galactose:(galactosyl) LPS alpha1,2-galactosyltransferase WaaW	933,UDP-galactose:(galactosyl) LPS alpha1,2-galactosyltransferase WaaW	26,UDP-galactose:(galactosyl) LPS alpha1,2-galactosyltransferase WaaW	589,UDP-galactose:(galactosyl) LPS alpha1,2-galactosyltransferase WaaW	1837,UDP-galactose:(galactosyl) LPS alpha1,2-galactosyltransferase WaaW	1135,UDP-galactose:(galactosyl) LPS alpha1,2-galactosyltransferase WaaW	1148,UDP-galactose:(galactosyl) LPS alpha1,2-galactosyltransferase WaaW	626,UDP-galactose:(galactosyl) LPS alpha1,2-galactosyltransferase WaaW	1244,UDP-galactose:(galactosyl) LPS alpha1,2-galactosyltransferase WaaW	953,UDP-galactose:(galactosyl) LPS alpha1,2-galactosyltransferase WaaW	1009,UDP-galactose:(galactosyl) LPS alpha1,2-galactosyltransferase WaaW	1237,UDP-galactose:(galactosyl) LPS alpha1,2-galactosyltransferase WaaW	948,UDP-galactose:(galactosyl) LPS alpha1,2-galactosyltransferase WaaW	137,UDP-galactose:(galactosyl) LPS alpha1,2-galactosyltransferase WaaW	224,UDP-galactose:(galactosyl) LPS alpha1,2-galactosyltransferase WaaW	1750,UDP-galactose:(galactosyl) LPS alpha1,2-galactosyltransferase WaaW	136,UDP-galactose:(galactosyl) LPS alpha1,2-galactosyltransferase WaaW	1397,UDP-galactose:(galactosyl) LPS alpha1,2-galactosyltransferase WaaW	1352,UDP-galactose:(galactosyl) LPS alpha1,2-galactosyltransferase WaaW	273,UDP-galactose:(galactosyl) LPS alpha1,2-galactosyltransferase WaaW
423,Polysaccharide deacetylase	932,Polysaccharide deacetylase	27,Polysaccharide deacetylase	588,Polysaccharide deacetylase	1836,Polysaccharide deacetylase	1134,Polysaccharide deacetylase	1149,Polysaccharide deacetylase	627,Polysaccharide deacetylase	1243,Polysaccharide deacetylase	952,Polysaccharide deacetylase	1010,Polysaccharide deacetylase	1238,Polysaccharide deacetylase	947,Polysaccharide deacetylase	136,Polysaccharide deacetylase	223,Polysaccharide deacetylase	1749,Polysaccharide deacetylase	137,Polysaccharide deacetylase	1396,Polysaccharide deacetylase	1353,Polysaccharide deacetylase	274,Polysaccharide deacetylase
424,hypothetical protein	931,hypothetical protein	28,hypothetical protein	587,hypothetical protein	1835,hypothetical protein	1883,hypothetical protein	1150,hypothetical protein	628,hypothetical protein	1242,hypothetical protein	951,hypothetical protein	1011,hypothetical protein	1239,hypothetical protein	946,hypothetical protein	135,hypothetical protein	222,hypothetical protein	1748,hypothetical protein	138,hypothetical protein	1395,hypothetical protein	1354,hypothetical protein	275,hypothetical protein
425,Homoserine kinase	930,Homoserine kinase	29,Homoserine kinase	586,Homoserine kinase	1834,Homoserine kinase	1884,Homoserine kinase	1151,Homoserine kinase	629,Homoserine kinase	1241,Homoserine kinase	950,Homoserine kinase	1012,Homoserine kinase	1240,Homoserine kinase	945,Homoserine kinase	134,Homoserine kinase	221,Homoserine kinase	1747,Homoserine kinase	139,Homoserine kinase	1394,Homoserine kinase	1355,Homoserine kinase	276,Homoserine kinase
426,Dihydrofolate synthase @ Folylpolyglutamate synthase	929,Dihydrofolate synthase @ Folylpolyglutamate synthase	30,Dihydrofolate synthase @ Folylpolyglutamate synthase	585,Dihydrofolate synthase / Folylpolyglutamate synthase	1833,Dihydrofolate synthase / Folylpolyglutamate synthase	1885,Dihydrofolate synthase / Folylpolyglutamate synthase	1152,Dihydrofolate synthase / Folylpolyglutamate synthase	630,Dihydrofolate synthase @ Folylpolyglutamate synthase	1240,Dihydrofolate synthase @ Folylpolyglutamate synthase	949,Dihydrofolate synthase @ Folylpolyglutamate synthase	1013,Dihydrofolate synthase @ Folylpolyglutamate synthase	1241,Dihydrofolate synthase / Folylpolyglutamate synthase	944,Dihydrofolate synthase @ Folylpolyglutamate synthase	133,Dihydrofolate synthase @ Folylpolyglutamate synthase	220,Dihydrofolate synthase @ Folylpolyglutamate synthase	1746,Dihydrofolate synthase @ Folylpolyglutamate synthase	140,Dihydrofolate synthase @ Folylpolyglutamate synthase	1393,Dihydrofolate synthase @ Folylpolyglutamate synthase	1356,Dihydrofolate synthase @ Folylpolyglutamate synthase	277,Dihydrofolate synthase @ Folylpolyglutamate synthase
427,GTP cyclohydrolase I type 1	928,GTP cyclohydrolase I type 1	31,GTP cyclohydrolase I type 1	584,GTP cyclohydrolase I type 1	1832,GTP cyclohydrolase I type 1	1886,GTP cyclohydrolase I type 1	1153,GTP cyclohydrolase I type 1	631,GTP cyclohydrolase I type 1	1239,GTP cyclohydrolase I type 1	948,GTP cyclohydrolase I type 1	1014,GTP cyclohydrolase I type 1	1242,GTP cyclohydrolase I type 1	943,GTP cyclohydrolase I type 1	132,GTP cyclohydrolase I type 1	219,GTP cyclohydrolase I type 1	1745,GTP cyclohydrolase I type 1	141,GTP cyclohydrolase I type 1	1392,GTP cyclohydrolase I type 1	1357,GTP cyclohydrolase I type 1	278,GTP cyclohydrolase I type 1
428,Dihydropteroate synthase	927,Dihydropteroate synthase	32,Dihydropteroate synthase	583,Dihydropteroate synthase	1831,Dihydropteroate synthase	1887,Dihydropteroate synthase	1154,Dihydropteroate synthase	632,Dihydropteroate synthase	1238,Dihydropteroate synthase	947,Dihydropteroate synthase	1015,Dihydropteroate synthase	1243,Dihydropteroate synthase	942,Dihydropteroate synthase	131,Dihydropteroate synthase	218,Dihydropteroate synthase	1744,Dihydropteroate synthase	142,Dihydropteroate synthase	1391,Dihydropteroate synthase	1358,Dihydropteroate synthase	279,Dihydropteroate synthase
429,Dihydroneopterin aldolase	926,Dihydroneopterin aldolase	33,Dihydroneopterin aldolase	582,Dihydroneopterin aldolase	1830,Dihydroneopterin aldolase	1888,Dihydroneopterin aldolase	1155,Dihydroneopterin aldolase	633,Dihydroneopterin aldolase	1237,Dihydroneopterin aldolase	946,Dihydroneopterin aldolase	1016,Dihydroneopterin aldolase	1244,Dihydroneopterin aldolase	941,Dihydroneopterin aldolase	130,Dihydroneopterin aldolase	217,Dihydroneopterin aldolase	1743,Dihydroneopterin aldolase	143,Dihydroneopterin aldolase	1390,Dihydroneopterin aldolase	1359,Dihydroneopterin aldolase	280,Dihydroneopterin aldolase
430,2-amino-4-hydroxy-6- hydroxymethyldihydropteridine pyrophosphokinase	925,2-amino-4-hydroxy-6- hydroxymethyldihydropteridine pyrophosphokinase	34,2-amino-4-hydroxy-6- hydroxymethyldihydropteridine pyrophosphokinase	581,2-amino-4-hydroxy-6- hydroxymethyldihydropteridine pyrophosphokinase	1829,2-amino-4-hydroxy-6- hydroxymethyldihydropteridine pyrophosphokinase	1889,2-amino-4-hydroxy-6- hydroxymethyldihydropteridine pyrophosphokinase	1156,2-amino-4-hydroxy-6- hydroxymethyldihydropteridine pyrophosphokinase	634,2-amino-4-hydroxy-6- hydroxymethyldihydropteridine pyrophosphokinase	1236,2-amino-4-hydroxy-6- hydroxymethyldihydropteridine pyrophosphokinase	945,2-amino-4-hydroxy-6- hydroxymethyldihydropteridine pyrophosphokinase	1017,2-amino-4-hydroxy-6- hydroxymethyldihydropteridine pyrophosphokinase	1245,2-amino-4-hydroxy-6- hydroxymethyldihydropteridine pyrophosphokinase	940,2-amino-4-hydroxy-6- hydroxymethyldihydropteridine pyrophosphokinase	129,2-amino-4-hydroxy-6- hydroxymethyldihydropteridine pyrophosphokinase	216,2-amino-4-hydroxy-6- hydroxymethyldihydropteridine pyrophosphokinase	1742,2-amino-4-hydroxy-6- hydroxymethyldihydropteridine pyrophosphokinase	144,2-amino-4-hydroxy-6- hydroxymethyldihydropteridine pyrophosphokinase	1389,2-amino-4-hydroxy-6- hydroxymethyldihydropteridine pyrophosphokinase	1360,2-amino-4-hydroxy-6- hydroxymethyldihydropteridine pyrophosphokinase	281,2-amino-4-hydroxy-6- hydroxymethyldihydropteridine pyrophosphokinase
431,UDP-N-acetylenolpyruvoylglucosamine reductase	924,UDP-N-acetylenolpyruvoylglucosamine reductase	35,UDP-N-acetylenolpyruvoylglucosamine reductase	580,UDP-N-acetylenolpyruvoylglucosamine reductase	1828,UDP-N-acetylenolpyruvoylglucosamine reductase	1890,UDP-N-acetylenolpyruvoylglucosamine reductase	1157,UDP-N-acetylenolpyruvoylglucosamine reductase	635,UDP-N-acetylenolpyruvoylglucosamine reductase	1235,UDP-N-acetylenolpyruvoylglucosamine reductase	944,UDP-N-acetylenolpyruvoylglucosamine reductase	1018,UDP-N-acetylenolpyruvoylglucosamine reductase	1246,UDP-N-acetylenolpyruvoylglucosamine reductase	939,UDP-N-acetylenolpyruvoylglucosamine reductase	128,UDP-N-acetylenolpyruvoylglucosamine reductase	215,UDP-N-acetylenolpyruvoylglucosamine reductase	1741,UDP-N-acetylenolpyruvoylglucosamine reductase	145,UDP-N-acetylenolpyruvoylglucosamine reductase	1388,UDP-N-acetylenolpyruvoylglucosamine reductase	1361,UDP-N-acetylenolpyruvoylglucosamine reductase	282,UDP-N-acetylenolpyruvoylglucosamine reductase
432,Putrescine transport ATP-binding protein PotA (TC 3.A.1.11.1)	923,Putrescine transport ATP-binding protein PotA (TC 3.A.1.11.1)	36,Putrescine transport ATP-binding protein PotA (TC 3.A.1.11.1)	579,Putrescine transport ATP-binding protein PotA (TC 3.A.1.11.1)	1827,Putrescine transport ATP-binding protein PotA (TC 3.A.1.11.1)	1891,Putrescine transport ATP-binding protein PotA (TC 3.A.1.11.1)	1158,Putrescine transport ATP-binding protein PotA (TC 3.A.1.11.1)	636,Putrescine transport ATP-binding protein PotA (TC 3.A.1.11.1)	1234,Putrescine transport ATP-binding protein PotA (TC 3.A.1.11.1)	943,Putrescine transport ATP-binding protein PotA (TC 3.A.1.11.1)	1019,Putrescine transport ATP-binding protein PotA (TC 3.A.1.11.1)	1247,Putrescine transport ATP-binding protein PotA (TC 3.A.1.11.1)	938,Putrescine transport ATP-binding protein PotA (TC 3.A.1.11.1)	127,Putrescine transport ATP-binding protein PotA (TC 3.A.1.11.1)	214,Putrescine transport ATP-binding protein PotA (TC 3.A.1.11.1)	1740,Putrescine transport ATP-binding protein PotA (TC 3.A.1.11.1)	146,Putrescine transport ATP-binding protein PotA (TC 3.A.1.11.1)	1387,Putrescine transport ATP-binding protein PotA (TC 3.A.1.11.1)	1362,Putrescine transport ATP-binding protein PotA (TC 3.A.1.11.1)	283,Putrescine transport ATP-binding protein PotA (TC 3.A.1.11.1)
433,Spermidine Putrescine ABC transporter permease component PotB (TC 3.A.1.11.1)	922,Spermidine Putrescine ABC transporter permease component PotB (TC 3.A.1.11.1)	37,Spermidine Putrescine ABC transporter permease component PotB (TC 3.A.1.11.1)	578,Spermidine Putrescine ABC transporter permease component PotB (TC 3.A.1.11.1)	1826,Spermidine Putrescine ABC transporter permease component PotB (TC 3.A.1.11.1)	1892,Spermidine Putrescine ABC transporter permease component PotB (TC 3.A.1.11.1)	1159,Spermidine Putrescine ABC transporter permease component PotB (TC 3.A.1.11.1)	637,Spermidine Putrescine ABC transporter permease component PotB (TC 3.A.1.11.1)	1233,Spermidine Putrescine ABC transporter permease component PotB (TC 3.A.1.11.1)	942,Spermidine Putrescine ABC transporter permease component PotB (TC 3.A.1.11.1)	1020,Spermidine Putrescine ABC transporter permease component PotB (TC 3.A.1.11.1)	1248,Spermidine Putrescine ABC transporter permease component PotB (TC 3.A.1.11.1)	937,Spermidine Putrescine ABC transporter permease component PotB (TC 3.A.1.11.1)	126,Spermidine Putrescine ABC transporter permease component PotB (TC 3.A.1.11.1)	213,Spermidine Putrescine ABC transporter permease component PotB (TC 3.A.1.11.1)	1739,Spermidine Putrescine ABC transporter permease component PotB (TC 3.A.1.11.1)	147,Spermidine Putrescine ABC transporter permease component PotB (TC 3.A.1.11.1)	1386,Spermidine Putrescine ABC transporter permease component PotB (TC 3.A.1.11.1)	1363,Spermidine Putrescine ABC transporter permease component PotB (TC 3.A.1.11.1)	284,Spermidine Putrescine ABC transporter permease component PotB (TC 3.A.1.11.1)
434,Spermidine Putrescine ABC transporter permease component potC (TC_3.A.1.11.1)	921,Spermidine Putrescine ABC transporter permease component potC (TC_3.A.1.11.1)	38,Spermidine Putrescine ABC transporter permease component potC (TC_3.A.1.11.1)	577,Spermidine Putrescine ABC transporter permease component potC (TC_3.A.1.11.1)	1825,Spermidine Putrescine ABC transporter permease component potC (TC_3.A.1.11.1)	1893,Spermidine Putrescine ABC transporter permease component potC (TC_3.A.1.11.1)	1160,Spermidine Putrescine ABC transporter permease component potC (TC_3.A.1.11.1)	638,Spermidine Putrescine ABC transporter permease component potC (TC_3.A.1.11.1)	1232,Spermidine Putrescine ABC transporter permease component potC (TC_3.A.1.11.1)	941,Spermidine Putrescine ABC transporter permease component potC (TC_3.A.1.11.1)	1021,Spermidine Putrescine ABC transporter permease component potC (TC_3.A.1.11.1)	1249,Spermidine Putrescine ABC transporter permease component potC (TC_3.A.1.11.1)	936,Spermidine Putrescine ABC transporter permease component potC (TC_3.A.1.11.1)	125,Spermidine Putrescine ABC transporter permease component potC (TC_3.A.1.11.1)	212,Spermidine Putrescine ABC transporter permease component potC (TC_3.A.1.11.1)	1738,Spermidine Putrescine ABC transporter permease component potC (TC_3.A.1.11.1)	148,Spermidine Putrescine ABC transporter permease component potC (TC_3.A.1.11.1)	1385,Spermidine Putrescine ABC transporter permease component potC (TC_3.A.1.11.1)	1364,Spermidine Putrescine ABC transporter permease component potC (TC_3.A.1.11.1)	285,Spermidine Putrescine ABC transporter permease component potC (TC_3.A.1.11.1)
435,ABC transporter, periplasmic spermidine putrescine-binding protein PotD (TC 3.A.1.11.1)	920,ABC transporter, periplasmic spermidine putrescine-binding protein PotD (TC 3.A.1.11.1)	39,ABC transporter, periplasmic spermidine putrescine-binding protein PotD (TC 3.A.1.11.1)	576,ABC transporter, periplasmic spermidine putrescine-binding protein PotD (TC 3.A.1.11.1)	1824,ABC transporter, periplasmic spermidine putrescine-binding protein PotD (TC 3.A.1.11.1)	1894,ABC transporter, periplasmic spermidine putrescine-binding protein PotD (TC 3.A.1.11.1)	1161,ABC transporter, periplasmic spermidine putrescine-binding protein PotD (TC 3.A.1.11.1)	639,ABC transporter, periplasmic spermidine putrescine-binding protein PotD (TC 3.A.1.11.1)	1231,ABC transporter, periplasmic spermidine putrescine-binding protein PotD (TC 3.A.1.11.1)	940,ABC transporter, periplasmic spermidine putrescine-binding protein PotD (TC 3.A.1.11.1)	1022,ABC transporter, periplasmic spermidine putrescine-binding protein PotD (TC 3.A.1.11.1)	1250,ABC transporter, periplasmic spermidine putrescine-binding protein PotD (TC 3.A.1.11.1)	935,ABC transporter, periplasmic spermidine putrescine-binding protein PotD (TC 3.A.1.11.1)	124,ABC transporter, periplasmic spermidine putrescine-binding protein PotD (TC 3.A.1.11.1)	211,ABC transporter, periplasmic spermidine putrescine-binding protein PotD (TC 3.A.1.11.1)	1737,ABC transporter, periplasmic spermidine putrescine-binding protein PotD (TC 3.A.1.11.1)	149,ABC transporter, periplasmic spermidine putrescine-binding protein PotD (TC 3.A.1.11.1)	1384,ABC transporter, periplasmic spermidine putrescine-binding protein PotD (TC 3.A.1.11.1)	1365,ABC transporter, periplasmic spermidine putrescine-binding protein PotD (TC 3.A.1.11.1)	286,ABC transporter, periplasmic spermidine putrescine-binding protein PotD (TC 3.A.1.11.1)
810,DNA-directed RNA polymerase delta subunit	150,DNA-directed RNA polymerase delta subunit	370,DNA-directed RNA polymerase delta subunit	1140,DNA-directed RNA polymerase delta subunit	1212,DNA-directed RNA polymerase delta subunit	1632,DNA-directed RNA polymerase delta subunit	1129,DNA-directed RNA polymerase delta subunit	1386,DNA-directed RNA polymerase delta subunit	851,DNA-directed RNA polymerase delta subunit	1130,DNA-directed RNA polymerase delta subunit	808,DNA-directed RNA polymerase delta subunit	1121,DNA-directed RNA polymerase delta subunit	801,DNA-directed RNA polymerase delta subunit	1214,DNA-directed RNA polymerase delta subunit	668,DNA-directed RNA polymerase delta subunit	946,DNA-directed RNA polymerase delta subunit	322,DNA-directed RNA polymerase delta subunit	1218,DNA-directed RNA polymerase delta subunit	1218,DNA-directed RNA polymerase delta subunit	1163,DNA-directed RNA polymerase delta subunit
811,LSU ribosomal protein L13p (L13Ae)	151,LSU ribosomal protein L13p (L13Ae)	371,LSU ribosomal protein L13p (L13Ae)	- , -	- , -	1489,LSU ribosomal protein L13p (L13Ae)	1059,LSU ribosomal protein L13p (L13Ae)	1385,LSU ribosomal protein L13p (L13Ae)	852,LSU ribosomal protein L13p (L13Ae)	1129,LSU ribosomal protein L13p (L13Ae)	809,LSU ribosomal protein L13p (L13Ae)	1326,LSU ribosomal protein L13p (L13Ae)	800,LSU ribosomal protein L13p (L13Ae)	1355,LSU ribosomal protein L13p (L13Ae)	669,LSU ribosomal protein L13p (L13Ae)	1207,LSU ribosomal protein L13p (L13Ae)	323,LSU ribosomal protein L13p (L13Ae)	60,LSU ribosomal protein L13p (L13Ae)	1,LSU ribosomal protein L13p (L13Ae)	1164,LSU ribosomal protein L13p (L13Ae)
812,SSU ribosomal protein S9p (S16e)	152,SSU ribosomal protein S9p (S16e)	372,SSU ribosomal protein S9p (S16e)	- , -	- , -	1488,SSU ribosomal protein S9p (S16e)	1058,SSU ribosomal protein S9p (S16e)	1384,SSU ribosomal protein S9p (S16e)	853,SSU ribosomal protein S9p (S16e)	1128,SSU ribosomal protein S9p (S16e)	810,SSU ribosomal protein S9p (S16e)	1327,SSU ribosomal protein S9p (S16e)	799,SSU ribosomal protein S9p (S16e)	1356,SSU ribosomal protein S9p (S16e)	670,SSU ribosomal protein S9p (S16e)	1208,SSU ribosomal protein S9p (S16e)	324,SSU ribosomal protein S9p (S16e)	59,SSU ribosomal protein S9p (S16e)	2,SSU ribosomal protein S9p (S16e)	1165,SSU ribosomal protein S9p (S16e)
813,Integrase	153,Integrase	- , -	- , -	- , -	1487,Integrase	1545,Integrase	- , -	- , -	- , -	- , -	- , -	- , -	- , -	671,Integrase	- , -	325,Integrase	- , -	- , -	- , -
814,hypothetical protein	154,hypothetical protein	- , -	- , -	- , -	- , -	- , -	- , -	- , -	- , -	- , -	- , -	- , -	- , -	672,hypothetical protein	- , -	326,hypothetical protein	- , -	- , -	- , -
815,FIG01117241: hypothetical protein	155,FIG01117241: hypothetical protein	- , -	- , -	- , -	1484,FIG01117112: hypothetical protein	1543,FIG01117112: hypothetical protein	- , -	- , -	- , -	- , -	- , -	- , -	- , -	673,FIG01117241: hypothetical protein	- , -	327,FIG01117241: hypothetical protein	- , -	- , -	- , -
816,Phage replication initiation	156,Phage replication initiation	- , -	- , -	- , -	- , -	- , -	- , -	- , -	- , -	- , -	- , -	- , -	- , -	674,Phage replication initiation	- , -	328,Phage replication initiation	- , -	- , -	- , -
817,hypothetical protein	157,hypothetical protein	- , -	625,unknown	- , -	- , -	- , -	566,unknown	1316,unknown	1012,unknown	950,unknown	- , -	1007,unknown	339,hypothetical protein	675,hypothetical protein	1028,unknown	329,hypothetical protein	1432,unknown	1317,unknown	- , -
818,Tn5252, Orf 9 protein	158,Tn5252, Orf 9 protein	- , -	- , -	- , -	- , -	- , -	- , -	- , -	- , -	- , -	- , -	- , -	- , -	676,Tn5252, Orf 9 protein	- , -	330,Tn5252, Orf 9 protein	- , -	- , -	- , -
819,Type II restriction enzyme, methylase subunit	159,Type II restriction enzyme, methylase subunit	- , -	- , -	- , -	- , -	- , -	- , -	- , -	- , -	- , -	- , -	- , -	- , -	677,Type II restriction enzyme, methylase subunit	- , -	331,Type II restriction enzyme, methylase subunit	- , -	- , -	- , -
820,Probable DNA methylase	160,Probable DNA methylase	- , -	- , -	- , -	- , -	- , -	- , -	- , -	- , -	- , -	- , -	- , -	- , -	678,Probable DNA methylase	- , -	332,Probable DNA methylase	- , -	- , -	- , -
821,hypothetical protein	161,hypothetical protein	- , -	- , -	- , -	- , -	- , -	- , -	- , -	- , -	- , -	- , -	- , -	- , -	679,hypothetical protein	- , -	333,hypothetical protein	- , -	- , -	- , -
822,ClpB protein	162,ClpB protein	- , -	- , -	- , -	- , -	- , -	- , -	- , -	- , -	- , -	- , -	- , -	- , -	680,ClpB protein	- , -	334,ClpB protein	- , -	- , -	- , -
823,ATP-dependent DNA helicase recG	163,ATP-dependent DNA helicase recG	384,ATP-dependent DNA helicase recG	- , -	- , -	1619,ATP-dependent DNA helicase recG	707,ATP-dependent DNA helicase recG	1157,ATP-dependent DNA helicase recG	865,ATP-dependent DNA helicase recG	1116,ATP-dependent DNA helicase recG	822,ATP-dependent DNA helicase recG	- , -	787,ATP-dependent DNA helicase recG	- , -	681,ATP-dependent DNA helicase recG	- , -	335,ATP-dependent DNA helicase recG	- , -	- , -	1214,ATP-dependent DNA helicase recG
824,ATP-dependent DNA helicase recG	164,ATP-dependent DNA helicase recG	- , -	- , -	- , -	- , -	- , -	- , -	- , -	- , -	- , -	- , -	- , -	- , -	682,ATP-dependent DNA helicase recG	- , -	336,ATP-dependent DNA helicase recG	- , -	- , -	- , -
1,Transcriptional regulator, LacI family	63,Transcriptional regulator, LacI family	265,Transcriptional regulator, LacI family	351,Transcriptional regulator, LacI family	1729,Transcriptional regulator, LacI family	1653,Transcriptional regulator, LacI family	1092,Transcriptional regulator, LacI family	1818,Transcriptional regulator, LacI family	1615,Transcriptional regulator, LacI family	1557,Transcriptional regulator, LacI family	1567,Transcriptional regulator, LacI family	1698,Transcriptional regulator, LacI family	1520,Transcriptional regulator, LacI family	526,Transcriptional regulator, LacI family	148,Transcriptional regulator, LacI family	295,Transcriptional regulator, LacI family	12,Transcriptional regulator, LacI family	1628,Transcriptional regulator, LacI family	1616,Transcriptional regulator, LacI family	329,Transcriptional regulator, LacI family
2,Maltodextrose utilization protein MalA	62,Maltodextrose utilization protein MalA	266,Maltodextrose utilization protein MalA	350,Maltodextrose utilization protein MalA	1728,Maltodextrose utilization protein MalA	1654,Maltodextrose utilization protein MalA	1093,Maltodextrose utilization protein MalA	1817,Maltodextrose utilization protein MalA	1616,Maltodextrose utilization protein MalA	1558,Maltodextrose utilization protein MalA	1568,Maltodextrose utilization protein MalA	1697,Maltodextrose utilization protein MalA	1519,Maltodextrose utilization protein MalA	527,Maltodextrose utilization protein MalA	149,Maltodextrose utilization protein MalA	294,Maltodextrose utilization protein MalA	13,Maltodextrose utilization protein MalA	1629,Maltodextrose utilization protein MalA	1617,Maltodextrose utilization protein MalA	328,Maltodextrose utilization protein MalA
3,Maltose/maltodextrin ABC transporter, permease protein MalG	61,Maltose/maltodextrin ABC transporter, permease protein MalG	267,Maltose/maltodextrin ABC transporter, permease protein MalG	349,Maltose/maltodextrin ABC transporter, permease protein MalG	1727,Maltose/maltodextrin ABC transporter, permease protein MalG	1655,Maltose/maltodextrin ABC transporter, permease protein MalG	1094,Maltose/maltodextrin ABC transporter, permease protein MalG	1816,Maltose/maltodextrin ABC transporter, permease protein MalG	1617,Maltose/maltodextrin ABC transporter, permease protein MalG	1559,Maltose/maltodextrin ABC transporter, permease protein MalG	1569,Maltose/maltodextrin ABC transporter, permease protein MalG	1696,Maltose/maltodextrin ABC transporter, permease protein MalG	1518,Maltose/maltodextrin ABC transporter, permease protein MalG	528,Maltose/maltodextrin ABC transporter, permease protein MalG	150,Maltose/maltodextrin ABC transporter, permease protein MalG	293,Maltose/maltodextrin ABC transporter, permease protein MalG	14,Maltose/maltodextrin ABC transporter, permease protein MalG	1630,Maltose/maltodextrin ABC transporter, permease protein MalG	1618,Maltose/maltodextrin ABC transporter, permease protein MalG	327,Maltose/maltodextrin ABC transporter, permease protein MalG
4,Maltose/maltodextrin ABC transporter, permease protein MalF	60,Maltose/maltodextrin ABC transporter, permease protein MalF	268,Maltose/maltodextrin ABC transporter, permease protein MalF	348,Maltose/maltodextrin ABC transporter, permease protein MalF	1726,Maltose/maltodextrin ABC transporter, permease protein MalF	1656,Maltose/maltodextrin ABC transporter, permease protein MalF	1095,Maltose/maltodextrin ABC transporter, permease protein MalF	1815,Maltose/maltodextrin ABC transporter, permease protein MalF	1618,Maltose/maltodextrin ABC transporter, permease protein MalF	1560,Maltose/maltodextrin ABC transporter, permease protein MalF	1570,Maltose/maltodextrin ABC transporter, permease protein MalF	1695,Maltose/maltodextrin ABC transporter, permease protein MalF	1517,Maltose/maltodextrin ABC transporter, permease protein MalF	529,Maltose/maltodextrin ABC transporter, permease protein MalF	151,Maltose/maltodextrin ABC transporter, permease protein MalF	292,Maltose/maltodextrin ABC transporter, permease protein MalF	15,Maltose/maltodextrin ABC transporter, permease protein MalF	1631,Maltose/maltodextrin ABC transporter, permease protein MalF	1619,Maltose/maltodextrin ABC transporter, permease protein MalF	326,Maltose/maltodextrin ABC transporter, permease protein MalF
5,Neopullulanase	59,Neopullulanase	269,Neopullulanase	347,Neopullulanase	1725,Neopullulanase	1658,Neopullulanase	1096,Neopullulanase	1814,Neopullulanase	1619,Neopullulanase	1561,Neopullulanase	1571,Neopullulanase	1694,Neopullulanase	1516,Neopullulanase	531,Neopullulanase	152,Neopullulanase	290,Neopullulanase	16,Neopullulanase	1632,Neopullulanase	1620,Neopullulanase	325,Neopullulanase
6,Maltose/maltodextrin ABC transporter, substrate binding periplasmic protein MalE	58,Maltose/maltodextrin ABC transporter, substrate binding periplasmic protein MalE	270,Maltose/maltodextrin ABC transporter, substrate binding periplasmic protein MalE	346,Maltose/maltodextrin ABC transporter, substrate binding periplasmic protein MalE	1724,Maltose/maltodextrin ABC transporter, substrate binding periplasmic protein MalE	1659,Maltose/maltodextrin ABC transporter, substrate binding periplasmic protein MalE	1097,Maltose/maltodextrin ABC transporter, substrate binding periplasmic protein MalE	1813,Maltose/maltodextrin ABC transporter, substrate binding periplasmic protein MalE	1620,Maltose/maltodextrin ABC transporter, substrate binding periplasmic protein MalE	1562,Maltose/maltodextrin ABC transporter, substrate binding periplasmic protein MalE	1572,Maltose/maltodextrin ABC transporter, substrate binding periplasmic protein MalE	1693,Maltose/maltodextrin ABC transporter, substrate binding periplasmic protein MalE	1515,Maltose/maltodextrin ABC transporter, substrate binding periplasmic protein MalE	532,Maltose/maltodextrin ABC transporter, substrate binding periplasmic protein MalE	153,Maltose/maltodextrin ABC transporter, substrate binding periplasmic protein MalE	289,Maltose/maltodextrin ABC transporter, substrate binding periplasmic protein MalE	17,Maltose/maltodextrin ABC transporter, substrate binding periplasmic protein MalE	1633,Maltose/maltodextrin ABC transporter, substrate binding periplasmic protein MalE	1621,Maltose/maltodextrin ABC transporter, substrate binding periplasmic protein MalE	324,Maltose/maltodextrin ABC transporter, substrate binding periplasmic protein MalE
7,dTDP-4-dehydrorhamnose reductase	57,dTDP-4-dehydrorhamnose reductase	271,dTDP-4-dehydrorhamnose reductase	345,dTDP-4-dehydrorhamnose reductase	1723,dTDP-4-dehydrorhamnose reductase	1660,dTDP-4-dehydrorhamnose reductase	1785,dTDP-4-dehydrorhamnose reductase	1812,dTDP-4-dehydrorhamnose reductase	1621,dTDP-4-dehydrorhamnose reductase	1563,dTDP-4-dehydrorhamnose reductase	1573,dTDP-4-dehydrorhamnose reductase	1692,dTDP-4-dehydrorhamnose reductase	1514,dTDP-4-dehydrorhamnose reductase	448,dTDP-4-dehydrorhamnose reductase	154,dTDP-4-dehydrorhamnose reductase	249,dTDP-4-dehydrorhamnose reductase	18,dTDP-4-dehydrorhamnose reductase	1634,dTDP-4-dehydrorhamnose reductase	1622,dTDP-4-dehydrorhamnose reductase	323,dTDP-4-dehydrorhamnose reductase
8,Alpha-L-Rha alpha-1,3-L-rhamnosyltransferase	56,Alpha-L-Rha alpha-1,3-L-rhamnosyltransferase	272,Alpha-L-Rha alpha-1,3-L-rhamnosyltransferase	344,Alpha-L-Rha alpha-1,3-L-rhamnosyltransferase	1722,Alpha-L-Rha alpha-1,3-L-rhamnosyltransferase	1661,Alpha-L-Rha alpha-1,3-L-rhamnosyltransferase	1786,Alpha-L-Rha alpha-1,3-L-rhamnosyltransferase	1811,Alpha-L-Rha alpha-1,3-L-rhamnosyltransferase	1622,Alpha-L-Rha alpha-1,3-L-rhamnosyltransferase	1564,Alpha-L-Rha alpha-1,3-L-rhamnosyltransferase	1574,Alpha-L-Rha alpha-1,3-L-rhamnosyltransferase	1691,Alpha-L-Rha alpha-1,3-L-rhamnosyltransferase	1513,Alpha-L-Rha alpha-1,3-L-rhamnosyltransferase	449,Alpha-L-Rha alpha-1,3-L-rhamnosyltransferase	155,Alpha-L-Rha alpha-1,3-L-rhamnosyltransferase	250,Alpha-L-Rha alpha-1,3-L-rhamnosyltransferase	19,Alpha-L-Rha alpha-1,3-L-rhamnosyltransferase	1635,Alpha-L-Rha alpha-1,3-L-rhamnosyltransferase	1623,Alpha-L-Rha alpha-1,3-L-rhamnosyltransferase	321,Alpha-L-Rha alpha-1,3-L-rhamnosyltransferase
9,Probable aromatic ring hydroxylating enzyme, evidenced by COGnitor; PaaD-like protein (DUF59) involved in Fe-S cluster assembly	55,Probable aromatic ring hydroxylating enzyme, evidenced by COGnitor; PaaD-like protein (DUF59) involved in Fe-S cluster assembly	273,Probable aromatic ring hydroxylating enzyme, evidenced by COGnitor; PaaD-like protein (DUF59) involved in Fe-S cluster assembly	343,Probable aromatic ring hydroxylating enzyme, evidenced by COGnitor; PaaD-like protein (DUF59) involved in Fe-S cluster assembly	1721,Probable aromatic ring hydroxylating enzyme, evidenced by COGnitor; PaaD-like protein (DUF59) involved in Fe-S cluster assembly	1662,Probable aromatic ring hydroxylating enzyme, evidenced by COGnitor; PaaD-like protein (DUF59) involved in Fe-S cluster assembly	1787,Probable aromatic ring hydroxylating enzyme, evidenced by COGnitor; PaaD-like protein (DUF59) involved in Fe-S cluster assembly	1810,Probable aromatic ring hydroxylating enzyme, evidenced by COGnitor; PaaD-like protein (DUF59) involved in Fe-S cluster assembly	1623,Probable aromatic ring hydroxylating enzyme, evidenced by COGnitor; PaaD-like protein (DUF59) involved in Fe-S cluster assembly	1565,Probable aromatic ring hydroxylating enzyme, evidenced by COGnitor; PaaD-like protein (DUF59) involved in Fe-S cluster assembly	1575,Probable aromatic ring hydroxylating enzyme, evidenced by COGnitor; PaaD-like protein (DUF59) involved in Fe-S cluster assembly	1690,Probable aromatic ring hydroxylating enzyme, evidenced by COGnitor; PaaD-like protein (DUF59) involved in Fe-S cluster assembly	1512,Probable aromatic ring hydroxylating enzyme, evidenced by COGnitor; PaaD-like protein (DUF59) involved in Fe-S cluster assembly	450,Probable aromatic ring hydroxylating enzyme, evidenced by COGnitor; PaaD-like protein (DUF59) involved in Fe-S cluster assembly	156,Probable aromatic ring hydroxylating enzyme, evidenced by COGnitor; PaaD-like protein (DUF59) involved in Fe-S cluster assembly	251,Probable aromatic ring hydroxylating enzyme, evidenced by COGnitor; PaaD-like protein (DUF59) involved in Fe-S cluster assembly	20,Probable aromatic ring hydroxylating enzyme, evidenced by COGnitor; PaaD-like protein (DUF59) involved in Fe-S cluster assembly	1636,Probable aromatic ring hydroxylating enzyme, evidenced by COGnitor; PaaD-like protein (DUF59) involved in Fe-S cluster assembly	1624,Probable aromatic ring hydroxylating enzyme, evidenced by COGnitor; PaaD-like protein (DUF59) involved in Fe-S cluster assembly	320,Probable aromatic ring hydroxylating enzyme, evidenced by COGnitor; PaaD-like protein (DUF59) involved in Fe-S cluster assembly
10,RNA polymerase sigma factor RpoD	54,RNA polymerase sigma factor RpoD	274,RNA polymerase sigma factor RpoD	342,RNA polymerase sigma factor RpoD	1720,RNA polymerase sigma factor RpoD	1663,RNA polymerase sigma factor RpoD	1788,RNA polymerase sigma factor RpoD	1809,RNA polymerase sigma factor RpoD	1624,RNA polymerase sigma factor RpoD	1566,RNA polymerase sigma factor RpoD	1576,RNA polymerase sigma factor RpoD	1689,RNA polymerase sigma factor RpoD	1511,RNA polymerase sigma factor RpoD	452,RNA polymerase sigma factor RpoD	157,RNA polymerase sigma factor RpoD	252,RNA polymerase sigma factor RpoD	21,RNA polymerase sigma factor RpoD	1637,RNA polymerase sigma factor RpoD	1625,RNA polymerase sigma factor RpoD	319,RNA polymerase sigma factor RpoD
11,DNA primase	53,DNA primase	275,DNA primase	341,DNA primase	1719,DNA primase	1664,DNA primase	1789,DNA primase	1808,DNA primase	1625,DNA primase	1567,DNA primase	1577,DNA primase	1688,DNA primase	1510,DNA primase	453,DNA primase	158,DNA primase	253,DNA primase	22,DNA primase	1638,DNA primase	1626,DNA primase	318,DNA primase
12,Large-conductance mechanosensitive channel	52,Large-conductance mechanosensitive channel	276,Large-conductance mechanosensitive channel	340,Large-conductance mechanosensitive channel	1718,Large-conductance mechanosensitive channel	1665,Large-conductance mechanosensitive channel	1790,Large-conductance mechanosensitive channel	1807,Large-conductance mechanosensitive channel	1626,Large-conductance mechanosensitive channel	1568,Large-conductance mechanosensitive channel	1578,Large-conductance mechanosensitive channel	1687,Large-conductance mechanosensitive channel	1509,Large-conductance mechanosensitive channel	454,Large-conductance mechanosensitive channel	159,Large-conductance mechanosensitive channel	254,Large-conductance mechanosensitive channel	23,Large-conductance mechanosensitive channel	1639,Large-conductance mechanosensitive channel	1627,Large-conductance mechanosensitive channel	317,Large-conductance mechanosensitive channel
13,SSU ribosomal protein S21p	51,SSU ribosomal protein S21p	277,SSU ribosomal protein S21p	338,SSU ribosomal protein S21p	1716,SSU ribosomal protein S21p	1667,SSU ribosomal protein S21p	1791,SSU ribosomal protein S21p	1806,SSU ribosomal protein S21p	1627,SSU ribosomal protein S21p	1569,SSU ribosomal protein S21p	1579,SSU ribosomal protein S21p	1685,SSU ribosomal protein S21p	1508,SSU ribosomal protein S21p	455,SSU ribosomal protein S21p	160,SSU ribosomal protein S21p	255,SSU ribosomal protein S21p	24,SSU ribosomal protein S21p	1641,SSU ribosomal protein S21p	1629,SSU ribosomal protein S21p	316,SSU ribosomal protein S21p
14,ATP-dependent nuclease, subunit A	50,ATP-dependent nuclease, subunit A	278,ATP-dependent nuclease, subunit A	337,ATP-dependent nuclease, subunit A	1715,ATP-dependent nuclease, subunit A	1668,ATP-dependent nuclease, subunit A	1792,ATP-dependent nuclease, subunit A	1177,ATP-dependent nuclease, subunit A	1628,ATP-dependent nuclease, subunit A	1570,ATP-dependent nuclease, subunit A	1580,ATP-dependent nuclease, subunit A	1684,ATP-dependent nuclease, subunit A	1507,ATP-dependent nuclease, subunit A	456,ATP-dependent nuclease, subunit A	161,ATP-dependent nuclease, subunit A	256,ATP-dependent nuclease, subunit A	25,ATP-dependent nuclease, subunit A	1642,ATP-dependent nuclease, subunit A	1630,ATP-dependent nuclease, subunit A	1500,ATP-dependent nuclease, subunit A
15,ATP-dependent nuclease, subunit B	49,ATP-dependent nuclease, subunit B	279,ATP-dependent nuclease, subunit B	336,ATP-dependent nuclease, subunit B	1714,ATP-dependent nuclease, subunit B	1669,ATP-dependent nuclease, subunit B	1793,ATP-dependent nuclease, subunit B	1176,ATP-dependent nuclease, subunit B	1629,ATP-dependent nuclease, subunit B	1571,ATP-dependent nuclease, subunit B	1581,ATP-dependent nuclease, subunit B	1683,ATP-dependent nuclease, subunit B	1506,ATP-dependent nuclease, subunit B	457,ATP-dependent nuclease, subunit B	162,ATP-dependent nuclease, subunit B	257,ATP-dependent nuclease, subunit B	26,ATP-dependent nuclease, subunit B	1643,ATP-dependent nuclease, subunit B	1631,ATP-dependent nuclease, subunit B	1501,ATP-dependent nuclease, subunit B
16,Sortase A, LPXTG specific	48,Sortase A, LPXTG specific	282,Sortase A, LPXTG specific	334,Sortase A, LPXTG specific	1712,Sortase A, LPXTG specific	1671,Sortase A, LPXTG specific	1795,Sortase A, LPXTG specific	1173,Sortase A, LPXTG specific	1632,Sortase A, LPXTG specific	1574,Sortase A, LPXTG specific	1584,Sortase A, LPXTG specific	1681,Sortase A, LPXTG specific	1503,Sortase A, LPXTG specific	459,Sortase A, LPXTG specific	163,Sortase A, LPXTG specific	259,Sortase A, LPXTG specific	27,Sortase A, LPXTG specific	1645,Sortase A, LPXTG specific	1633,Sortase A, LPXTG specific	1503,Sortase A, LPXTG specific
17,Cell wall surface anchor family protein	47,Cell wall surface anchor family protein	283,Cell wall surface anchor family protein	333,Cell wall surface anchor family protein	1711,Cell wall surface anchor family protein	1672,Cell wall surface anchor family protein	1796,Cell wall surface anchor family protein	1172,Cell wall surface anchor family protein	1633,Cell wall surface anchor family protein	1575,Cell wall surface anchor family protein	1585,Cell wall surface anchor family protein	1680,Cell wall surface anchor family protein	1502,Cell wall surface anchor family protein	460,Cell wall surface anchor family protein	164,Cell wall surface anchor family protein	260,Cell wall surface anchor family protein	28,Cell wall surface anchor family protein	1646,Cell wall surface anchor family protein	1634,Cell wall surface anchor family protein	1504,Cell wall surface anchor family protein
18,Cell wall surface anchor family protein	46,Cell wall surface anchor family protein	284,Cell wall surface anchor family protein	332,Cell wall surface anchor family protein	1710,Cell wall surface anchor family protein	1673,Cell wall surface anchor family protein	1797,Cell wall surface anchor family protein	1171,Cell wall surface anchor family protein	1634,Cell wall surface anchor family protein	1576,Cell wall surface anchor family protein	1586,Cell wall surface anchor family protein	1679,Cell wall surface anchor family protein	1501,Cell wall surface anchor family protein	461,Cell wall surface anchor family protein	165,Cell wall surface anchor family protein	261,Cell wall surface anchor family protein	29,Cell wall surface anchor family protein	1647,Cell wall surface anchor family protein	1635,Cell wall surface anchor family protein	1505,Cell wall surface anchor family protein
19,Signal peptidase I	45,Signal peptidase I	285,Signal peptidase I	331,Signal peptidase I	1709,Signal peptidase I	1674,Signal peptidase I	1798,Signal peptidase I	1170,Signal peptidase I	1635,Signal peptidase I	1577,Signal peptidase I	1587,Signal peptidase I	1678,Signal peptidase I	1500,Signal peptidase I	462,Signal peptidase I	166,Signal peptidase I	262,Signal peptidase I	30,Signal peptidase I	1648,Signal peptidase I	1636,Signal peptidase I	1506,Signal peptidase I
20,hypothetical protein	44,hypothetical protein	286,hypothetical protein	330,hypothetical protein	1708,hypothetical protein	1675,hypothetical protein	1799,hypothetical protein	1169,hypothetical protein	1636,hypothetical protein	1578,hypothetical protein	1588,hypothetical protein	1677,hypothetical protein	1499,hypothetical protein	463,hypothetical protein	167,hypothetical protein	263,hypothetical protein	31,hypothetical protein	1649,hypothetical protein	1637,hypothetical protein	1507,hypothetical protein
21,hypothetical protein	- , -	242,hypothetical protein	329,hypothetical protein	1707,hypothetical protein	1676,hypothetical protein	1800,hypothetical protein	- , -	- , -	- , -	- , -	1676,hypothetical protein	- , -	464,hypothetical protein	168,hypothetical protein	264,hypothetical protein	32,hypothetical protein	1650,hypothetical protein	1638,hypothetical protein	1508,hypothetical protein
22,DNA-3-methyladenine glycosylase II	42,DNA-3-methyladenine glycosylase II	241,DNA-3-methyladenine glycosylase II	327,DNA-3-methyladenine glycosylase II	1705,DNA-3-methyladenine glycosylase II	1678,DNA-3-methyladenine glycosylase II	1802,DNA-3-methyladenine glycosylase II	476,DNA-3-methyladenine glycosylase II	407,DNA-3-methyladenine glycosylase II	433,DNA-3-methyladenine glycosylase II	397,DNA-3-methyladenine glycosylase II	1674,DNA-3-methyladenine glycosylase II	395,DNA-3-methyladenine glycosylase II	465,DNA-3-methyladenine glycosylase II	169,DNA-3-methyladenine glycosylase II	265,DNA-3-methyladenine glycosylase II	34,DNA-3-methyladenine glycosylase II	1652,DNA-3-methyladenine glycosylase II	1640,DNA-3-methyladenine glycosylase II	1510,DNA-3-methyladenine glycosylase II
23,Phenylalanyl-tRNA synthetase beta chain	41,Phenylalanyl-tRNA synthetase beta chain	240,Phenylalanyl-tRNA synthetase beta chain	326,Phenylalanyl-tRNA synthetase beta chain	1704,Phenylalanyl-tRNA synthetase beta chain	1679,Phenylalanyl-tRNA synthetase beta chain	1803,Phenylalanyl-tRNA synthetase beta chain	477,Phenylalanyl-tRNA synthetase beta chain	408,Phenylalanyl-tRNA synthetase beta chain	432,Phenylalanyl-tRNA synthetase beta chain	396,Phenylalanyl-tRNA synthetase beta chain	1673,Phenylalanyl-tRNA synthetase beta chain	394,Phenylalanyl-tRNA synthetase beta chain	466,Phenylalanyl-tRNA synthetase beta chain	170,Phenylalanyl-tRNA synthetase beta chain	266,Phenylalanyl-tRNA synthetase beta chain	35,Phenylalanyl-tRNA synthetase beta chain	1653,Phenylalanyl-tRNA synthetase beta chain	1641,Phenylalanyl-tRNA synthetase beta chain	1511,Phenylalanyl-tRNA synthetase beta chain
24,Phenylalanyl-tRNA synthetase alpha chain	40,Phenylalanyl-tRNA synthetase alpha chain	239,Phenylalanyl-tRNA synthetase alpha chain	325,Phenylalanyl-tRNA synthetase alpha chain	1703,Phenylalanyl-tRNA synthetase alpha chain	1680,Phenylalanyl-tRNA synthetase alpha chain	1804,Phenylalanyl-tRNA synthetase alpha chain	478,Phenylalanyl-tRNA synthetase alpha chain	409,Phenylalanyl-tRNA synthetase alpha chain	431,Phenylalanyl-tRNA synthetase alpha chain	395,Phenylalanyl-tRNA synthetase alpha chain	1672,Phenylalanyl-tRNA synthetase alpha chain	393,Phenylalanyl-tRNA synthetase alpha chain	467,Phenylalanyl-tRNA synthetase alpha chain	171,Phenylalanyl-tRNA synthetase alpha chain	267,Phenylalanyl-tRNA synthetase alpha chain	36,Phenylalanyl-tRNA synthetase alpha chain	1654,Phenylalanyl-tRNA synthetase alpha chain	1642,Phenylalanyl-tRNA synthetase alpha chain	1512,Phenylalanyl-tRNA synthetase alpha chain
25,DNA-entry nuclease (Competence-specific nuclease)	39,DNA-entry nuclease (Competence-specific nuclease)	238,DNA-entry nuclease (Competence-specific nuclease)	324,DNA-entry nuclease (Competence-specific nuclease)	1702,DNA-entry nuclease (Competence-specific nuclease)	1681,DNA-entry nuclease (Competence-specific nuclease)	1805,DNA-entry nuclease (Competence-specific nuclease)	479,DNA-entry nuclease (Competence-specific nuclease)	410,DNA-entry nuclease (Competence-specific nuclease)	430,DNA-entry nuclease (Competence-specific nuclease)	394,DNA-entry nuclease (Competence-specific nuclease)	1671,DNA-entry nuclease (Competence-specific nuclease)	392,DNA-entry nuclease (Competence-specific nuclease)	468,DNA-entry nuclease (Competence-specific nuclease)	172,DNA-entry nuclease (Competence-specific nuclease)	268,DNA-entry nuclease (Competence-specific nuclease)	37,DNA-entry nuclease (Competence-specific nuclease)	1655,DNA-entry nuclease (Competence-specific nuclease)	1643,DNA-entry nuclease (Competence-specific nuclease)	1513,DNA-entry nuclease (Competence-specific nuclease)
26,Competence-associated EpuA protein	38,Competence-associated EpuA protein	237,Competence-associated EpuA protein	323,Competence-associated EpuA protein	1701,Competence-associated EpuA protein	1682,Competence-associated EpuA protein	1806,Competence-associated EpuA protein	480,Competence-associated EpuA protein	411,Competence-associated EpuA protein	429,Competence-associated EpuA protein	393,Competence-associated EpuA protein	1670,Competence-associated EpuA protein	391,Competence-associated EpuA protein	469,Competence-associated EpuA protein	173,Competence-associated EpuA protein	269,Competence-associated EpuA protein	38,Competence-associated EpuA protein	1656,Competence-associated EpuA protein	1644,Competence-associated EpuA protein	1514,Competence-associated EpuA protein
27,UDP-N-acetylglucosamine 1-carboxyvinyltransferase	37,UDP-N-acetylglucosamine 1-carboxyvinyltransferase	236,UDP-N-acetylglucosamine 1-carboxyvinyltransferase	322,UDP-N-acetylglucosamine 1-carboxyvinyltransferase	1700,UDP-N-acetylglucosamine 1-carboxyvinyltransferase	1683,UDP-N-acetylglucosamine 1-carboxyvinyltransferase	1807,UDP-N-acetylglucosamine 1-carboxyvinyltransferase	481,UDP-N-acetylglucosamine 1-carboxyvinyltransferase	412,UDP-N-acetylglucosamine 1-carboxyvinyltransferase	428,UDP-N-acetylglucosamine 1-carboxyvinyltransferase	392,UDP-N-acetylglucosamine 1-carboxyvinyltransferase	1669,UDP-N-acetylglucosamine 1-carboxyvinyltransferase	390,UDP-N-acetylglucosamine 1-carboxyvinyltransferase	470,UDP-N-acetylglucosamine 1-carboxyvinyltransferase	174,UDP-N-acetylglucosamine 1-carboxyvinyltransferase	270,UDP-N-acetylglucosamine 1-carboxyvinyltransferase	39,UDP-N-acetylglucosamine 1-carboxyvinyltransferase	1657,UDP-N-acetylglucosamine 1-carboxyvinyltransferase	1645,UDP-N-acetylglucosamine 1-carboxyvinyltransferase	1515,UDP-N-acetylglucosamine 1-carboxyvinyltransferase
28,FIG01114865: hypothetical protein	36,FIG01114865: hypothetical protein	235,FIG01114865: hypothetical protein	321,FIG01114865: hypothetical protein	1699,FIG01114865: hypothetical protein	1684,FIG01114865: hypothetical protein	1808,FIG01114865: hypothetical protein	482,FIG01114865: hypothetical protein	413,FIG01114865: hypothetical protein	427,FIG01114865: hypothetical protein	391,FIG01114865: hypothetical protein	1668,FIG01114865: hypothetical protein	389,FIG01114865: hypothetical protein	471,FIG01114865: hypothetical protein	175,FIG01114865: hypothetical protein	271,FIG01114865: hypothetical protein	40,FIG01114865: hypothetical protein	1658,FIG01114865: hypothetical protein	1646,FIG01114865: hypothetical protein	1516,FIG01114865: hypothetical protein
29,ATP synthase epsilon chain	35,ATP synthase epsilon chain	234,ATP synthase epsilon chain	320,ATP synthase epsilon chain	1698,ATP synthase epsilon chain	1685,ATP synthase epsilon chain	1809,ATP synthase epsilon chain	483,ATP synthase epsilon chain	414,ATP synthase epsilon chain	426,ATP synthase epsilon chain	390,ATP synthase epsilon chain	1667,ATP synthase epsilon chain	388,ATP synthase epsilon chain	472,ATP synthase epsilon chain	284,ATP synthase epsilon chain	272,ATP synthase epsilon chain	41,ATP synthase epsilon chain	1659,ATP synthase epsilon chain	1647,ATP synthase epsilon chain	1517,ATP synthase epsilon chain
30,ATP synthase beta chain	34,ATP synthase beta chain	233,ATP synthase beta chain	319,ATP synthase beta chain	1697,ATP synthase beta chain	1686,ATP synthase beta chain	1810,ATP synthase beta chain	484,ATP synthase beta chain	415,ATP synthase beta chain	425,ATP synthase beta chain	389,ATP synthase beta chain	1666,ATP synthase beta chain	387,ATP synthase beta chain	473,ATP synthase beta chain	285,ATP synthase beta chain	273,ATP synthase beta chain	42,ATP synthase beta chain	1660,ATP synthase beta chain	1648,ATP synthase beta chain	1518,ATP synthase beta chain
31,ATP synthase gamma chain	33,ATP synthase gamma chain	232,ATP synthase gamma chain	318,ATP synthase gamma chain	1696,ATP synthase gamma chain	1687,ATP synthase gamma chain	1811,ATP synthase gamma chain	485,ATP synthase gamma chain	416,ATP synthase gamma chain	424,ATP synthase gamma chain	388,ATP synthase gamma chain	1665,ATP synthase gamma chain	386,ATP synthase gamma chain	474,ATP synthase gamma chain	286,ATP synthase gamma chain	274,ATP synthase gamma chain	43,ATP synthase gamma chain	1661,ATP synthase gamma chain	1649,ATP synthase gamma chain	1519,ATP synthase gamma chain
32,ATP synthase alpha chain	32,ATP synthase alpha chain	231,ATP synthase alpha chain	317,ATP synthase alpha chain	1695,ATP synthase alpha chain	1688,ATP synthase alpha chain	1812,ATP synthase alpha chain	486,ATP synthase alpha chain	417,ATP synthase alpha chain	423,ATP synthase alpha chain	387,ATP synthase alpha chain	1664,ATP synthase alpha chain	385,ATP synthase alpha chain	475,ATP synthase alpha chain	287,ATP synthase alpha chain	275,ATP synthase alpha chain	44,ATP synthase alpha chain	1662,ATP synthase alpha chain	1650,ATP synthase alpha chain	1520,ATP synthase alpha chain
33,ATP synthase delta chain	31,ATP synthase delta chain	230,ATP synthase delta chain	316,ATP synthase delta chain	1694,ATP synthase delta chain	1689,ATP synthase delta chain	1813,ATP synthase delta chain	487,ATP synthase delta chain	418,ATP synthase delta chain	422,ATP synthase delta chain	386,ATP synthase delta chain	1663,ATP synthase delta chain	384,ATP synthase delta chain	476,ATP synthase delta chain	288,ATP synthase delta chain	276,ATP synthase delta chain	45,ATP synthase delta chain	1663,ATP synthase delta chain	1651,ATP synthase delta chain	1521,ATP synthase delta chain
34,ATP synthase F0 sector subunit b	30,ATP synthase F0 sector subunit b	229,ATP synthase F0 sector subunit b	315,ATP synthase F0 sector subunit b	1693,ATP synthase F0 sector subunit b	1690,ATP synthase F0 sector subunit b	1814,ATP synthase F0 sector subunit b	488,ATP synthase F0 sector subunit b	419,ATP synthase F0 sector subunit b	421,ATP synthase F0 sector subunit b	385,ATP synthase F0 sector subunit b	1662,ATP synthase F0 sector subunit b	383,ATP synthase F0 sector subunit b	477,ATP synthase F0 sector subunit b	289,ATP synthase F0 sector subunit b	277,ATP synthase F0 sector subunit b	46,ATP synthase F0 sector subunit b	1664,ATP synthase F0 sector subunit b	1652,ATP synthase F0 sector subunit b	1522,ATP synthase F0 sector subunit b
35,ATP synthase F0 sector subunit a	29,ATP synthase F0 sector subunit a	228,ATP synthase F0 sector subunit a	314,ATP synthase F0 sector subunit a	1692,ATP synthase F0 sector subunit a	1691,ATP synthase F0 sector subunit a	1815,ATP synthase F0 sector subunit a	489,ATP synthase F0 sector subunit a	420,ATP synthase F0 sector subunit a	420,ATP synthase F0 sector subunit a	384,ATP synthase F0 sector subunit a	1661,ATP synthase F0 sector subunit a	382,ATP synthase F0 sector subunit a	478,ATP synthase F0 sector subunit a	290,ATP synthase F0 sector subunit a	278,ATP synthase F0 sector subunit a	47,ATP synthase F0 sector subunit a	1665,ATP synthase F0 sector subunit a	1653,ATP synthase F0 sector subunit a	1523,ATP synthase F0 sector subunit a
36,ATP synthase F0 sector subunit c	28,ATP synthase F0 sector subunit c	227,ATP synthase F0 sector subunit c	313,ATP synthase F0 sector subunit c	1691,ATP synthase F0 sector subunit c	1692,ATP synthase F0 sector subunit c	1816,ATP synthase F0 sector subunit c	490,ATP synthase F0 sector subunit c	421,ATP synthase F0 sector subunit c	419,ATP synthase F0 sector subunit c	383,ATP synthase F0 sector subunit c	1660,ATP synthase F0 sector subunit c	381,ATP synthase F0 sector subunit c	479,ATP synthase F0 sector subunit c	291,ATP synthase F0 sector subunit c	279,ATP synthase F0 sector subunit c	48,ATP synthase F0 sector subunit c	1666,ATP synthase F0 sector subunit c	1654,ATP synthase F0 sector subunit c	1524,ATP synthase F0 sector subunit c
37,hypothetical protein	27,hypothetical protein	226,hypothetical protein	312,hypothetical protein	1690,hypothetical protein	1693,hypothetical protein	1817,hypothetical protein	491,hypothetical protein	422,hypothetical protein	418,hypothetical protein	382,hypothetical protein	1659,hypothetical protein	380,hypothetical protein	480,hypothetical protein	292,hypothetical protein	280,hypothetical protein	49,hypothetical protein	1667,hypothetical protein	1655,hypothetical protein	1525,hypothetical protein
38,Glycogen synthase, ADP-glucose transglucosylase	26,Glycogen synthase, ADP-glucose transglucosylase	225,Glycogen synthase, ADP-glucose transglucosylase	311,Glycogen synthase, ADP-glucose transglucosylase	1689,Glycogen synthase, ADP-glucose transglucosylase	1694,Glycogen synthase, ADP-glucose transglucosylase	1818,Glycogen synthase, ADP-glucose transglucosylase	492,Glycogen synthase, ADP-glucose transglucosylase	423,Glycogen synthase, ADP-glucose transglucosylase	417,Glycogen synthase, ADP-glucose transglucosylase	381,Glycogen synthase, ADP-glucose transglucosylase	1658,Glycogen synthase, ADP-glucose transglucosylase	379,Glycogen synthase, ADP-glucose transglucosylase	481,Glycogen synthase, ADP-glucose transglucosylase	293,Glycogen synthase, ADP-glucose transglucosylase	281,Glycogen synthase, ADP-glucose transglucosylase	50,Glycogen synthase, ADP-glucose transglucosylase	1668,Glycogen synthase, ADP-glucose transglucosylase	1656,Glycogen synthase, ADP-glucose transglucosylase	1526,Glycogen synthase, ADP-glucose transglucosylase
39,Glycogen biosynthesis protein GlgD, glucose-1-phosphate adenylyltransferase family	25,Glycogen biosynthesis protein GlgD, glucose-1-phosphate adenylyltransferase family	224,Glycogen biosynthesis protein GlgD, glucose-1-phosphate adenylyltransferase family	310,Glycogen biosynthesis protein GlgD, glucose-1-phosphate adenylyltransferase family	1688,Glycogen biosynthesis protein GlgD, glucose-1-phosphate adenylyltransferase family	1695,Glycogen biosynthesis protein GlgD, glucose-1-phosphate adenylyltransferase family	1819,Glycogen biosynthesis protein GlgD, glucose-1-phosphate adenylyltransferase family	493,Glycogen biosynthesis protein GlgD, glucose-1-phosphate adenylyltransferase family	424,Glycogen biosynthesis protein GlgD, glucose-1-phosphate adenylyltransferase family	416,Glycogen biosynthesis protein GlgD, glucose-1-phosphate adenylyltransferase family	380,Glycogen biosynthesis protein GlgD, glucose-1-phosphate adenylyltransferase family	1657,Glycogen biosynthesis protein GlgD, glucose-1-phosphate adenylyltransferase family	378,Glycogen biosynthesis protein GlgD, glucose-1-phosphate adenylyltransferase family	482,Glycogen biosynthesis protein GlgD, glucose-1-phosphate adenylyltransferase family	294,Glycogen biosynthesis protein GlgD, glucose-1-phosphate adenylyltransferase family	282,Glycogen biosynthesis protein GlgD, glucose-1-phosphate adenylyltransferase family	51,Glycogen biosynthesis protein GlgD, glucose-1-phosphate adenylyltransferase family	1669,Glycogen biosynthesis protein GlgD, glucose-1-phosphate adenylyltransferase family	1657,Glycogen biosynthesis protein GlgD, glucose-1-phosphate adenylyltransferase family	1527,Glycogen biosynthesis protein GlgD, glucose-1-phosphate adenylyltransferase family
40,Glucose-1-phosphate adenylyltransferase	24,Glucose-1-phosphate adenylyltransferase	223,Glucose-1-phosphate adenylyltransferase	309,Glucose-1-phosphate adenylyltransferase	1687,Glucose-1-phosphate adenylyltransferase	1696,Glucose-1-phosphate adenylyltransferase	1820,Glucose-1-phosphate adenylyltransferase	494,Glucose-1-phosphate adenylyltransferase	425,Glucose-1-phosphate adenylyltransferase	415,Glucose-1-phosphate adenylyltransferase	379,Glucose-1-phosphate adenylyltransferase	1656,Glucose-1-phosphate adenylyltransferase	377,Glucose-1-phosphate adenylyltransferase	483,Glucose-1-phosphate adenylyltransferase	295,Glucose-1-phosphate adenylyltransferase	283,Glucose-1-phosphate adenylyltransferase	52,Glucose-1-phosphate adenylyltransferase	1670,Glucose-1-phosphate adenylyltransferase	1658,Glucose-1-phosphate adenylyltransferase	1528,Glucose-1-phosphate adenylyltransferase
41,1,4-alpha-glucan (glycogen) branching enzyme, GH-13-type	23,1,4-alpha-glucan (glycogen) branching enzyme, GH-13-type	222,1,4-alpha-glucan (glycogen) branching enzyme, GH-13-type	308,1,4-alpha-glucan (glycogen) branching enzyme, GH-13-type	1686,1,4-alpha-glucan (glycogen) branching enzyme, GH-13-type	1697,1,4-alpha-glucan (glycogen) branching enzyme, GH-13-type	1821,1,4-alpha-glucan (glycogen) branching enzyme, GH-13-type	495,1,4-alpha-glucan (glycogen) branching enzyme, GH-13-type	426,1,4-alpha-glucan (glycogen) branching enzyme, GH-13-type	414,1,4-alpha-glucan (glycogen) branching enzyme, GH-13-type	378,1,4-alpha-glucan (glycogen) branching enzyme, GH-13-type	1655,1,4-alpha-glucan (glycogen) branching enzyme, GH-13-type	376,1,4-alpha-glucan (glycogen) branching enzyme, GH-13-type	484,1,4-alpha-glucan (glycogen) branching enzyme, GH-13-type	296,1,4-alpha-glucan (glycogen) branching enzyme, GH-13-type	284,1,4-alpha-glucan (glycogen) branching enzyme, GH-13-type	53,1,4-alpha-glucan (glycogen) branching enzyme, GH-13-type	1671,1,4-alpha-glucan (glycogen) branching enzyme, GH-13-type	1659,1,4-alpha-glucan (glycogen) branching enzyme, GH-13-type	1529,1,4-alpha-glucan (glycogen) branching enzyme, GH-13-type
42,Glycogen debranching enzyme / Pullulanase	22,Glycogen debranching enzyme / Pullulanase	221,Glycogen debranching enzyme / Pullulanase	307,Glycogen debranching enzyme / Pullulanase	1685,Glycogen debranching enzyme / Pullulanase	1698,Glycogen debranching enzyme / Pullulanase	1822,Glycogen debranching enzyme / Pullulanase	496,Glycogen debranching enzyme / Pullulanase	427,Glycogen debranching enzyme / Pullulanase	413,Glycogen debranching enzyme / Pullulanase	377,Glycogen debranching enzyme / Pullulanase	1654,Glycogen debranching enzyme / Pullulanase	375,Glycogen debranching enzyme / Pullulanase	485,Glycogen debranching enzyme / Pullulanase	297,Glycogen debranching enzyme / Pullulanase	285,Glycogen debranching enzyme / Pullulanase	54,Glycogen debranching enzyme / Pullulanase	1672,Glycogen debranching enzyme / Pullulanase	1660,Glycogen debranching enzyme / Pullulanase	1530,Glycogen debranching enzyme / Pullulanase
43,Transcription regulator [contains diacylglycerol kinase catalytic domain]	21,Transcription regulator [contains diacylglycerol kinase catalytic domain]	220,Transcription regulator [contains diacylglycerol kinase catalytic domain]	306,Transcription regulator [contains diacylglycerol kinase catalytic domain]	1684,Transcription regulator [contains diacylglycerol kinase catalytic domain]	1699,Transcription regulator [contains diacylglycerol kinase catalytic domain]	1823,Transcription regulator [contains diacylglycerol kinase catalytic domain]	497,Transcription regulator [contains diacylglycerol kinase catalytic domain]	428,Transcription regulator [contains diacylglycerol kinase catalytic domain]	412,Transcription regulator [contains diacylglycerol kinase catalytic domain]	376,Transcription regulator [contains diacylglycerol kinase catalytic domain]	1653,Transcription regulator [contains diacylglycerol kinase catalytic domain]	374,Transcription regulator [contains diacylglycerol kinase catalytic domain]	486,Transcription regulator [contains diacylglycerol kinase catalytic domain]	298,Transcription regulator [contains diacylglycerol kinase catalytic domain]	286,Transcription regulator [contains diacylglycerol kinase catalytic domain]	55,Transcription regulator [contains diacylglycerol kinase catalytic domain]	1673,Transcription regulator [contains diacylglycerol kinase catalytic domain]	1661,Transcription regulator [contains diacylglycerol kinase catalytic domain]	1531,Transcription regulator [contains diacylglycerol kinase catalytic domain]
44,DNA ligase	20,DNA ligase	219,DNA ligase	305,DNA ligase	1683,DNA ligase	1700,DNA ligase	1824,DNA ligase	498,DNA ligase	429,DNA ligase	411,DNA ligase	375,DNA ligase	1652,DNA ligase	373,DNA ligase	487,DNA ligase	299,DNA ligase	287,DNA ligase	56,DNA ligase	1674,DNA ligase	1662,DNA ligase	1532,DNA ligase
45,Substrate-specific component QueT (COG4708) of predicted queuosine-regulated ECF transporter	19,Substrate-specific component QueT (COG4708) of predicted queuosine-regulated ECF transporter	218,Substrate-specific component QueT (COG4708) of predicted queuosine-regulated ECF transporter	138,Substrate-specific component QueT (COG4708) of predicted queuosine-regulated ECF transporter	1682,Substrate-specific component QueT (COG4708) of predicted queuosine-regulated ECF transporter	1701,Substrate-specific component QueT (COG4708) of predicted queuosine-regulated ECF transporter	1825,Substrate-specific component QueT (COG4708) of predicted queuosine-regulated ECF transporter	499,Substrate-specific component QueT (COG4708) of predicted queuosine-regulated ECF transporter	430,Substrate-specific component QueT (COG4708) of predicted queuosine-regulated ECF transporter	410,Substrate-specific component QueT (COG4708) of predicted queuosine-regulated ECF transporter	374,Substrate-specific component QueT (COG4708) of predicted queuosine-regulated ECF transporter	1651,Substrate-specific component QueT (COG4708) of predicted queuosine-regulated ECF transporter	372,Substrate-specific component QueT (COG4708) of predicted queuosine-regulated ECF transporter	488,Substrate-specific component QueT (COG4708) of predicted queuosine-regulated ECF transporter	300,Substrate-specific component QueT (COG4708) of predicted queuosine-regulated ECF transporter	288,Substrate-specific component QueT (COG4708) of predicted queuosine-regulated ECF transporter	57,Substrate-specific component QueT (COG4708) of predicted queuosine-regulated ECF transporter	1675,Substrate-specific component QueT (COG4708) of predicted queuosine-regulated ECF transporter	1663,Substrate-specific component QueT (COG4708) of predicted queuosine-regulated ECF transporter	1533,Substrate-specific component QueT (COG4708) of predicted queuosine-regulated ECF transporter
46,V-type ATP synthase subunit D	18,V-type ATP synthase subunit D	217,V-type ATP synthase subunit D	137,V-type ATP synthase subunit D	1681,V-type ATP synthase subunit D	1702,V-type ATP synthase subunit D	1826,V-type ATP synthase subunit D	500,V-type ATP synthase subunit D	431,V-type ATP synthase subunit D	409,V-type ATP synthase subunit D	373,V-type ATP synthase subunit D	1650,V-type ATP synthase subunit D	371,V-type ATP synthase subunit D	329,V-type ATP synthase subunit D	301,V-type ATP synthase subunit D	135,V-type ATP synthase subunit D	58,V-type ATP synthase subunit D	1676,V-type ATP synthase subunit D	1664,V-type ATP synthase subunit D	1534,V-type ATP synthase subunit D
47,V-type ATP synthase subunit B	17,V-type ATP synthase subunit B	216,V-type ATP synthase subunit B	136,V-type ATP synthase subunit B	1680,V-type ATP synthase subunit B	1703,V-type ATP synthase subunit B	1827,V-type ATP synthase subunit B	501,V-type ATP synthase subunit B	432,V-type ATP synthase subunit B	408,V-type ATP synthase subunit B	372,V-type ATP synthase subunit B	1649,V-type ATP synthase subunit B	370,V-type ATP synthase subunit B	328,V-type ATP synthase subunit B	302,V-type ATP synthase subunit B	136,V-type ATP synthase subunit B	59,V-type ATP synthase subunit B	1677,V-type ATP synthase subunit B	1665,V-type ATP synthase subunit B	1535,V-type ATP synthase subunit B
48,V-type ATP synthase subunit A	16,V-type ATP synthase subunit A	215,V-type ATP synthase subunit A	135,V-type ATP synthase subunit A	1679,V-type ATP synthase subunit A	1704,V-type ATP synthase subunit A	1828,V-type ATP synthase subunit A	502,V-type ATP synthase subunit A	433,V-type ATP synthase subunit A	407,V-type ATP synthase subunit A	371,V-type ATP synthase subunit A	1648,V-type ATP synthase subunit A	369,V-type ATP synthase subunit A	327,V-type ATP synthase subunit A	303,V-type ATP synthase subunit A	137,V-type ATP synthase subunit A	60,V-type ATP synthase subunit A	1678,V-type ATP synthase subunit A	1666,V-type ATP synthase subunit A	1536,V-type ATP synthase subunit A
49,V-type ATP synthase subunit F	15,V-type ATP synthase subunit F	214,V-type ATP synthase subunit F	134,V-type ATP synthase subunit F	1678,V-type ATP synthase subunit F	1705,V-type ATP synthase subunit F	1829,V-type ATP synthase subunit F	503,V-type ATP synthase subunit F	434,V-type ATP synthase subunit F	406,V-type ATP synthase subunit F	370,V-type ATP synthase subunit F	1647,V-type ATP synthase subunit F	368,V-type ATP synthase subunit F	326,V-type ATP synthase subunit F	304,V-type ATP synthase subunit F	138,V-type ATP synthase subunit F	61,V-type ATP synthase subunit F	1679,V-type ATP synthase subunit F	1667,V-type ATP synthase subunit F	1537,V-type ATP synthase subunit F
50,V-type ATP synthase subunit C	14,V-type ATP synthase subunit C	213,V-type ATP synthase subunit C	133,V-type ATP synthase subunit C	1677,V-type ATP synthase subunit C	1706,V-type ATP synthase subunit C	1830,V-type ATP synthase subunit C	504,V-type ATP synthase subunit C	435,V-type ATP synthase subunit C	405,V-type ATP synthase subunit C	369,V-type ATP synthase subunit C	1646,V-type ATP synthase subunit C	367,V-type ATP synthase subunit C	325,V-type ATP synthase subunit C	305,V-type ATP synthase subunit C	139,V-type ATP synthase subunit C	62,V-type ATP synthase subunit C	1680,V-type ATP synthase subunit C	1668,V-type ATP synthase subunit C	1538,V-type ATP synthase subunit C
51,V-type ATP synthase subunit E	13,V-type ATP synthase subunit E	212,V-type ATP synthase subunit E	132,V-type ATP synthase subunit E	1676,V-type ATP synthase subunit E	1707,V-type ATP synthase subunit E	1831,V-type ATP synthase subunit E	505,V-type ATP synthase subunit E	436,V-type ATP synthase subunit E	404,V-type ATP synthase subunit E	368,V-type ATP synthase subunit E	1645,V-type ATP synthase subunit E	366,V-type ATP synthase subunit E	324,V-type ATP synthase subunit E	306,V-type ATP synthase subunit E	140,V-type ATP synthase subunit E	63,V-type ATP synthase subunit E	1681,V-type ATP synthase subunit E	1669,V-type ATP synthase subunit E	1539,V-type ATP synthase subunit E
52,V-type ATP synthase subunit K	12,V-type ATP synthase subunit K	211,V-type ATP synthase subunit K	131,V-type ATP synthase subunit K	1675,V-type ATP synthase subunit K	1708,V-type ATP synthase subunit K	1832,V-type ATP synthase subunit K	506,V-type ATP synthase subunit K	437,V-type ATP synthase subunit K	403,V-type ATP synthase subunit K	367,V-type ATP synthase subunit K	1644,V-type ATP synthase subunit K	365,V-type ATP synthase subunit K	323,V-type ATP synthase subunit K	307,V-type ATP synthase subunit K	141,V-type ATP synthase subunit K	64,V-type ATP synthase subunit K	1682,V-type ATP synthase subunit K	1670,V-type ATP synthase subunit K	1540,V-type ATP synthase subunit K
53,V-type ATP synthase subunit I	11,V-type ATP synthase subunit I	210,V-type ATP synthase subunit I	130,V-type ATP synthase subunit I	1674,V-type ATP synthase subunit I	1709,V-type ATP synthase subunit I	1833,V-type ATP synthase subunit I	507,V-type ATP synthase subunit I	438,V-type ATP synthase subunit I	402,V-type ATP synthase subunit I	366,V-type ATP synthase subunit I	1643,V-type ATP synthase subunit I	364,V-type ATP synthase subunit I	322,V-type ATP synthase subunit I	308,V-type ATP synthase subunit I	142,V-type ATP synthase subunit I	65,V-type ATP synthase subunit I	1683,V-type ATP synthase subunit I	1671,V-type ATP synthase subunit I	1541,V-type ATP synthase subunit I
54,V-type ATP synthase subunit G	10,V-type ATP synthase subunit G	209,V-type ATP synthase subunit G	129,V-type ATP synthase subunit G	1673,V-type ATP synthase subunit G	1710,V-type ATP synthase subunit G	1834,hypothetical protein	508,V-type ATP synthase subunit G	439,V-type ATP synthase subunit G	401,V-type ATP synthase subunit G	365,V-type ATP synthase subunit G	1642,V-type ATP synthase subunit G	363,V-type ATP synthase subunit G	321,V-type ATP synthase subunit G	309,V-type ATP synthase subunit G	143,V-type ATP synthase subunit G	66,V-type ATP synthase subunit G	1684,V-type ATP synthase subunit G	1672,V-type ATP synthase subunit G	1542,V-type ATP synthase subunit G
55,Transcriptional regulator pfoR	8,Transcriptional regulator pfoR	208,Transcriptional regulator pfoR	128,Transcriptional regulator pfoR	1672,Transcriptional regulator pfoR	1711,Transcriptional regulator pfoR	1835,Transcriptional regulator pfoR	509,Transcriptional regulator pfoR	440,Transcriptional regulator pfoR	400,Transcriptional regulator pfoR	364,Transcriptional regulator pfoR	1641,Transcriptional regulator pfoR	362,Transcriptional regulator pfoR	320,Transcriptional regulator pfoR	310,Transcriptional regulator pfoR	144,Transcriptional regulator pfoR	68,Transcriptional regulator pfoR	1685,Transcriptional regulator pfoR	1673,Transcriptional regulator pfoR	1543,Transcriptional regulator pfoR
56,Bona fide RidA/YjgF/TdcF/RutC subgroup	7,Bona fide RidA/YjgF/TdcF/RutC subgroup	207,Bona fide RidA/YjgF/TdcF/RutC subgroup	127,Bona fide RidA/YjgF/TdcF/RutC subgroup	1671,Bona fide RidA/YjgF/TdcF/RutC subgroup	1712,Bona fide RidA/YjgF/TdcF/RutC subgroup	1836,Bona fide RidA/YjgF/TdcF/RutC subgroup	510,Bona fide RidA/YjgF/TdcF/RutC subgroup	441,Bona fide RidA/YjgF/TdcF/RutC subgroup	399,Bona fide RidA/YjgF/TdcF/RutC subgroup	363,Bona fide RidA/YjgF/TdcF/RutC subgroup	1640,Bona fide RidA/YjgF/TdcF/RutC subgroup	361,Bona fide RidA/YjgF/TdcF/RutC subgroup	319,Bona fide RidA/YjgF/TdcF/RutC subgroup	311,Bona fide RidA/YjgF/TdcF/RutC subgroup	145,Bona fide RidA/YjgF/TdcF/RutC subgroup	69,Bona fide RidA/YjgF/TdcF/RutC subgroup	1686,Bona fide RidA/YjgF/TdcF/RutC subgroup	1674,Bona fide RidA/YjgF/TdcF/RutC subgroup	1544,Bona fide RidA/YjgF/TdcF/RutC subgroup
57,YheO-like PAS domain	6,YheO-like PAS domain	206,YheO-like PAS domain	126,YheO-like PAS domain	1670,YheO-like PAS domain	1713,YheO-like PAS domain	1837,YheO-like PAS domain	511,YheO-like PAS domain	442,YheO-like PAS domain	398,YheO-like PAS domain	362,YheO-like PAS domain	1639,YheO-like PAS domain	360,YheO-like PAS domain	318,YheO-like PAS domain	312,YheO-like PAS domain	146,YheO-like PAS domain	70,YheO-like PAS domain	1687,YheO-like PAS domain	1675,YheO-like PAS domain	1545,YheO-like PAS domain
58,hypothetical protein	5,hypothetical protein	205,hypothetical protein	125,hypothetical protein	- , -	1714,hypothetical protein	1838,hypothetical protein	512,hypothetical protein	443,hypothetical protein	397,hypothetical protein	361,hypothetical protein	- , -	359,hypothetical protein	317,hypothetical protein	313,hypothetical protein	147,hypothetical protein	71,hypothetical protein	- , -	- , -	1546,hypothetical protein
59,Streptococcal extracellular nuclease 2	4,Streptococcal extracellular nuclease 2	204,Streptococcal extracellular nuclease 2	124,Streptococcal extracellular nuclease 2	1669,Streptococcal extracellular nuclease 2	1715,Streptococcal extracellular nuclease 2	1840,Streptococcal extracellular nuclease 2	513,Streptococcal extracellular nuclease 2	444,Streptococcal extracellular nuclease 2	396,Streptococcal extracellular nuclease 2	360,Streptococcal extracellular nuclease 2	1638,Streptococcal extracellular nuclease 2	358,Streptococcal extracellular nuclease 2	316,Streptococcal extracellular nuclease 2	314,Streptococcal extracellular nuclease 2	148,Streptococcal extracellular nuclease 2	72,Streptococcal extracellular nuclease 2	1688,Streptococcal extracellular nuclease 2	1676,Streptococcal extracellular nuclease 2	1548,Streptococcal extracellular nuclease 2
60,Fibronectin-binding protein	3,Fibronectin-binding protein	- , -	- , -	- , -	- , -	- , -	- , -	- , -	- , -	- , -	- , -	- , -	- , -	315,Fibronectin-binding protein	- , -	73,Secreted fibrinogen-binding protein variant 3	- , -	- , -	- , -
61,RelE/StbE replicon stabilization toxin	2,RelE/StbE replicon stabilization toxin	202,RelE/StbE replicon stabilization toxin	122,RelE/StbE replicon stabilization toxin	1667,RelE/StbE replicon stabilization toxin	734,RelE/StbE replicon stabilization toxin	1842,RelE/StbE replicon stabilization toxin	515,RelE/StbE replicon stabilization toxin	446,RelE/StbE replicon stabilization toxin	394,RelE/StbE replicon stabilization toxin	358,RelE/StbE replicon stabilization toxin	1636,RelE/StbE replicon stabilization toxin	356,RelE/StbE replicon stabilization toxin	313,RelE/StbE replicon stabilization toxin	316,RelE/StbE replicon stabilization toxin	151,RelE/StbE replicon stabilization toxin	74,RelE/StbE replicon stabilization toxin	1690,RelE/StbE replicon stabilization toxin	1678,RelE/StbE replicon stabilization toxin	1552,RelE/StbE replicon stabilization toxin
62,RelB/StbD replicon stabilization protein (antitoxin to RelE/StbE)	1,RelB/StbD replicon stabilization protein (antitoxin to RelE/StbE)	201,RelB/StbD replicon stabilization protein (antitoxin to RelE/StbE)	121,RelB/StbD replicon stabilization protein (antitoxin to RelE/StbE)	1666,RelB/StbD replicon stabilization protein (antitoxin to RelE/StbE)	733,RelB/StbD replicon stabilization protein (antitoxin to RelE/StbE)	1843,RelB/StbD replicon stabilization protein (antitoxin to RelE/StbE)	516,RelB/StbD replicon stabilization protein (antitoxin to RelE/StbE)	447,RelB/StbD replicon stabilization protein (antitoxin to RelE/StbE)	393,RelB/StbD replicon stabilization protein (antitoxin to RelE/StbE)	357,RelB/StbD replicon stabilization protein (antitoxin to RelE/StbE)	1635,RelB/StbD replicon stabilization protein (antitoxin to RelE/StbE)	355,RelB/StbD replicon stabilization protein (antitoxin to RelE/StbE)	312,RelB/StbD replicon stabilization protein (antitoxin to RelE/StbE)	317,RelB/StbD replicon stabilization protein (antitoxin to RelE/StbE)	152,RelB/StbD replicon stabilization protein (antitoxin to RelE/StbE)	75,RelB/StbD replicon stabilization protein (antitoxin to RelE/StbE)	1691,RelB/StbD replicon stabilization protein (antitoxin to RelE/StbE)	1679,RelB/StbD replicon stabilization protein (antitoxin to RelE/StbE)	1553,RelB/StbD replicon stabilization protein (antitoxin to RelE/StbE)
148,Alpha-D-GlcNAc alpha-1,2-L-rhamnosyltransferase	886,Alpha-D-GlcNAc alpha-1,2-L-rhamnosyltransferase	264,Alpha-D-GlcNAc alpha-1,2-L-rhamnosyltransferase	430,Alpha-D-GlcNAc alpha-1,2-L-rhamnosyltransferase	460,Alpha-D-GlcNAc alpha-1,2-L-rhamnosyltransferase	1652,Alpha-D-GlcNAc alpha-1,2-L-rhamnosyltransferase	271,Alpha-D-GlcNAc alpha-1,2-L-rhamnosyltransferase	1819,Alpha-D-GlcNAc alpha-1,2-L-rhamnosyltransferase	1614,Alpha-D-GlcNAc alpha-1,2-L-rhamnosyltransferase	1556,Alpha-D-GlcNAc alpha-1,2-L-rhamnosyltransferase	1566,Alpha-D-GlcNAc alpha-1,2-L-rhamnosyltransferase	368,Alpha-D-GlcNAc alpha-1,2-L-rhamnosyltransferase	1521,Alpha-D-GlcNAc alpha-1,2-L-rhamnosyltransferase	525,Alpha-D-GlcNAc alpha-1,2-L-rhamnosyltransferase	683,Alpha-D-GlcNAc alpha-1,2-L-rhamnosyltransferase	296,Alpha-D-GlcNAc alpha-1,2-L-rhamnosyltransferase	377,Alpha-D-GlcNAc alpha-1,2-L-rhamnosyltransferase	768,Alpha-D-GlcNAc alpha-1,2-L-rhamnosyltransferase	728,Alpha-D-GlcNAc alpha-1,2-L-rhamnosyltransferase	330,Alpha-D-GlcNAc alpha-1,2-L-rhamnosyltransferase
149,Alpha-L-Rha alpha-1,3-L-rhamnosyltransferase	887,Alpha-L-Rha alpha-1,3-L-rhamnosyltransferase	263,Alpha-L-Rha alpha-1,3-L-rhamnosyltransferase	431,Alpha-L-Rha alpha-1,3-L-rhamnosyltransferase	459,Alpha-L-Rha alpha-1,3-L-rhamnosyltransferase	1651,Alpha-L-Rha alpha-1,3-L-rhamnosyltransferase	272,Alpha-L-Rha alpha-1,3-L-rhamnosyltransferase	1820,Alpha-L-Rha alpha-1,3-L-rhamnosyltransferase	1613,Alpha-L-Rha alpha-1,3-L-rhamnosyltransferase	1555,Alpha-L-Rha alpha-1,3-L-rhamnosyltransferase	1565,Alpha-L-Rha alpha-1,3-L-rhamnosyltransferase	367,Alpha-L-Rha alpha-1,3-L-rhamnosyltransferase	1522,Alpha-L-Rha alpha-1,3-L-rhamnosyltransferase	524,Alpha-L-Rha alpha-1,3-L-rhamnosyltransferase	684,Alpha-L-Rha alpha-1,3-L-rhamnosyltransferase	297,Alpha-L-Rha alpha-1,3-L-rhamnosyltransferase	378,Alpha-L-Rha alpha-1,3-L-rhamnosyltransferase	767,Alpha-L-Rha alpha-1,3-L-rhamnosyltransferase	729,Alpha-L-Rha alpha-1,3-L-rhamnosyltransferase	331,Alpha-L-Rha alpha-1,3-L-rhamnosyltransferase
150,Glycosyltransferases involved in cell wall biogenesis	888,Glycosyltransferases involved in cell wall biogenesis	262,Glycosyltransferases involved in cell wall biogenesis	432,Glycosyltransferases involved in cell wall biogenesis	458,Glycosyltransferases involved in cell wall biogenesis	1650,Glycosyltransferases involved in cell wall biogenesis	273,Glycosyltransferases involved in cell wall biogenesis	1821,Glycosyltransferases involved in cell wall biogenesis	1612,Glycosyltransferases involved in cell wall biogenesis	1554,Glycosyltransferases involved in cell wall biogenesis	1564,Glycosyltransferases involved in cell wall biogenesis	366,Glycosyltransferases involved in cell wall biogenesis	1523,Glycosyltransferases involved in cell wall biogenesis	523,Glycosyltransferases involved in cell wall biogenesis	685,Glycosyltransferases involved in cell wall biogenesis	298,Glycosyltransferases involved in cell wall biogenesis	379,Glycosyltransferases involved in cell wall biogenesis	766,Glycosyltransferases involved in cell wall biogenesis	730,Glycosyltransferases involved in cell wall biogenesis	332,Glycosyltransferases involved in cell wall biogenesis
151,DNA for glycosyltransferase, lytic transglycosylase, dTDP-4-rhamnose reductase	889,DNA for glycosyltransferase, lytic transglycosylase, dTDP-4-rhamnose reductase	261,DNA for glycosyltransferase, lytic transglycosylase, dTDP-4-rhamnose reductase	433,DNA for glycosyltransferase, lytic transglycosylase, dTDP-4-rhamnose reductase	457,DNA for glycosyltransferase, lytic transglycosylase, dTDP-4-rhamnose reductase	1649,DNA for glycosyltransferase, lytic transglycosylase, dTDP-4-rhamnose reductase	274,DNA for glycosyltransferase, lytic transglycosylase, dTDP-4-rhamnose reductase	1822,DNA for glycosyltransferase, lytic transglycosylase, dTDP-4-rhamnose reductase	1611,DNA for glycosyltransferase, lytic transglycosylase, dTDP-4-rhamnose reductase	1553,DNA for glycosyltransferase, lytic transglycosylase, dTDP-4-rhamnose reductase	1563,DNA for glycosyltransferase, lytic transglycosylase, dTDP-4-rhamnose reductase	365,DNA for glycosyltransferase, lytic transglycosylase, dTDP-4-rhamnose reductase	1524,DNA for glycosyltransferase, lytic transglycosylase, dTDP-4-rhamnose reductase	522,DNA for glycosyltransferase, lytic transglycosylase, dTDP-4-rhamnose reductase	686,DNA for glycosyltransferase, lytic transglycosylase, dTDP-4-rhamnose reductase	299,DNA for glycosyltransferase, lytic transglycosylase, dTDP-4-rhamnose reductase	380,DNA for glycosyltransferase, lytic transglycosylase, dTDP-4-rhamnose reductase	765,DNA for glycosyltransferase, lytic transglycosylase, dTDP-4-rhamnose reductase	731,DNA for glycosyltransferase, lytic transglycosylase, dTDP-4-rhamnose reductase	333,DNA for glycosyltransferase, lytic transglycosylase, dTDP-4-rhamnose reductase
152,Lipoprotein involved in the synthesis of group B streptococcal carboyhdrate antigen	890,Lipoprotein involved in the synthesis of group B streptococcal carboyhdrate antigen	260,Lipoprotein involved in the synthesis of group B streptococcal carboyhdrate antigen	434,Lipoprotein involved in the synthesis of group B streptococcal carboyhdrate antigen	456,Lipoprotein involved in the synthesis of group B streptococcal carboyhdrate antigen	1648,Lipoprotein involved in the synthesis of group B streptococcal carboyhdrate antigen	275,Lipoprotein involved in the synthesis of group B streptococcal carboyhdrate antigen	1823,Lipoprotein involved in the synthesis of group B streptococcal carboyhdrate antigen	1610,Lipoprotein involved in the synthesis of group B streptococcal carboyhdrate antigen	1552,Lipoprotein involved in the synthesis of group B streptococcal carboyhdrate antigen	1562,Lipoprotein involved in the synthesis of group B streptococcal carboyhdrate antigen	364,Lipoprotein involved in the synthesis of group B streptococcal carboyhdrate antigen	1525,Lipoprotein involved in the synthesis of group B streptococcal carboyhdrate antigen	521,Lipoprotein involved in the synthesis of group B streptococcal carboyhdrate antigen	687,Lipoprotein involved in the synthesis of group B streptococcal carboyhdrate antigen	300,Lipoprotein involved in the synthesis of group B streptococcal carboyhdrate antigen	381,Lipoprotein involved in the synthesis of group B streptococcal carboyhdrate antigen	764,Lipoprotein involved in the synthesis of group B streptococcal carboyhdrate antigen	732,Lipoprotein involved in the synthesis of group B streptococcal carboyhdrate antigen	334,Lipoprotein involved in the synthesis of group B streptococcal carboyhdrate antigen
153,Lipopolysaccharide cholinephosphotransferase LicD1	891,Lipopolysaccharide cholinephosphotransferase LicD1	259,Lipopolysaccharide cholinephosphotransferase LicD1	435,Lipopolysaccharide cholinephosphotransferase LicD1	455,Lipopolysaccharide cholinephosphotransferase LicD1	1647,Lipopolysaccharide cholinephosphotransferase LicD1	276,Lipopolysaccharide cholinephosphotransferase LicD1	1824,Lipopolysaccharide cholinephosphotransferase LicD1	1609,Lipopolysaccharide cholinephosphotransferase LicD1	1551,Lipopolysaccharide cholinephosphotransferase LicD1	1561,Lipopolysaccharide cholinephosphotransferase LicD1	363,Lipopolysaccharide cholinephosphotransferase LicD1	1526,Lipopolysaccharide cholinephosphotransferase LicD1	520,Lipopolysaccharide cholinephosphotransferase LicD1	688,Lipopolysaccharide cholinephosphotransferase LicD1	301,Lipopolysaccharide cholinephosphotransferase LicD1	382,Lipopolysaccharide cholinephosphotransferase LicD1	763,Lipopolysaccharide cholinephosphotransferase LicD1	733,Lipopolysaccharide cholinephosphotransferase LicD1	335,Lipopolysaccharide cholinephosphotransferase LicD1
154,2-C-methyl-D-erythritol 4-phosphate cytidylyltransferase	892,2-C-methyl-D-erythritol 4-phosphate cytidylyltransferase	258,2-C-methyl-D-erythritol 4-phosphate cytidylyltransferase	436,2-C-methyl-D-erythritol 4-phosphate cytidylyltransferase	454,2-C-methyl-D-erythritol 4-phosphate cytidylyltransferase	1646,2-C-methyl-D-erythritol 4-phosphate cytidylyltransferase	277,2-C-methyl-D-erythritol 4-phosphate cytidylyltransferase	1825,2-C-methyl-D-erythritol 4-phosphate cytidylyltransferase	1608,2-C-methyl-D-erythritol 4-phosphate cytidylyltransferase	1550,2-C-methyl-D-erythritol 4-phosphate cytidylyltransferase	1560,2-C-methyl-D-erythritol 4-phosphate cytidylyltransferase	362,2-C-methyl-D-erythritol 4-phosphate cytidylyltransferase	1527,2-C-methyl-D-erythritol 4-phosphate cytidylyltransferase	519,2-C-methyl-D-erythritol 4-phosphate cytidylyltransferase	689,2-C-methyl-D-erythritol 4-phosphate cytidylyltransferase	302,2-C-methyl-D-erythritol 4-phosphate cytidylyltransferase	383,2-C-methyl-D-erythritol 4-phosphate cytidylyltransferase	762,2-C-methyl-D-erythritol 4-phosphate cytidylyltransferase	734,2-C-methyl-D-erythritol 4-phosphate cytidylyltransferase	336,2-C-methyl-D-erythritol 4-phosphate cytidylyltransferase
155,dTDP-glucose 4,6-dehydratase	893,dTDP-glucose 4,6-dehydratase	257,dTDP-glucose 4,6-dehydratase	437,dTDP-glucose 4,6-dehydratase	453,dTDP-glucose 4,6-dehydratase	1645,dTDP-glucose 4,6-dehydratase	278,dTDP-glucose 4,6-dehydratase	1826,dTDP-glucose 4,6-dehydratase	1607,dTDP-glucose 4,6-dehydratase	1549,dTDP-glucose 4,6-dehydratase	1559,dTDP-glucose 4,6-dehydratase	361,dTDP-glucose 4,6-dehydratase	1528,dTDP-glucose 4,6-dehydratase	518,dTDP-glucose 4,6-dehydratase	690,dTDP-glucose 4,6-dehydratase	303,dTDP-glucose 4,6-dehydratase	384,dTDP-glucose 4,6-dehydratase	761,dTDP-glucose 4,6-dehydratase	735,dTDP-glucose 4,6-dehydratase	337,dTDP-glucose 4,6-dehydratase
156,Glycosyl transferase, group 2 family protein	894,Glycosyl transferase, group 2 family protein	256,Glycosyl transferase, group 2 family protein	438,Glycosyl transferase, group 2 family protein	452,Glycosyl transferase, group 2 family protein	1644,Glycosyl transferase, group 2 family protein	279,Glycosyl transferase, group 2 family protein	1827,Glycosyl transferase, group 2 family protein	1606,Glycosyl transferase, group 2 family protein	1548,Glycosyl transferase, group 2 family protein	1558,Glycosyl transferase, group 2 family protein	360,Glycosyl transferase, group 2 family protein	1529,Glycosyl transferase, group 2 family protein	517,Glycosyl transferase, group 2 family protein	691,Glycosyl transferase, group 2 family protein	304,Glycosyl transferase, group 2 family protein	385,Glycosyl transferase, group 2 family protein	760,Glycosyl transferase, group 2 family protein	736,Glycosyl transferase, group 2 family protein	338,Glycosyl transferase, group 2 family protein
157,membrane protein, putative	895,membrane protein, putative	255,membrane protein, putative	439,membrane protein, putative	451,membrane protein, putative	1643,membrane protein, putative	280,membrane protein, putative	1828,membrane protein, putative	1605,membrane protein, putative	1547,membrane protein, putative	1557,membrane protein, putative	359,membrane protein, putative	1530,membrane protein, putative	516,membrane protein, putative	692,membrane protein, putative	305,membrane protein, putative	386,membrane protein, putative	759,membrane protein, putative	737,membrane protein, putative	339,membrane protein, putative
158,Membrane protein involved in the export of O-antigen, teichoic acid lipoteichoic acids	896,Membrane protein involved in the export of O-antigen, teichoic acid lipoteichoic acids	254,Membrane protein involved in the export of O-antigen, teichoic acid lipoteichoic acids	440,Membrane protein involved in the export of O-antigen, teichoic acid lipoteichoic acids	450,Membrane protein involved in the export of O-antigen, teichoic acid lipoteichoic acids	1642,Membrane protein involved in the export of O-antigen, teichoic acid lipoteichoic acids	281,Membrane protein involved in the export of O-antigen, teichoic acid lipoteichoic acids	1829,Membrane protein involved in the export of O-antigen, teichoic acid lipoteichoic acids	1604,Membrane protein involved in the export of O-antigen, teichoic acid lipoteichoic acids	1546,Membrane protein involved in the export of O-antigen, teichoic acid lipoteichoic acids	1556,Membrane protein involved in the export of O-antigen, teichoic acid lipoteichoic acids	358,Membrane protein involved in the export of O-antigen, teichoic acid lipoteichoic acids	1531,Membrane protein involved in the export of O-antigen, teichoic acid lipoteichoic acids	515,Membrane protein involved in the export of O-antigen, teichoic acid lipoteichoic acids	693,Membrane protein involved in the export of O-antigen, teichoic acid lipoteichoic acids	306,Membrane protein involved in the export of O-antigen, teichoic acid lipoteichoic acids	387,Membrane protein involved in the export of O-antigen, teichoic acid lipoteichoic acids	758,Membrane protein involved in the export of O-antigen, teichoic acid lipoteichoic acids	738,Membrane protein involved in the export of O-antigen, teichoic acid lipoteichoic acids	340,Membrane protein involved in the export of O-antigen, teichoic acid lipoteichoic acids
159,dTDP-rhamnosyl transferase RfbF	897,dTDP-rhamnosyl transferase RfbF	253,dTDP-rhamnosyl transferase RfbF	441,dTDP-rhamnosyl transferase RfbF	449,dTDP-rhamnosyl transferase RfbF	1641,dTDP-rhamnosyl transferase RfbF	282,dTDP-rhamnosyl transferase RfbF	1830,dTDP-rhamnosyl transferase RfbF	1603,dTDP-rhamnosyl transferase RfbF	1545,dTDP-rhamnosyl transferase RfbF	1555,dTDP-rhamnosyl transferase RfbF	357,dTDP-rhamnosyl transferase RfbF	1532,dTDP-rhamnosyl transferase RfbF	514,dTDP-rhamnosyl transferase RfbF	694,dTDP-rhamnosyl transferase RfbF	307,dTDP-rhamnosyl transferase RfbF	388,dTDP-rhamnosyl transferase RfbF	757,dTDP-rhamnosyl transferase RfbF	739,dTDP-rhamnosyl transferase RfbF	341,dTDP-rhamnosyl transferase RfbF
160,glycosyl transferase, group 1 family protein	- , -	252,glycosyl transferase, group 1 family protein	442,glycosyl transferase, group 1 family protein	448,glycosyl transferase, group 1 family protein	1640,glycosyl transferase, group 1 family protein	283,glycosyl transferase, group 1 family protein	1831,glycosyl transferase, group 1 family protein	1602,glycosyl transferase, group 1 family protein	1544,glycosyl transferase, group 1 family protein	1554,glycosyl transferase, group 1 family protein	356,glycosyl transferase, group 1 family protein	1533,glycosyl transferase, group 1 family protein	513,glycosyl transferase, group 1 family protein	- , -	308,glycosyl transferase, group 1 family protein	389,glycosyl transferase, group 1 family protein	756,glycosyl transferase, group 1 family protein	740,glycosyl transferase, group 1 family protein	342,glycosyl transferase, group 1 family protein
161,Tripeptide aminopeptidase	336,Tripeptide aminopeptidase	251,Tripeptide aminopeptidase	443,Tripeptide aminopeptidase	447,Tripeptide aminopeptidase	1503,Tripeptide aminopeptidase	284,Tripeptide aminopeptidase	1832,Tripeptide aminopeptidase	1601,Tripeptide aminopeptidase	1543,Tripeptide aminopeptidase	1553,Tripeptide aminopeptidase	355,Tripeptide aminopeptidase	1534,Tripeptide aminopeptidase	512,Tripeptide aminopeptidase	100,Tripeptide aminopeptidase	309,Tripeptide aminopeptidase	390,Tripeptide aminopeptidase	755,Tripeptide aminopeptidase	741,Tripeptide aminopeptidase	343,Tripeptide aminopeptidase
162,Conjugation pore forming protein EbsA	335,Conjugation pore forming protein EbsA	250,Conjugation pore forming protein EbsA	444,Conjugation pore forming protein EbsA	446,Conjugation pore forming protein EbsA	1502,Conjugation pore forming protein EbsA	285,Conjugation pore forming protein EbsA	1833,Conjugation pore forming protein EbsA	1600,Conjugation pore forming protein EbsA	1542,Conjugation pore forming protein EbsA	1552,Conjugation pore forming protein EbsA	354,Conjugation pore forming protein EbsA	1535,Conjugation pore forming protein EbsA	511,Conjugation pore forming protein EbsA	101,Conjugation pore forming protein EbsA	310,Conjugation pore forming protein EbsA	391,Conjugation pore forming protein EbsA	754,Conjugation pore forming protein EbsA	742,Conjugation pore forming protein EbsA	344,Conjugation pore forming protein EbsA
163,Ferredoxin	334,Ferredoxin	249,Ferredoxin	445,Ferredoxin	445,Ferredoxin	1501,Ferredoxin	286,Ferredoxin	1834,Ferredoxin	1599,Ferredoxin	1541,Ferredoxin	1551,Ferredoxin	353,Ferredoxin	1536,Ferredoxin	510,Ferredoxin	102,Ferredoxin	311,Ferredoxin	392,Ferredoxin	753,Ferredoxin	743,Ferredoxin	345,Ferredoxin
164,FIG01114555: hypothetical protein	333,FIG01114555: hypothetical protein	248,FIG01114555: hypothetical protein	446,FIG01114555: hypothetical protein	444,FIG01114555: hypothetical protein	1500,FIG01114555: hypothetical protein	287,FIG01114555: hypothetical protein	1835,FIG01114555: hypothetical protein	1598,FIG01114555: hypothetical protein	1540,FIG01114555: hypothetical protein	1550,FIG01114555: hypothetical protein	352,FIG01114555: hypothetical protein	1537,FIG01114555: hypothetical protein	509,FIG01114555: hypothetical protein	103,FIG01114555: hypothetical protein	312,FIG01114555: hypothetical protein	393,FIG01114555: hypothetical protein	752,FIG01114555: hypothetical protein	744,FIG01114555: hypothetical protein	346,FIG01114555: hypothetical protein
165,Cytidylate kinase	332,Cytidylate kinase	247,Cytidylate kinase	447,Cytidylate kinase	443,Cytidylate kinase	1499,Cytidylate kinase	288,Cytidylate kinase	1836,Cytidylate kinase	1597,Cytidylate kinase	1539,Cytidylate kinase	1549,Cytidylate kinase	351,Cytidylate kinase	1538,Cytidylate kinase	508,Cytidylate kinase	104,Cytidylate kinase	313,Cytidylate kinase	394,Cytidylate kinase	751,Cytidylate kinase	745,Cytidylate kinase	347,Cytidylate kinase
166,Translation initiation factor 3	331,Translation initiation factor 3	246,Translation initiation factor 3	448,Translation initiation factor 3	442,Translation initiation factor 3	1498,Translation initiation factor 3	289,Translation initiation factor 3	1837,Translation initiation factor 3	1596,Translation initiation factor 3	1538,Translation initiation factor 3	1548,Translation initiation factor 3	350,Translation initiation factor 3	1539,Translation initiation factor 3	507,Translation initiation factor 3	105,Translation initiation factor 3	314,Translation initiation factor 3	395,Translation initiation factor 3	750,Translation initiation factor 3	746,Translation initiation factor 3	348,Translation initiation factor 3
167,LSU ribosomal protein L35p	330,LSU ribosomal protein L35p	245,LSU ribosomal protein L35p	449,LSU ribosomal protein L35p	441,LSU ribosomal protein L35p	1497,LSU ribosomal protein L35p	290,LSU ribosomal protein L35p	1838,LSU ribosomal protein L35p	1595,LSU ribosomal protein L35p	1537,LSU ribosomal protein L35p	1547,LSU ribosomal protein L35p	349,LSU ribosomal protein L35p	1540,LSU ribosomal protein L35p	506,LSU ribosomal protein L35p	106,LSU ribosomal protein L35p	315,LSU ribosomal protein L35p	396,LSU ribosomal protein L35p	749,LSU ribosomal protein L35p	747,LSU ribosomal protein L35p	349,LSU ribosomal protein L35p
168,LSU ribosomal protein L20p	329,LSU ribosomal protein L20p	244,LSU ribosomal protein L20p	450,LSU ribosomal protein L20p	440,LSU ribosomal protein L20p	1496,LSU ribosomal protein L20p	291,LSU ribosomal protein L20p	1839,LSU ribosomal protein L20p	1594,LSU ribosomal protein L20p	1536,LSU ribosomal protein L20p	1546,LSU ribosomal protein L20p	348,LSU ribosomal protein L20p	1541,LSU ribosomal protein L20p	505,LSU ribosomal protein L20p	107,LSU ribosomal protein L20p	316,LSU ribosomal protein L20p	397,LSU ribosomal protein L20p	748,LSU ribosomal protein L20p	748,LSU ribosomal protein L20p	350,LSU ribosomal protein L20p
169,Ribonuclease E	328,Ribonuclease E	- , -	451,hypothetical protein	439,hypothetical protein	1013,Ribonucleases G and E	292,Ribonucleases G and E	1840,Ribonucleases G and E	1593,Ribonucleases G and E	1535,Ribonucleases G and E	1545,Ribonucleases G and E	347,hypothetical protein	1542,Ribonucleases G and E	504,similar to hedgehog protein	108,Ribonuclease E	317,similar to hedgehog protein	398,Ribonuclease E	747,hypothetical protein	749,hypothetical protein	351,Ribonucleases G and E
170,hypothetical protein	327,hypothetical protein	- , -	452,hypothetical protein	438,hypothetical protein	1015,hypothetical protein	293,hypothetical protein	1841,hypothetical protein	1592,hypothetical protein	1534,hypothetical protein	1544,hypothetical protein	346,hypothetical protein	1543,hypothetical protein	503,hypothetical protein	109,hypothetical protein	318,hypothetical protein	399,hypothetical protein	746,hypothetical protein	750,hypothetical protein	352,hypothetical protein
171,hypothetical protein	326,hypothetical protein	1076,hypothetical protein	- , -	- , -	- , -	- , -	1842,hypothetical protein	1591,hypothetical protein	1533,hypothetical protein	1543,hypothetical protein	- , -	1544,hypothetical protein	- , -	110,hypothetical protein	- , -	400,hypothetical protein	- , -	- , -	- , -
172,hypothetical protein	325,hypothetical protein	1077,hypothetical protein	455,hypothetical protein	435,hypothetical protein	1017,hypothetical protein	294,hypothetical protein	1843,hypothetical protein	1590,hypothetical protein	1532,hypothetical protein	1542,hypothetical protein	343,hypothetical protein	1545,hypothetical protein	501,hypothetical protein	111,hypothetical protein	320,hypothetical protein	401,hypothetical protein	743,hypothetical protein	753,hypothetical protein	353,hypothetical protein
173,hypothetical protein	324,hypothetical protein	1079,hypothetical protein	456,hypothetical protein	434,hypothetical protein	1018,hypothetical protein	- , -	1844,hypothetical protein	1589,hypothetical protein	1531,hypothetical protein	1541,hypothetical protein	- , -	1546,hypothetical protein	500,hypothetical protein	112,hypothetical protein	321,hypothetical protein	402,hypothetical protein	- , -	- , -	354,hypothetical protein
174,Lipoteichoic acid synthase LtaS Type IIc	323,Lipoteichoic acid synthase LtaS Type IIc	736,Lipoteichoic acid synthase LtaS Type IIc	457,Lipoteichoic acid synthase LtaS Type IIc	433,Lipoteichoic acid synthase LtaS Type IIc	1019,Lipoteichoic acid synthase LtaS Type IIc	295,Lipoteichoic acid synthase LtaS Type IIc	1845,Lipoteichoic acid synthase LtaS Type IIc	1588,Lipoteichoic acid synthase LtaS Type IIc	1530,Lipoteichoic acid synthase LtaS Type IIc	1540,Lipoteichoic acid synthase LtaS Type IIc	341,Lipoteichoic acid synthase LtaS Type IIc	1547,Lipoteichoic acid synthase LtaS Type IIc	499,Lipoteichoic acid synthase LtaS Type IIc	113,Lipoteichoic acid synthase LtaS Type IIc	322,Lipoteichoic acid synthase LtaS Type IIc	403,Lipoteichoic acid synthase LtaS Type IIc	742,Lipoteichoic acid synthase LtaS Type IIc	754,Lipoteichoic acid synthase LtaS Type IIc	355,Lipoteichoic acid synthase LtaS Type IIc
175,LSU m5C1962 methyltransferase RlmI	322,LSU m5C1962 methyltransferase RlmI	735,LSU m5C1962 methyltransferase RlmI	458,LSU m5C1962 methyltransferase RlmI	432,LSU m5C1962 methyltransferase RlmI	1020,LSU m5C1962 methyltransferase RlmI	296,LSU m5C1962 methyltransferase RlmI	1846,LSU m5C1962 methyltransferase RlmI	1587,LSU m5C1962 methyltransferase RlmI	1529,LSU m5C1962 methyltransferase RlmI	1539,LSU m5C1962 methyltransferase RlmI	340,LSU m5C1962 methyltransferase RlmI	1548,LSU m5C1962 methyltransferase RlmI	498,LSU m5C1962 methyltransferase RlmI	114,LSU m5C1962 methyltransferase RlmI	323,LSU m5C1962 methyltransferase RlmI	404,LSU m5C1962 methyltransferase RlmI	741,LSU m5C1962 methyltransferase RlmI	755,LSU m5C1962 methyltransferase RlmI	356,LSU m5C1962 methyltransferase RlmI
176,3-dehydroquinate dehydratase I	321,3-dehydroquinate dehydratase I	734,3-dehydroquinate dehydratase I	459,3-dehydroquinate dehydratase I	431,3-dehydroquinate dehydratase I	1021,3-dehydroquinate dehydratase I	297,3-dehydroquinate dehydratase I	1847,3-dehydroquinate dehydratase I	1586,3-dehydroquinate dehydratase I	1528,3-dehydroquinate dehydratase I	1538,3-dehydroquinate dehydratase I	339,3-dehydroquinate dehydratase I	1549,3-dehydroquinate dehydratase I	497,3-dehydroquinate dehydratase I	115,3-dehydroquinate dehydratase I	324,3-dehydroquinate dehydratase I	405,3-dehydroquinate dehydratase I	740,3-dehydroquinate dehydratase I	756,3-dehydroquinate dehydratase I	357,3-dehydroquinate dehydratase I
177,Chorismate synthase	320,Chorismate synthase	732,Chorismate synthase	460,Chorismate synthase	430,Chorismate synthase	1022,Chorismate synthase	298,Chorismate synthase	1848,Chorismate synthase	1585,Chorismate synthase	1527,Chorismate synthase	1537,Chorismate synthase	338,Chorismate synthase	1550,Chorismate synthase	496,Chorismate synthase	116,Chorismate synthase	326,Chorismate synthase	406,Chorismate synthase	739,Chorismate synthase	757,Chorismate synthase	358,Chorismate synthase
178,FIG01116936: hypothetical protein	319,FIG01116936: hypothetical protein	731,FIG01116936: hypothetical protein	461,FIG01116936: hypothetical protein	429,FIG01116936: hypothetical protein	1023,FIG01116936: hypothetical protein	299,FIG01116936: hypothetical protein	1849,FIG01116936: hypothetical protein	1584,FIG01116936: hypothetical protein	1526,FIG01116936: hypothetical protein	1536,FIG01116936: hypothetical protein	337,FIG01116936: hypothetical protein	1551,FIG01116936: hypothetical protein	495,FIG01116936: hypothetical protein	117,FIG01116936: hypothetical protein	327,FIG01116936: hypothetical protein	407,FIG01116936: hypothetical protein	738,FIG01116936: hypothetical protein	758,FIG01116936: hypothetical protein	359,FIG01116936: hypothetical protein
179,Glutathione reductase	318,Glutathione reductase	730,Glutathione reductase	462,Glutathione reductase	428,Glutathione reductase	1024,Glutathione reductase	300,Glutathione reductase	1850,Glutathione reductase	1583,Glutathione reductase	1525,Glutathione reductase	1535,Glutathione reductase	336,Glutathione reductase	1552,Glutathione reductase	494,Glutathione reductase	118,Glutathione reductase	328,Glutathione reductase	408,Glutathione reductase	737,Glutathione reductase	759,Glutathione reductase	360,Glutathione reductase
180,Histone acetyltransferase Gcn5	317,Histone acetyltransferase Gcn5	729,Histone acetyltransferase Gcn5	463,Histone acetyltransferase Gcn5	427,Histone acetyltransferase Gcn5	1025,Histone acetyltransferase Gcn5	301,Histone acetyltransferase Gcn5	1851,Histone acetyltransferase Gcn5	1582,Histone acetyltransferase Gcn5	1524,Histone acetyltransferase Gcn5	1534,Histone acetyltransferase Gcn5	335,Histone acetyltransferase Gcn5	1553,Histone acetyltransferase Gcn5	493,Histone acetyltransferase Gcn5	119,Histone acetyltransferase Gcn5	329,Histone acetyltransferase Gcn5	409,Histone acetyltransferase Gcn5	736,Histone acetyltransferase Gcn5	760,Histone acetyltransferase Gcn5	361,Histone acetyltransferase Gcn5
181,Cysteine desulfurase	316,Cysteine desulfurase	728,Cysteine desulfurase	464,Cysteine desulfurase	426,Cysteine desulfurase	1026,Cysteine desulfurase	302,Cysteine desulfurase	1852,Cysteine desulfurase	1581,Cysteine desulfurase	1523,Cysteine desulfurase	1533,Cysteine desulfurase	334,Cysteine desulfurase	1554,Cysteine desulfurase	491,Cysteine desulfurase	120,Cysteine desulfurase	331,Cysteine desulfurase	410,Cysteine desulfurase	735,Cysteine desulfurase	761,Cysteine desulfurase	55,Cysteine desulfurase
182,tRNA S(4)U 4-thiouridine synthase (former ThiI)	315,tRNA S(4)U 4-thiouridine synthase (former ThiI)	727,Thiamine biosynthesis protein thiI	465,Thiamine biosynthesis protein thiI	425,Thiamine biosynthesis protein thiI	1027,Thiamine biosynthesis protein thiI	303,Thiamine biosynthesis protein thiI	1853,Thiamine biosynthesis protein thiI	1580,Thiamine biosynthesis protein thiI	1522,Thiamine biosynthesis protein thiI	1532,Thiamine biosynthesis protein thiI	333,Thiamine biosynthesis protein thiI	1555,Thiamine biosynthesis protein thiI	490,Thiamine biosynthesis protein thiI	121,tRNA S(4)U 4-thiouridine synthase (former ThiI)	332,Thiamine biosynthesis protein thiI	411,tRNA S(4)U 4-thiouridine synthase (former ThiI)	734,Thiamine biosynthesis protein thiI	762,Thiamine biosynthesis protein thiI	54,Thiamine biosynthesis protein thiI
183,Capsule biosynthesis protein capA	314,Capsule biosynthesis protein capA	726,Capsule biosynthesis protein capA	466,Capsule biosynthesis protein capA	424,Capsule biosynthesis protein capA	1028,Capsule biosynthesis protein capA	304,Capsule biosynthesis protein capA	1854,Capsule biosynthesis protein capA	1579,Capsule biosynthesis protein capA	1521,Capsule biosynthesis protein capA	1531,Capsule biosynthesis protein capA	332,Capsule biosynthesis protein capA	1556,Capsule biosynthesis protein capA	489,Capsule biosynthesis protein capA	122,Capsule biosynthesis protein capA	333,Capsule biosynthesis protein capA	412,Capsule biosynthesis protein capA	733,Capsule biosynthesis protein capA	763,Capsule biosynthesis protein capA	53,Capsule biosynthesis protein capA
184,hypothetical protein	313,hypothetical protein	725,hypothetical protein	467,hypothetical protein	423,hypothetical protein	- , -	- , -	1855,hypothetical protein	1578,hypothetical protein	1520,hypothetical protein	1530,hypothetical protein	331,hypothetical protein	1557,hypothetical protein	- , -	123,hypothetical protein	- , -	413,hypothetical protein	732,Transposase (maltose area)	764,hypothetical protein	- , -
185,LSU ribosomal protein L21p	312,LSU ribosomal protein L21p	724,LSU ribosomal protein L21p	708,LSU ribosomal protein L21p	1930,LSU ribosomal protein L21p	1526,LSU ribosomal protein L21p	892,LSU ribosomal protein L21p	1856,LSU ribosomal protein L21p	1577,LSU ribosomal protein L21p	1519,LSU ribosomal protein L21p	1529,LSU ribosomal protein L21p	1143,LSU ribosomal protein L21p	1558,LSU ribosomal protein L21p	391,LSU ribosomal protein L21p	124,LSU ribosomal protein L21p	1682,LSU ribosomal protein L21p	414,LSU ribosomal protein L21p	1514,LSU ribosomal protein L21p	1235,LSU ribosomal protein L21p	52,LSU ribosomal protein L21p
186,FIG139598: Potential ribosomal protein	311,FIG139598: Potential ribosomal protein	723,FIG139598: Potential ribosomal protein	707,FIG139598: Potential ribosomal protein	1929,FIG139598: Potential ribosomal protein	1525,FIG139598: Potential ribosomal protein	891,FIG139598: Potential ribosomal protein	1857,FIG139598: Potential ribosomal protein	1576,FIG139598: Potential ribosomal protein	1518,FIG139598: Potential ribosomal protein	1528,FIG139598: Potential ribosomal protein	1144,FIG139598: Potential ribosomal protein	1559,FIG139598: Potential ribosomal protein	390,FIG139598: Potential ribosomal protein	125,FIG139598: Potential ribosomal protein	1681,FIG139598: Potential ribosomal protein	415,FIG139598: Potential ribosomal protein	1513,FIG139598: Potential ribosomal protein	1236,FIG139598: Potential ribosomal protein	51,FIG139598: Potential ribosomal protein
187,LSU ribosomal protein L27p	310,LSU ribosomal protein L27p	722,LSU ribosomal protein L27p	706,LSU ribosomal protein L27p	1928,LSU ribosomal protein L27p	1524,LSU ribosomal protein L27p	890,LSU ribosomal protein L27p	1858,LSU ribosomal protein L27p	1575,LSU ribosomal protein L27p	1517,LSU ribosomal protein L27p	1527,LSU ribosomal protein L27p	1145,LSU ribosomal protein L27p	1560,LSU ribosomal protein L27p	389,LSU ribosomal protein L27p	126,LSU ribosomal protein L27p	1680,LSU ribosomal protein L27p	416,LSU ribosomal protein L27p	1512,LSU ribosomal protein L27p	1237,LSU ribosomal protein L27p	50,LSU ribosomal protein L27p
188,Cysteine and methionine metabolism regulator CmbR, LysR family	309,Cysteine and methionine metabolism regulator CmbR, LysR family	721,Cysteine and methionine metabolism regulator CmbR, LysR family	705,Cysteine and methionine metabolism regulator CmbR, LysR family	1927,Cysteine and methionine metabolism regulator CmbR, LysR family	1523,Cysteine and methionine metabolism regulator CmbR, LysR family	889,Cysteine and methionine metabolism regulator CmbR, LysR family	1859,Cysteine and methionine metabolism regulator CmbR, LysR family	1574,Cysteine and methionine metabolism regulator CmbR, LysR family	1516,Cysteine and methionine metabolism regulator CmbR, LysR family	1526,Cysteine and methionine metabolism regulator CmbR, LysR family	1146,Cysteine and methionine metabolism regulator CmbR, LysR family	1561,Cysteine and methionine metabolism regulator CmbR, LysR family	388,Cysteine and methionine metabolism regulator CmbR, LysR family	127,Cysteine and methionine metabolism regulator CmbR, LysR family	1679,Cysteine and methionine metabolism regulator CmbR, LysR family	417,Cysteine and methionine metabolism regulator CmbR, LysR family	1511,Cysteine and methionine metabolism regulator CmbR, LysR family	1238,Cysteine and methionine metabolism regulator CmbR, LysR family	49,Cysteine and methionine metabolism regulator CmbR, LysR family
189,Lipoprotein signal peptidase	308,Lipoprotein signal peptidase	720,Lipoprotein signal peptidase	704,Lipoprotein signal peptidase	1926,Lipoprotein signal peptidase	1522,Lipoprotein signal peptidase	888,Lipoprotein signal peptidase	1860,Lipoprotein signal peptidase	1573,Lipoprotein signal peptidase	1515,Lipoprotein signal peptidase	1525,Lipoprotein signal peptidase	1147,Lipoprotein signal peptidase	1562,Lipoprotein signal peptidase	387,Lipoprotein signal peptidase	128,Lipoprotein signal peptidase	1678,Lipoprotein signal peptidase	418,Lipoprotein signal peptidase	1510,Lipoprotein signal peptidase	1239,Lipoprotein signal peptidase	48,Lipoprotein signal peptidase
190,Ribosomal large subunit pseudouridine synthase D	307,Ribosomal large subunit pseudouridine synthase D	719,Ribosomal large subunit pseudouridine synthase D	703,Ribosomal large subunit pseudouridine synthase D	1925,Ribosomal large subunit pseudouridine synthase D	1521,Ribosomal large subunit pseudouridine synthase D	887,Ribosomal large subunit pseudouridine synthase D	1861,Ribosomal large subunit pseudouridine synthase D	1572,Ribosomal large subunit pseudouridine synthase D	1514,Ribosomal large subunit pseudouridine synthase D	1524,Ribosomal large subunit pseudouridine synthase D	1148,Ribosomal large subunit pseudouridine synthase D	1563,Ribosomal large subunit pseudouridine synthase D	386,Ribosomal large subunit pseudouridine synthase D	129,Ribosomal large subunit pseudouridine synthase D	1677,Ribosomal large subunit pseudouridine synthase D	419,Ribosomal large subunit pseudouridine synthase D	1509,Ribosomal large subunit pseudouridine synthase D	1240,Ribosomal large subunit pseudouridine synthase D	47,Ribosomal large subunit pseudouridine synthase D
191,Uracil phosphoribosyltransferase / Pyrimidine operon regulatory protein PyrR	306,Uracil phosphoribosyltransferase / Pyrimidine operon regulatory protein PyrR	718,Uracil phosphoribosyltransferase / Pyrimidine operon regulatory protein PyrR	701,Uracil phosphoribosyltransferase / Pyrimidine operon regulatory protein PyrR	1923,Uracil phosphoribosyltransferase / Pyrimidine operon regulatory protein PyrR	329,Uracil phosphoribosyltransferase / Pyrimidine operon regulatory protein PyrR	886,Uracil phosphoribosyltransferase / Pyrimidine operon regulatory protein PyrR	1862,Uracil phosphoribosyltransferase / Pyrimidine operon regulatory protein PyrR	1571,Uracil phosphoribosyltransferase / Pyrimidine operon regulatory protein PyrR	1513,Uracil phosphoribosyltransferase / Pyrimidine operon regulatory protein PyrR	1523,Uracil phosphoribosyltransferase / Pyrimidine operon regulatory protein PyrR	1150,Uracil phosphoribosyltransferase / Pyrimidine operon regulatory protein PyrR	1564,Uracil phosphoribosyltransferase / Pyrimidine operon regulatory protein PyrR	385,Uracil phosphoribosyltransferase / Pyrimidine operon regulatory protein PyrR	130,Uracil phosphoribosyltransferase / Pyrimidine operon regulatory protein PyrR	1676,Uracil phosphoribosyltransferase / Pyrimidine operon regulatory protein PyrR	420,Uracil phosphoribosyltransferase / Pyrimidine operon regulatory protein PyrR	1507,Uracil phosphoribosyltransferase / Pyrimidine operon regulatory protein PyrR	1242,Uracil phosphoribosyltransferase / Pyrimidine operon regulatory protein PyrR	46,Uracil phosphoribosyltransferase / Pyrimidine operon regulatory protein PyrR
192,Uracil permease	305,Uracil permease	717,Uracil permease	700,Uracil permease	1922,Uracil permease	330,Uracil permease	885,Uracil permease	1863,Uracil permease	1570,Uracil permease	1512,Uracil permease	1522,Uracil permease	1151,Uracil permease	1565,Uracil permease	384,Uracil permease	131,Uracil permease	1675,Uracil permease	421,Uracil permease	1506,Uracil permease	1243,Uracil permease	45,Uracil permease
193,Aspartate carbamoyltransferase	304,Aspartate carbamoyltransferase	716,Aspartate carbamoyltransferase	699,Aspartate carbamoyltransferase	1921,Aspartate carbamoyltransferase	331,Aspartate carbamoyltransferase	884,Aspartate carbamoyltransferase	1864,Aspartate carbamoyltransferase	1569,Aspartate carbamoyltransferase	1511,Aspartate carbamoyltransferase	1521,Aspartate carbamoyltransferase	1152,Aspartate carbamoyltransferase	1566,Aspartate carbamoyltransferase	383,Aspartate carbamoyltransferase	132,Aspartate carbamoyltransferase	1674,Aspartate carbamoyltransferase	422,Aspartate carbamoyltransferase	1505,Aspartate carbamoyltransferase	1244,Aspartate carbamoyltransferase	44,Aspartate carbamoyltransferase
194,periplasmic component of efflux system	303,periplasmic component of efflux system	715,periplasmic component of efflux system	698,periplasmic component of efflux system	1920,periplasmic component of efflux system	332,periplasmic component of efflux system	883,periplasmic component of efflux system	1865,periplasmic component of efflux system	1568,periplasmic component of efflux system	1510,periplasmic component of efflux system	1520,periplasmic component of efflux system	1153,periplasmic component of efflux system	1567,periplasmic component of efflux system	382,periplasmic component of efflux system	133,periplasmic component of efflux system	1673,periplasmic component of efflux system	423,periplasmic component of efflux system	1504,periplasmic component of efflux system	1245,periplasmic component of efflux system	43,periplasmic component of efflux system
195,ABC transporter ATP-binding protein	302,ABC transporter ATP-binding protein	714,ABC transporter ATP-binding protein	697,ABC transporter ATP-binding protein	1919,ABC transporter ATP-binding protein	333,ABC transporter ATP-binding protein	882,ABC transporter ATP-binding protein	1866,ABC transporter ATP-binding protein	1567,ABC transporter ATP-binding protein	1509,ABC transporter ATP-binding protein	1519,ABC transporter ATP-binding protein	1154,ABC transporter ATP-binding protein	1568,ABC transporter ATP-binding protein	381,ABC transporter ATP-binding protein	134,ABC transporter ATP-binding protein	1672,ABC transporter ATP-binding protein	424,ABC transporter ATP-binding protein	1503,ABC transporter ATP-binding protein	1246,ABC transporter ATP-binding protein	42,ABC transporter ATP-binding protein
196,ABC transporter permease protein	301,ABC transporter permease protein	713,ABC transporter permease protein	696,ABC transporter permease protein	1918,ABC transporter permease protein	334,ABC transporter permease protein	881,ABC transporter permease protein	1867,ABC transporter permease protein	1566,ABC transporter permease protein	1508,ABC transporter permease protein	1518,ABC transporter permease protein	1155,ABC transporter permease protein	1569,ABC transporter permease protein	380,ABC transporter permease protein	135,ABC transporter permease protein	1671,ABC transporter permease protein	425,ABC transporter permease protein	1502,ABC transporter permease protein	1247,ABC transporter permease protein	41,ABC transporter permease protein
197,Immunoreactive protein Se23.5 (Fragment)	300,Immunoreactive protein Se23.5 (Fragment)	712,Immunoreactive protein Se23.5 (Fragment)	695,Immunoreactive protein Se23.5 (Fragment)	1917,Immunoreactive protein Se23.5 (Fragment)	335,Immunoreactive protein Se23.5 (Fragment)	880,Immunoreactive protein Se23.5 (Fragment)	1868,Immunoreactive protein Se23.5 (Fragment)	1565,Immunoreactive protein Se23.5 (Fragment)	1507,Immunoreactive protein Se23.5 (Fragment)	1517,Immunoreactive protein Se23.5 (Fragment)	1156,Immunoreactive protein Se23.5 (Fragment)	1570,Immunoreactive protein Se23.5 (Fragment)	379,Immunoreactive protein Se23.5 (Fragment)	136,Immunoreactive protein Se23.5 (Fragment)	1670,Immunoreactive protein Se23.5 (Fragment)	426,Immunoreactive protein Se23.5 (Fragment)	1501,Immunoreactive protein Se23.5 (Fragment)	1248,Immunoreactive protein Se23.5 (Fragment)	40,Immunoreactive protein Se23.5 (Fragment)
198,hypothetical protein	299,hypothetical protein	710,hypothetical protein	- , -	- , -	336,hypothetical protein	- , -	1869,hypothetical protein	1564,hypothetical protein	1506,hypothetical protein	1516,hypothetical protein	- , -	1571,hypothetical protein	- , -	137,hypothetical protein	- , -	427,hypothetical protein	- , -	- , -	- , -
199,SSU ribosomal protein S16p	298,SSU ribosomal protein S16p	709,SSU ribosomal protein S16p	693,SSU ribosomal protein S16p	1915,SSU ribosomal protein S16p	337,SSU ribosomal protein S16p	878,SSU ribosomal protein S16p	1870,SSU ribosomal protein S16p	1563,SSU ribosomal protein S16p	1505,SSU ribosomal protein S16p	1515,SSU ribosomal protein S16p	1158,SSU ribosomal protein S16p	1572,SSU ribosomal protein S16p	378,SSU ribosomal protein S16p	138,SSU ribosomal protein S16p	1669,SSU ribosomal protein S16p	428,SSU ribosomal protein S16p	1499,SSU ribosomal protein S16p	1250,SSU ribosomal protein S16p	39,SSU ribosomal protein S16p
200,KH domain RNA binding protein YlqC	297,KH domain RNA binding protein YlqC	708,KH domain RNA binding protein YlqC	692,KH domain RNA binding protein YlqC	1914,KH domain RNA binding protein YlqC	338,KH domain RNA binding protein YlqC	877,KH domain RNA binding protein YlqC	1871,KH domain RNA binding protein YlqC	1562,KH domain RNA binding protein YlqC	1504,KH domain RNA binding protein YlqC	1514,KH domain RNA binding protein YlqC	1159,KH domain RNA binding protein YlqC	1573,KH domain RNA binding protein YlqC	377,KH domain RNA binding protein YlqC	139,KH domain RNA binding protein YlqC	1668,KH domain RNA binding protein YlqC	429,KH domain RNA binding protein YlqC	1498,KH domain RNA binding protein YlqC	1251,KH domain RNA binding protein YlqC	38,KH domain RNA binding protein YlqC
201,16S rRNA processing protein RimM	295,16S rRNA processing protein RimM	706,16S rRNA processing protein RimM	690,16S rRNA processing protein RimM	1913,16S rRNA processing protein RimM	339,16S rRNA processing protein RimM	875,16S rRNA processing protein RimM	1873,16S rRNA processing protein RimM	1560,16S rRNA processing protein RimM	1502,16S rRNA processing protein RimM	1512,16S rRNA processing protein RimM	1161,16S rRNA processing protein RimM	1575,16S rRNA processing protein RimM	375,16S rRNA processing protein RimM	140,16S rRNA processing protein RimM	1666,16S rRNA processing protein RimM	431,16S rRNA processing protein RimM	1496,16S rRNA processing protein RimM	1253,16S rRNA processing protein RimM	37,16S rRNA processing protein RimM
202,tRNA (Guanine37-N1) -methyltransferase	294,tRNA (Guanine37-N1) -methyltransferase	705,tRNA (Guanine37-N1) -methyltransferase	689,tRNA (Guanine37-N1) -methyltransferase	1912,tRNA (Guanine37-N1) -methyltransferase	340,tRNA (Guanine37-N1) -methyltransferase	874,tRNA (Guanine37-N1) -methyltransferase	1874,tRNA (Guanine37-N1) -methyltransferase	1559,tRNA (Guanine37-N1) -methyltransferase	1501,tRNA (Guanine37-N1) -methyltransferase	1511,tRNA (Guanine37-N1) -methyltransferase	1162,tRNA (Guanine37-N1) -methyltransferase	1576,tRNA (Guanine37-N1) -methyltransferase	374,tRNA (Guanine37-N1) -methyltransferase	141,tRNA (Guanine37-N1) -methyltransferase	1665,tRNA (Guanine37-N1) -methyltransferase	432,tRNA (Guanine37-N1) -methyltransferase	1495,tRNA (Guanine37-N1) -methyltransferase	1254,tRNA (Guanine37-N1) -methyltransferase	36,tRNA (Guanine37-N1) -methyltransferase
203,Thioredoxin reductase	293,Thioredoxin reductase	704,Thioredoxin reductase	688,Thioredoxin reductase	1911,Thioredoxin reductase	341,Thioredoxin reductase	873,Thioredoxin reductase	1875,Thioredoxin reductase	1558,Thioredoxin reductase	1500,Thioredoxin reductase	1510,Thioredoxin reductase	1163,Thioredoxin reductase	1577,Thioredoxin reductase	373,Thioredoxin reductase	142,Thioredoxin reductase	1664,Thioredoxin reductase	433,Thioredoxin reductase	1494,Thioredoxin reductase	1255,Thioredoxin reductase	35,Thioredoxin reductase
204,membrane protein, putative	292,membrane protein, putative	703,membrane protein, putative	687,membrane protein, putative	1910,membrane protein, putative	342,membrane protein, putative	872,membrane protein, putative	1876,membrane protein, putative	1557,membrane protein, putative	1499,membrane protein, putative	1509,membrane protein, putative	1164,membrane protein, putative	1578,membrane protein, putative	372,membrane protein, putative	143,membrane protein, putative	1663,membrane protein, putative	434,membrane protein, putative	1493,membrane protein, putative	1256,membrane protein, putative	34,membrane protein, putative
205,2-dehydropantoate 2-reductase	291,2-dehydropantoate 2-reductase	702,2-dehydropantoate 2-reductase	686,2-dehydropantoate 2-reductase	1909,2-dehydropantoate 2-reductase	343,2-dehydropantoate 2-reductase	871,2-dehydropantoate 2-reductase	1877,2-dehydropantoate 2-reductase	1556,2-dehydropantoate 2-reductase	1498,2-dehydropantoate 2-reductase	1508,2-dehydropantoate 2-reductase	1165,2-dehydropantoate 2-reductase	1579,2-dehydropantoate 2-reductase	371,2-dehydropantoate 2-reductase	144,2-dehydropantoate 2-reductase	1662,2-dehydropantoate 2-reductase	435,2-dehydropantoate 2-reductase	1492,2-dehydropantoate 2-reductase	1257,2-dehydropantoate 2-reductase	33,2-dehydropantoate 2-reductase
206,Transcriptional repressor of the fructose operon, DeoR family	290,Transcriptional repressor of the fructose operon, DeoR family	69,Transcriptional repressor of the fructose operon, DeoR family	685,Transcriptional repressor of the fructose operon, DeoR family	1908,Transcriptional repressor of the fructose operon, DeoR family	344,Transcriptional repressor of the fructose operon, DeoR family	305,Transcriptional repressor of the fructose operon, DeoR family	517,Transcriptional repressor of the fructose operon, DeoR family	1045,Transcriptional repressor of the fructose operon, DeoR family	857,Transcriptional repressor of the fructose operon, DeoR family	916,Transcriptional repressor of the fructose operon, DeoR family	1166,Transcriptional repressor of the fructose operon, DeoR family	885,Transcriptional repressor of the fructose operon, DeoR family	370,Transcriptional repressor of the fructose operon, DeoR family	145,Transcriptional repressor of the fructose operon, DeoR family	1661,Transcriptional repressor of the fructose operon, DeoR family	436,Transcriptional repressor of the fructose operon, DeoR family	1491,Transcriptional repressor of the fructose operon, DeoR family	1258,Transcriptional repressor of the fructose operon, DeoR family	32,Transcriptional repressor of the fructose operon, DeoR family
207,1-phosphofructokinase	289,1-phosphofructokinase	70,1-phosphofructokinase	684,1-phosphofructokinase	1907,1-phosphofructokinase	345,1-phosphofructokinase	306,1-phosphofructokinase	518,1-phosphofructokinase	1046,1-phosphofructokinase	858,1-phosphofructokinase	915,1-phosphofructokinase	1167,1-phosphofructokinase	884,1-phosphofructokinase	369,1-phosphofructokinase	146,1-phosphofructokinase	1660,1-phosphofructokinase	437,1-phosphofructokinase	1490,1-phosphofructokinase	1259,1-phosphofructokinase	31,1-phosphofructokinase
208,PTS system, fructose-specific IIA component / PTS system, fructose-specific IIB component / PTS system, fructose-specific IIC component	288,PTS system, fructose-specific IIA component / PTS system, fructose-specific IIB component / PTS system, fructose-specific IIC component	71,PTS system, fructose-specific IIA component / PTS system, fructose-specific IIB component / PTS system, fructose-specific IIC component	683,PTS system, fructose-specific IIA component / PTS system, fructose-specific IIB component / PTS system, fructose-specific IIC component	1906,PTS system, fructose-specific IIA component / PTS system, fructose-specific IIB component / PTS system, fructose-specific IIC component	346,PTS system, fructose-specific IIA component / PTS system, fructose-specific IIB component / PTS system, fructose-specific IIC component	307,PTS system, fructose-specific IIA component / PTS system, fructose-specific IIB component / PTS system, fructose-specific IIC component	519,PTS system, fructose-specific IIA component / PTS system, fructose-specific IIB component / PTS system, fructose-specific IIC component	1047,PTS system, fructose-specific IIA component / PTS system, fructose-specific IIB component / PTS system, fructose-specific IIC component	859,PTS system, fructose-specific IIA component / PTS system, fructose-specific IIB component / PTS system, fructose-specific IIC component	914,PTS system, fructose-specific IIA component / PTS system, fructose-specific IIB component / PTS system, fructose-specific IIC component	1168,PTS system, fructose-specific IIA component / PTS system, fructose-specific IIB component / PTS system, fructose-specific IIC component	883,PTS system, fructose-specific IIA component / PTS system, fructose-specific IIB component / PTS system, fructose-specific IIC component	368,PTS system, fructose-specific IIA component / PTS system, fructose-specific IIB component / PTS system, fructose-specific IIC component	147,PTS system, fructose-specific IIA component / PTS system, fructose-specific IIB component / PTS system, fructose-specific IIC component	1659,PTS system, fructose-specific IIA component / PTS system, fructose-specific IIB component / PTS system, fructose-specific IIC component	438,PTS system, fructose-specific IIA component / PTS system, fructose-specific IIB component / PTS system, fructose-specific IIC component	1489,PTS system, fructose-specific IIA component / PTS system, fructose-specific IIB component / PTS system, fructose-specific IIC component	1260,PTS system, fructose-specific IIA component / PTS system, fructose-specific IIB component / PTS system, fructose-specific IIC component	30,PTS system, fructose-specific IIA component / PTS system, fructose-specific IIB component / PTS system, fructose-specific IIC component
1780,Enolase	1956,Enolase	199,Enolase	120,Enolase	1665,Enolase	732,Enolase	1845,Enolase	1368,Enolase	1390,Enolase	1340,Enolase	1338,Enolase	1634,Enolase	1359,Enolase	311,Enolase	1362,Enolase	153,Enolase	1849,Enolase	1692,Enolase	1680,Enolase	1554,Enolase
1781,hypothetical protein	1955,hypothetical protein	198,hypothetical protein	119,hypothetical protein	1664,hypothetical protein	731,hypothetical protein	1846,hypothetical protein	1367,hypothetical protein	1391,hypothetical protein	1341,hypothetical protein	1339,hypothetical protein	1633,hypothetical protein	1358,hypothetical protein	310,hypothetical protein	1363,hypothetical protein	154,hypothetical protein	1848,hypothetical protein	1693,hypothetical protein	1681,hypothetical protein	1555,hypothetical protein
1782,Septation ring formation regulator EzrA	1954,Septation ring formation regulator EzrA	197,Septation ring formation regulator EzrA	118,Septation ring formation regulator EzrA	1663,Septation ring formation regulator EzrA	730,Septation ring formation regulator EzrA	117,Septation ring formation regulator EzrA	1366,Septation ring formation regulator EzrA	1392,Septation ring formation regulator EzrA	1342,Septation ring formation regulator EzrA	1340,Septation ring formation regulator EzrA	1632,Septation ring formation regulator EzrA	1357,Septation ring formation regulator EzrA	309,Septation ring formation regulator EzrA	1364,Septation ring formation regulator EzrA	155,Septation ring formation regulator EzrA	1847,Septation ring formation regulator EzrA	1694,Septation ring formation regulator EzrA	1682,Septation ring formation regulator EzrA	1556,Septation ring formation regulator EzrA
1783,DNA gyrase subunit B	1953,DNA gyrase subunit B	196,DNA gyrase subunit B	117,DNA gyrase subunit B	1662,DNA gyrase subunit B	729,DNA gyrase subunit B	116,DNA gyrase subunit B	1365,DNA gyrase subunit B	1393,DNA gyrase subunit B	1343,DNA gyrase subunit B	1341,DNA gyrase subunit B	1631,DNA gyrase subunit B	1356,DNA gyrase subunit B	308,DNA gyrase subunit B	1365,DNA gyrase subunit B	156,DNA gyrase subunit B	1846,DNA gyrase subunit B	1695,DNA gyrase subunit B	1683,DNA gyrase subunit B	1557,DNA gyrase subunit B
1784,hydrolase, haloacid dehalogenase-like family	1952,hydrolase, haloacid dehalogenase-like family	195,hydrolase, haloacid dehalogenase-like family	116,hydrolase, haloacid dehalogenase-like family	1661,hydrolase, haloacid dehalogenase-like family	728,hydrolase, haloacid dehalogenase-like family	115,hydrolase, haloacid dehalogenase-like family	1364,hydrolase, haloacid dehalogenase-like family	1394,hydrolase, haloacid dehalogenase-like family	1344,hydrolase, haloacid dehalogenase-like family	1342,hydrolase, haloacid dehalogenase-like family	1630,hydrolase, haloacid dehalogenase-like family	1355,hydrolase, haloacid dehalogenase-like family	307,hydrolase, haloacid dehalogenase-like family	1366,hydrolase, haloacid dehalogenase-like family	157,hydrolase, haloacid dehalogenase-like family	1845,hydrolase, haloacid dehalogenase-like family	1696,hydrolase, haloacid dehalogenase-like family	1684,hydrolase, haloacid dehalogenase-like family	1558,hydrolase, haloacid dehalogenase-like family
1785,Cell division protein FtsW	1951,Cell division protein FtsW	194,Cell division protein FtsW	115,Cell division protein FtsW	1660,Cell division protein FtsW	727,Cell division protein FtsW	114,Cell division protein FtsW	1363,Cell division protein FtsW	1395,Cell division protein FtsW	1345,Cell division protein FtsW	1343,Cell division protein FtsW	1629,Cell division protein FtsW	1354,Cell division protein FtsW	306,Cell division protein FtsW	1367,Cell division protein FtsW	158,Cell division protein FtsW	1844,Cell division protein FtsW	1697,Cell division protein FtsW	1685,Cell division protein FtsW	1559,Cell division protein FtsW
1786,Putative DNA-binding protein in cluster with Type I restriction-modification system	1950,Putative DNA-binding protein in cluster with Type I restriction-modification system	- , -	114,Putative DNA-binding protein in cluster with Type I restriction-modification system	1659,Putative DNA-binding protein in cluster with Type I restriction-modification system	726,Putative DNA-binding protein in cluster with Type I restriction-modification system	112,hypothetical protein	- , -	- , -	- , -	- , -	1628,Putative DNA-binding protein in cluster with Type I restriction-modification system	- , -	305,Putative DNA-binding protein in cluster with Type I restriction-modification system	1368,Putative DNA-binding protein in cluster with Type I restriction-modification system	159,Putative DNA-binding protein in cluster with Type I restriction-modification system	1843,Putative DNA-binding protein in cluster with Type I restriction-modification system	1698,Putative DNA-binding protein in cluster with Type I restriction-modification system	1686,Putative DNA-binding protein in cluster with Type I restriction-modification system	1560,Putative DNA-binding protein in cluster with Type I restriction-modification system
1787,hypothetical protein	1949,hypothetical protein	192,hypothetical protein	113,hypothetical protein	1658,hypothetical protein	725,hypothetical protein	111,hypothetical protein	1551,hypothetical protein	1652,hypothetical protein	1487,hypothetical protein	1498,hypothetical protein	1627,hypothetical protein	1489,hypothetical protein	304,hypothetical protein	1369,hypothetical protein	160,hypothetical protein	1842,hypothetical protein	1699,hypothetical protein	1687,hypothetical protein	1561,hypothetical protein
1788,LSU ribosomal protein L19p	1948,LSU ribosomal protein L19p	787,LSU ribosomal protein L19p	112,LSU ribosomal protein L19p	1657,LSU ribosomal protein L19p	724,LSU ribosomal protein L19p	110,LSU ribosomal protein L19p	1552,LSU ribosomal protein L19p	1651,LSU ribosomal protein L19p	1488,LSU ribosomal protein L19p	1497,LSU ribosomal protein L19p	1626,LSU ribosomal protein L19p	1488,LSU ribosomal protein L19p	303,LSU ribosomal protein L19p	1370,LSU ribosomal protein L19p	161,LSU ribosomal protein L19p	1841,LSU ribosomal protein L19p	1700,LSU ribosomal protein L19p	1688,LSU ribosomal protein L19p	1562,LSU ribosomal protein L19p
1789,Chloride channel protein	1947,Chloride channel protein	788,Chloride channel protein	111,Chloride channel protein	1656,Chloride channel protein	723,Chloride channel protein	109,Chloride channel protein	1553,Chloride channel protein	1650,Chloride channel protein	1489,Chloride channel protein	1496,Chloride channel protein	1625,Chloride channel protein	1487,Chloride channel protein	302,Chloride channel protein	1371,Chloride channel protein	162,Chloride channel protein	1840,Chloride channel protein	1701,Chloride channel protein	1689,Chloride channel protein	1563,Chloride channel protein
1790,Chorismate mutase I # AroHI	1946,Chorismate mutase I # AroHI	789,Chorismate mutase I # AroHI	110,Chorismate mutase I # AroHI	1655,Chorismate mutase I # AroHI	722,Chorismate mutase I # AroHI	108,Chorismate mutase I # AroHI	1554,Chorismate mutase I # AroHI	1649,Chorismate mutase I # AroHI	1490,Chorismate mutase I # AroHI	1495,Chorismate mutase I # AroHI	1624,Chorismate mutase I # AroHI	1486,Chorismate mutase I # AroHI	301,Chorismate mutase I # AroHI	1372,Chorismate mutase I # AroHI	163,Chorismate mutase I # AroHI	1839,Chorismate mutase I # AroHI	1702,Chorismate mutase I # AroHI	1690,Chorismate mutase I # AroHI	1564,Chorismate mutase I # AroHI
1791,Flavodoxin	1945,Flavodoxin	790,Flavodoxin	109,Flavodoxin	1654,Flavodoxin	721,Flavodoxin	107,Flavodoxin	1555,Flavodoxin	1648,Flavodoxin	1491,Flavodoxin	1494,Flavodoxin	1623,Flavodoxin	1485,Flavodoxin	300,Flavodoxin	1373,Flavodoxin	164,Flavodoxin	1838,Flavodoxin	1703,Flavodoxin	1691,Flavodoxin	1565,Flavodoxin
1792,Adenosine deaminase	1944,Adenosine deaminase	791,Adenosine deaminase	108,Adenosine deaminase	1653,Adenosine deaminase	720,Adenosine deaminase	106,Adenosine deaminase	329,Adenosine deaminase	213,Adenosine deaminase	105,Adenosine deaminase	356,Adenosine deaminase	1622,Adenosine deaminase	208,Adenosine deaminase	299,Adenosine deaminase	1374,Adenosine deaminase	165,Adenosine deaminase	1837,Adenosine deaminase	1704,Adenosine deaminase	1692,Adenosine deaminase	1566,Adenosine deaminase
1793,Glutathione S-transferase, Streptococcal type	1943,Glutathione S-transferase, Streptococcal type	792,Glutathione S-transferase, Streptococcal type	107,Glutathione S-transferase, Streptococcal type	1652,Glutathione S-transferase, Streptococcal type	719,Glutathione S-transferase, Streptococcal type	105,Glutathione S-transferase, Streptococcal type	328,Glutathione S-transferase, Streptococcal type	212,Glutathione S-transferase, Streptococcal type	106,Glutathione S-transferase, Streptococcal type	355,Glutathione S-transferase, Streptococcal type	1621,Glutathione S-transferase, Streptococcal type	207,Glutathione S-transferase, Streptococcal type	298,Glutathione S-transferase, Streptococcal type	1375,Glutathione S-transferase, Streptococcal type	166,Glutathione S-transferase, Streptococcal type	1836,Glutathione S-transferase, Streptococcal type	1705,Glutathione S-transferase, Streptococcal type	1693,Glutathione S-transferase, Streptococcal type	1567,Glutathione S-transferase, Streptococcal type
1794,FIG146085: 3-to-5 oligoribonuclease A, Bacillus type	1942,FIG146085: 3-to-5 oligoribonuclease A, Bacillus type	793,FIG146085: 3-to-5 oligoribonuclease A, Bacillus type	105,FIG146085: 3-to-5 oligoribonuclease A, Bacillus type	1651,FIG146085: 3-to-5 oligoribonuclease A, Bacillus type	718,FIG146085: 3-to-5 oligoribonuclease A, Bacillus type	104,FIG146085: 3-to-5 oligoribonuclease A, Bacillus type	327,FIG146085: 3-to-5 oligoribonuclease A, Bacillus type	211,FIG146085: 3-to-5 oligoribonuclease A, Bacillus type	107,FIG146085: 3-to-5 oligoribonuclease A, Bacillus type	354,FIG146085: 3-to-5 oligoribonuclease A, Bacillus type	1619,FIG146085: 3-to-5 oligoribonuclease A, Bacillus type	206,FIG146085: 3-to-5 oligoribonuclease A, Bacillus type	297,FIG146085: 3-to-5 oligoribonuclease A, Bacillus type	1376,FIG146085: 3-to-5 oligoribonuclease A, Bacillus type	167,FIG146085: 3-to-5 oligoribonuclease A, Bacillus type	1835,FIG146085: 3-to-5 oligoribonuclease A, Bacillus type	1707,FIG146085: 3-to-5 oligoribonuclease A, Bacillus type	1695,FIG146085: 3-to-5 oligoribonuclease A, Bacillus type	1568,FIG146085: 3-to-5 oligoribonuclease A, Bacillus type
1795,LSU ribosomal protein L31p @ LSU ribosomal protein L31p, zinc-independent	1941,LSU ribosomal protein L31p @ LSU ribosomal protein L31p, zinc-independent	794,LSU ribosomal protein L31p @ LSU ribosomal protein L31p, zinc-independent	104,LSU ribosomal protein L31p @ LSU ribosomal protein L31p, zinc-independent	1650,LSU ribosomal protein L31p @ LSU ribosomal protein L31p, zinc-independent	717,LSU ribosomal protein L31p @ LSU ribosomal protein L31p, zinc-independent	103,LSU ribosomal protein L31p @ LSU ribosomal protein L31p, zinc-independent	326,LSU ribosomal protein L31p @ LSU ribosomal protein L31p, zinc-independent	210,LSU ribosomal protein L31p @ LSU ribosomal protein L31p, zinc-independent	108,LSU ribosomal protein L31p @ LSU ribosomal protein L31p, zinc-independent	353,LSU ribosomal protein L31p @ LSU ribosomal protein L31p, zinc-independent	1618,LSU ribosomal protein L31p @ LSU ribosomal protein L31p, zinc-independent	205,LSU ribosomal protein L31p @ LSU ribosomal protein L31p, zinc-independent	296,LSU ribosomal protein L31p @ LSU ribosomal protein L31p, zinc-independent	1377,LSU ribosomal protein L31p @ LSU ribosomal protein L31p, zinc-independent	168,LSU ribosomal protein L31p @ LSU ribosomal protein L31p, zinc-independent	1834,LSU ribosomal protein L31p @ LSU ribosomal protein L31p, zinc-independent	1708,LSU ribosomal protein L31p @ LSU ribosomal protein L31p, zinc-independent	1696,LSU ribosomal protein L31p @ LSU ribosomal protein L31p, zinc-independent	1569,LSU ribosomal protein L31p @ LSU ribosomal protein L31p, zinc-independent
1796,PTS system, galactosamine-specific IIA component	1940,PTS system, galactosamine-specific IIA component	795,PTS system, galactosamine-specific IIA component	103,PTS system, galactosamine-specific IIA component	1649,PTS system, galactosamine-specific IIA component	716,PTS system, galactosamine-specific IIA component	102,PTS system, galactosamine-specific IIA component	325,PTS system, galactosamine-specific IIA component	209,PTS system, galactosamine-specific IIA component	109,PTS system, galactosamine-specific IIA component	352,PTS system, galactosamine-specific IIA component	1617,PTS system, galactosamine-specific IIA component	204,PTS system, galactosamine-specific IIA component	295,PTS system, galactosamine-specific IIA component	1378,PTS system, galactosamine-specific IIA component	169,PTS system, galactosamine-specific IIA component	1833,PTS system, galactosamine-specific IIA component	1709,PTS system, galactosamine-specific IIA component	1697,PTS system, galactosamine-specific IIA component	1570,PTS system, galactosamine-specific IIA component
1797,PTS system, galactosamine-specific IID component	1939,PTS system, galactosamine-specific IID component	796,PTS system, galactosamine-specific IID component	102,PTS system, galactosamine-specific IID component	1648,PTS system, galactosamine-specific IID component	715,PTS system, galactosamine-specific IID component	101,PTS system, galactosamine-specific IID component	324,PTS system, galactosamine-specific IID component	208,PTS system, galactosamine-specific IID component	110,PTS system, galactosamine-specific IID component	351,PTS system, galactosamine-specific IID component	1616,PTS system, galactosamine-specific IID component	203,PTS system, galactosamine-specific IID component	294,PTS system, galactosamine-specific IID component	1379,PTS system, galactosamine-specific IID component	170,PTS system, galactosamine-specific IID component	1832,PTS system, galactosamine-specific IID component	1710,PTS system, galactosamine-specific IID component	1698,PTS system, galactosamine-specific IID component	1571,PTS system, galactosamine-specific IID component
1798,PTS system, mannose-specific IIC component	1938,PTS system, mannose-specific IIC component	797,PTS system, mannose-specific IIC component	101,PTS system, mannose-specific IIC component	1647,PTS system, mannose-specific IIC component	714,PTS system, mannose-specific IIC component	100,PTS system, mannose-specific IIC component	323,PTS system, mannose-specific IIC component	207,PTS system, mannose-specific IIC component	111,PTS system, mannose-specific IIC component	350,PTS system, mannose-specific IIC component	1615,PTS system, mannose-specific IIC component	202,PTS system, mannose-specific IIC component	293,PTS system, mannose-specific IIC component	1380,PTS system, mannose-specific IIC component	171,PTS system, mannose-specific IIC component	1831,PTS system, mannose-specific IIC component	1711,PTS system, mannose-specific IIC component	1699,PTS system, mannose-specific IIC component	1573,PTS system, mannose-specific IIC component
1799,PTS system, mannose-specific IIB component	1937,PTS system, mannose-specific IIB component	798,PTS system, mannose-specific IIB component	100,PTS system, mannose-specific IIB component	1646,PTS system, mannose-specific IIB component	713,PTS system, mannose-specific IIB component	99,PTS system, mannose-specific IIB component	322,PTS system, mannose-specific IIB component	206,PTS system, mannose-specific IIB component	112,PTS system, mannose-specific IIB component	349,PTS system, mannose-specific IIB component	1614,PTS system, mannose-specific IIB component	201,PTS system, mannose-specific IIB component	292,PTS system, mannose-specific IIB component	1381,PTS system, mannose-specific IIB component	172,PTS system, mannose-specific IIB component	1830,PTS system, mannose-specific IIB component	1712,PTS system, mannose-specific IIB component	1700,PTS system, mannose-specific IIB component	1574,PTS system, mannose-specific IIB component
1800,Beta-galactosidase 3	1936,Beta-galactosidase 3	799,Beta-galactosidase 3	99,Beta-galactosidase 3	1645,Beta-galactosidase 3	712,Beta-galactosidase 3	98,Beta-galactosidase 3	321,Beta-galactosidase 3	205,Beta-galactosidase 3	113,Beta-galactosidase 3	348,Beta-galactosidase 3	1613,Beta-galactosidase 3	200,Beta-galactosidase 3	291,Beta-galactosidase 3	1382,Beta-galactosidase 3	173,Beta-galactosidase 3	1829,Beta-galactosidase 3	1713,Beta-galactosidase 3	1701,Beta-galactosidase 3	1575,Beta-galactosidase 3
1801,Transcriptional regulator, GntR family	1935,Transcriptional regulator, GntR family	800,Transcriptional regulator, GntR family	98,Transcriptional regulator, GntR family	1644,Transcriptional regulator, GntR family	711,Transcriptional regulator, GntR family	97,Transcriptional regulator, GntR family	320,Transcriptional regulator, GntR family	204,Transcriptional regulator, GntR family	114,Transcriptional regulator, GntR family	347,Transcriptional regulator, GntR family	1612,Transcriptional regulator, GntR family	199,Transcriptional regulator, GntR family	290,Transcriptional regulator, GntR family	1383,Transcriptional regulator, GntR family	174,Transcriptional regulator, GntR family	1828,Transcriptional regulator, GntR family	1714,Transcriptional regulator, GntR family	1702,Transcriptional regulator, GntR family	1576,Transcriptional regulator, GntR family
1802,Galactosamine-6-phosphate isomerase	1934,Galactosamine-6-phosphate isomerase	801,Galactosamine-6-phosphate isomerase	97,Galactosamine-6-phosphate isomerase	1643,Galactosamine-6-phosphate isomerase	710,Galactosamine-6-phosphate isomerase	96,Galactosamine-6-phosphate isomerase	319,Galactosamine-6-phosphate isomerase	203,Galactosamine-6-phosphate isomerase	115,Galactosamine-6-phosphate isomerase	346,Galactosamine-6-phosphate isomerase	1611,Galactosamine-6-phosphate isomerase	198,Galactosamine-6-phosphate isomerase	289,Galactosamine-6-phosphate isomerase	1384,Galactosamine-6-phosphate isomerase	175,Galactosamine-6-phosphate isomerase	1827,Galactosamine-6-phosphate isomerase	1715,Galactosamine-6-phosphate isomerase	1703,Galactosamine-6-phosphate isomerase	1577,Galactosamine-6-phosphate isomerase
1803,Predicted transcriptional regulator of N-Acetylglucosamine utilization, GntR family	1933,Predicted transcriptional regulator of N-Acetylglucosamine utilization, GntR family	802,Predicted transcriptional regulator of N-Acetylglucosamine utilization, GntR family	96,Predicted transcriptional regulator of N-Acetylglucosamine utilization, GntR family	1642,Predicted transcriptional regulator of N-Acetylglucosamine utilization, GntR family	709,Predicted transcriptional regulator of N-Acetylglucosamine utilization, GntR family	95,Predicted transcriptional regulator of N-Acetylglucosamine utilization, GntR family	318,Predicted transcriptional regulator of N-Acetylglucosamine utilization, GntR family	202,Predicted transcriptional regulator of N-Acetylglucosamine utilization, GntR family	116,Predicted transcriptional regulator of N-Acetylglucosamine utilization, GntR family	345,Predicted transcriptional regulator of N-Acetylglucosamine utilization, GntR family	1610,Predicted transcriptional regulator of N-Acetylglucosamine utilization, GntR family	197,Predicted transcriptional regulator of N-Acetylglucosamine utilization, GntR family	288,Predicted transcriptional regulator of N-Acetylglucosamine utilization, GntR family	1385,Predicted transcriptional regulator of N-Acetylglucosamine utilization, GntR family	176,Predicted transcriptional regulator of N-Acetylglucosamine utilization, GntR family	1826,Predicted transcriptional regulator of N-Acetylglucosamine utilization, GntR family	1716,Predicted transcriptional regulator of N-Acetylglucosamine utilization, GntR family	1704,Predicted transcriptional regulator of N-Acetylglucosamine utilization, GntR family	1578,Predicted transcriptional regulator of N-Acetylglucosamine utilization, GntR family
1804,hypothetical protein	1932,hypothetical protein	803,hypothetical protein	95,hypothetical protein	1641,hypothetical protein	708,hypothetical protein	94,hypothetical protein	317,hypothetical protein	201,hypothetical protein	117,hypothetical protein	344,hypothetical protein	1609,hypothetical protein	196,hypothetical protein	287,hypothetical protein	1386,hypothetical protein	177,hypothetical protein	1825,hypothetical protein	1717,hypothetical protein	1705,hypothetical protein	1579,hypothetical protein
1805,Candidate zinc-binding lipoprotein ZinT	1931,Candidate zinc-binding lipoprotein ZinT	804,Candidate zinc-binding lipoprotein ZinT	94,Candidate zinc-binding lipoprotein ZinT	1640,Candidate zinc-binding lipoprotein ZinT	707,Candidate zinc-binding lipoprotein ZinT	93,Candidate zinc-binding lipoprotein ZinT	316,Candidate zinc-binding lipoprotein ZinT	200,Candidate zinc-binding lipoprotein ZinT	118,Candidate zinc-binding lipoprotein ZinT	343,Candidate zinc-binding lipoprotein ZinT	1608,Candidate zinc-binding lipoprotein ZinT	195,Candidate zinc-binding lipoprotein ZinT	286,Candidate zinc-binding lipoprotein ZinT	1387,Candidate zinc-binding lipoprotein ZinT	178,Candidate zinc-binding lipoprotein ZinT	1824,Candidate zinc-binding lipoprotein ZinT	1718,Candidate zinc-binding lipoprotein ZinT	1706,Candidate zinc-binding lipoprotein ZinT	1580,Candidate zinc-binding lipoprotein ZinT
1806,Dipeptidase	1930,Dipeptidase	805,Dipeptidase	93,Dipeptidase	1639,Dipeptidase	847,Dipeptidase	92,Dipeptidase	315,Dipeptidase	199,Dipeptidase	119,Dipeptidase	342,Dipeptidase	1607,Dipeptidase	194,Dipeptidase	285,Dipeptidase	1388,Dipeptidase	179,Dipeptidase	1823,Dipeptidase	1719,Dipeptidase	1707,Dipeptidase	1581,Dipeptidase
1807,FIG001886: Cytoplasmic hypothetical protein	1929,FIG001886: Cytoplasmic hypothetical protein	806,FIG001886: Cytoplasmic hypothetical protein	92,FIG001886: Cytoplasmic hypothetical protein	1638,FIG001886: Cytoplasmic hypothetical protein	848,FIG001886: Cytoplasmic hypothetical protein	91,FIG001886: Cytoplasmic hypothetical protein	314,FIG001886: Cytoplasmic hypothetical protein	198,FIG001886: Cytoplasmic hypothetical protein	120,FIG001886: Cytoplasmic hypothetical protein	341,FIG001886: Cytoplasmic hypothetical protein	1606,FIG001886: Cytoplasmic hypothetical protein	193,FIG001886: Cytoplasmic hypothetical protein	284,FIG001886: Cytoplasmic hypothetical protein	1389,FIG001886: Cytoplasmic hypothetical protein	180,FIG001886: Cytoplasmic hypothetical protein	1822,FIG001886: Cytoplasmic hypothetical protein	1720,FIG001886: Cytoplasmic hypothetical protein	1708,FIG001886: Cytoplasmic hypothetical protein	1582,FIG001886: Cytoplasmic hypothetical protein
1808,FIG002813: LPPG:FO 2-phospho-L-lactate transferase like, CofD-like	1928,FIG002813: LPPG:FO 2-phospho-L-lactate transferase like, CofD-like	807,FIG002813: LPPG:FO 2-phospho-L-lactate transferase like, CofD-like	91,FIG002813: LPPG:FO 2-phospho-L-lactate transferase like, CofD-like	1637,FIG002813: LPPG:FO 2-phospho-L-lactate transferase like, CofD-like	849,FIG002813: LPPG:FO 2-phospho-L-lactate transferase like, CofD-like	90,FIG002813: LPPG:FO 2-phospho-L-lactate transferase like, CofD-like	313,FIG002813: LPPG:FO 2-phospho-L-lactate transferase like, CofD-like	197,FIG002813: LPPG:FO 2-phospho-L-lactate transferase like, CofD-like	121,FIG002813: LPPG:FO 2-phospho-L-lactate transferase like, CofD-like	340,FIG002813: LPPG:FO 2-phospho-L-lactate transferase like, CofD-like	1605,FIG002813: LPPG:FO 2-phospho-L-lactate transferase like, CofD-like	192,FIG002813: LPPG:FO 2-phospho-L-lactate transferase like, CofD-like	283,FIG002813: LPPG:FO 2-phospho-L-lactate transferase like, CofD-like	1390,FIG002813: LPPG:FO 2-phospho-L-lactate transferase like, CofD-like	181,FIG002813: LPPG:FO 2-phospho-L-lactate transferase like, CofD-like	1821,FIG002813: LPPG:FO 2-phospho-L-lactate transferase like, CofD-like	1721,FIG002813: LPPG:FO 2-phospho-L-lactate transferase like, CofD-like	1709,FIG002813: LPPG:FO 2-phospho-L-lactate transferase like, CofD-like	1583,FIG002813: LPPG:FO 2-phospho-L-lactate transferase like, CofD-like
1809,Hypothetical ATP-binding protein UPF0042, contains P-loop	1927,Hypothetical ATP-binding protein UPF0042, contains P-loop	808,Hypothetical ATP-binding protein UPF0042, contains P-loop	90,Hypothetical ATP-binding protein UPF0042, contains P-loop	1636,Hypothetical ATP-binding protein UPF0042, contains P-loop	850,Hypothetical ATP-binding protein UPF0042, contains P-loop	89,Hypothetical ATP-binding protein UPF0042, contains P-loop	312,Hypothetical ATP-binding protein UPF0042, contains P-loop	196,Hypothetical ATP-binding protein UPF0042, contains P-loop	122,Hypothetical ATP-binding protein UPF0042, contains P-loop	339,Hypothetical ATP-binding protein UPF0042, contains P-loop	1604,Hypothetical ATP-binding protein UPF0042, contains P-loop	191,Hypothetical ATP-binding protein UPF0042, contains P-loop	282,Hypothetical ATP-binding protein UPF0042, contains P-loop	1391,Hypothetical ATP-binding protein UPF0042, contains P-loop	182,Hypothetical ATP-binding protein UPF0042, contains P-loop	1820,Hypothetical ATP-binding protein UPF0042, contains P-loop	1722,Hypothetical ATP-binding protein UPF0042, contains P-loop	1710,Hypothetical ATP-binding protein UPF0042, contains P-loop	1584,Hypothetical ATP-binding protein UPF0042, contains P-loop
1810,Asparaginyl-tRNA synthetase	1926,Asparaginyl-tRNA synthetase	434,Asparaginyl-tRNA synthetase	89,Asparaginyl-tRNA synthetase	1635,Asparaginyl-tRNA synthetase	851,Asparaginyl-tRNA synthetase	88,Asparaginyl-tRNA synthetase	311,Asparaginyl-tRNA synthetase	195,Asparaginyl-tRNA synthetase	123,Asparaginyl-tRNA synthetase	338,Asparaginyl-tRNA synthetase	1603,Asparaginyl-tRNA synthetase	190,Asparaginyl-tRNA synthetase	281,Asparaginyl-tRNA synthetase	1392,Asparaginyl-tRNA synthetase	183,Asparaginyl-tRNA synthetase	1819,Asparaginyl-tRNA synthetase	1723,Asparaginyl-tRNA synthetase	1711,Asparaginyl-tRNA synthetase	1585,Asparaginyl-tRNA synthetase
1811,hypothetical protein	1925,hypothetical protein	435,hypothetical protein	- , -	- , -	- , -	- , -	310,hypothetical protein	- , -	- , -	- , -	- , -	- , -	- , -	1393,hypothetical protein	- , -	1818,hypothetical protein	1724,hypothetical protein	- , -	- , -
1812,Aspartate aminotransferase	1924,Aspartate aminotransferase	436,Aspartate aminotransferase	88,Aspartate aminotransferase	1634,Aspartate aminotransferase	852,Aspartate aminotransferase	87,Aspartate aminotransferase	309,Aspartate aminotransferase	194,Aspartate aminotransferase	124,Aspartate aminotransferase	337,Aspartate aminotransferase	1602,Aspartate aminotransferase	189,Aspartate aminotransferase	280,Aspartate aminotransferase	1394,Aspartate aminotransferase	184,Aspartate aminotransferase	1817,Aspartate aminotransferase	1725,Aspartate aminotransferase	1712,Aspartate aminotransferase	1586,Aspartate aminotransferase
1813,hypothetical protein	1923,hypothetical protein	437,hypothetical protein	87,hypothetical protein	1633,hypothetical protein	853,hypothetical protein	86,hypothetical protein	308,hypothetical protein	193,hypothetical protein	125,hypothetical protein	336,hypothetical protein	1601,hypothetical protein	188,hypothetical protein	279,hypothetical protein	1395,hypothetical protein	185,hypothetical protein	1816,hypothetical protein	1726,hypothetical protein	1713,hypothetical protein	1587,hypothetical protein
1814,DinG family ATP-dependent helicase YoaA	1922,DinG family ATP-dependent helicase YoaA	438,DinG family ATP-dependent helicase YoaA	86,DinG family ATP-dependent helicase YoaA	1632,DinG family ATP-dependent helicase YoaA	854,DinG family ATP-dependent helicase YoaA	85,DinG family ATP-dependent helicase YoaA	307,DinG family ATP-dependent helicase YoaA	192,DinG family ATP-dependent helicase YoaA	126,DinG family ATP-dependent helicase YoaA	335,DinG family ATP-dependent helicase YoaA	1600,DinG family ATP-dependent helicase YoaA	187,DinG family ATP-dependent helicase YoaA	278,DinG family ATP-dependent helicase YoaA	1396,DinG family ATP-dependent helicase YoaA	186,DinG family ATP-dependent helicase YoaA	1815,DinG family ATP-dependent helicase YoaA	1727,DinG family ATP-dependent helicase YoaA	1714,DinG family ATP-dependent helicase YoaA	1588,DinG family ATP-dependent helicase YoaA
1815,Hydroxyacylglutathione hydrolase	1920,Hydroxyacylglutathione hydrolase	439,Hydroxyacylglutathione hydrolase	84,Hydroxyacylglutathione hydrolase	1630,Hydroxyacylglutathione hydrolase	855,Hydroxyacylglutathione hydrolase	83,Hydroxyacylglutathione hydrolase	306,Hydroxyacylglutathione hydrolase	191,Hydroxyacylglutathione hydrolase	127,Hydroxyacylglutathione hydrolase	334,Hydroxyacylglutathione hydrolase	1598,Hydroxyacylglutathione hydrolase	186,Hydroxyacylglutathione hydrolase	277,Hydroxyacylglutathione hydrolase	1397,Hydroxyacylglutathione hydrolase	187,Hydroxyacylglutathione hydrolase	1814,Hydroxyacylglutathione hydrolase	1729,Hydroxyacylglutathione hydrolase	1716,Hydroxyacylglutathione hydrolase	1130,Hydroxyacylglutathione hydrolase
1816,Cell division protein FtsX	1919,Cell division protein FtsX	440,Cell division protein FtsX	83,Cell division protein FtsX	1629,Cell division protein FtsX	856,Cell division protein FtsX	82,Cell division protein FtsX	305,Cell division protein FtsX	190,Cell division protein FtsX	128,Cell division protein FtsX	333,Cell division protein FtsX	1597,Cell division protein FtsX	185,Cell division protein FtsX	275,Cell division protein FtsX	1398,Cell division protein FtsX	189,Cell division protein FtsX	1813,Cell division protein FtsX	1730,Cell division protein FtsX	1717,Cell division protein FtsX	1128,Cell division protein FtsX
1817,Cell division transporter, ATP-binding protein FtsE (TC 3.A.5.1.1)	1918,Cell division transporter, ATP-binding protein FtsE (TC 3.A.5.1.1)	441,Cell division transporter, ATP-binding protein FtsE (TC 3.A.5.1.1)	82,Cell division transporter, ATP-binding protein FtsE (TC 3.A.5.1.1)	1628,Cell division transporter, ATP-binding protein FtsE (TC 3.A.5.1.1)	857,Cell division transporter, ATP-binding protein FtsE (TC 3.A.5.1.1)	81,Cell division transporter, ATP-binding protein FtsE (TC 3.A.5.1.1)	304,Cell division transporter, ATP-binding protein FtsE (TC 3.A.5.1.1)	189,Cell division transporter, ATP-binding protein FtsE (TC 3.A.5.1.1)	129,Cell division transporter, ATP-binding protein FtsE (TC 3.A.5.1.1)	332,Cell division transporter, ATP-binding protein FtsE (TC 3.A.5.1.1)	1596,Cell division transporter, ATP-binding protein FtsE (TC 3.A.5.1.1)	184,Cell division transporter, ATP-binding protein FtsE (TC 3.A.5.1.1)	274,Cell division transporter, ATP-binding protein FtsE (TC 3.A.5.1.1)	1399,Cell division transporter, ATP-binding protein FtsE (TC 3.A.5.1.1)	190,Cell division transporter, ATP-binding protein FtsE (TC 3.A.5.1.1)	1812,Cell division transporter, ATP-binding protein FtsE (TC 3.A.5.1.1)	1731,Cell division transporter, ATP-binding protein FtsE (TC 3.A.5.1.1)	1718,Cell division transporter, ATP-binding protein FtsE (TC 3.A.5.1.1)	1127,Cell division transporter, ATP-binding protein FtsE (TC 3.A.5.1.1)
1818,Peptide chain release factor 2; programmed frameshift-containing	1917,Peptide chain release factor 2; programmed frameshift-containing	442,Peptide chain release factor 2; programmed frameshift-containing	81,Peptide chain release factor 2; programmed frameshift-containing	1627,Peptide chain release factor 2; programmed frameshift-containing	858,Peptide chain release factor 2; programmed frameshift-containing	80,Peptide chain release factor 2; programmed frameshift-containing	303,Peptide chain release factor 2; programmed frameshift-containing	188,Peptide chain release factor 2; programmed frameshift-containing	130,Peptide chain release factor 2; programmed frameshift-containing	331,Peptide chain release factor 2; programmed frameshift-containing	1595,Peptide chain release factor 2; programmed frameshift-containing	183,Peptide chain release factor 2; programmed frameshift-containing	273,Peptide chain release factor 2; programmed frameshift-containing	1400,Peptide chain release factor 2; programmed frameshift-containing	191,Peptide chain release factor 2; programmed frameshift-containing	1811,Peptide chain release factor 2; programmed frameshift-containing	1732,Peptide chain release factor 2; programmed frameshift-containing	1719,Peptide chain release factor 2; programmed frameshift-containing	1126,Peptide chain release factor 2; programmed frameshift-containing
1819,Fructose-1,6-bisphosphatase, Bacillus type	1916,Fructose-1,6-bisphosphatase, Bacillus type	443,Fructose-1,6-bisphosphatase, Bacillus type	80,Fructose-1,6-bisphosphatase, Bacillus type	1626,Fructose-1,6-bisphosphatase, Bacillus type	859,Fructose-1,6-bisphosphatase, Bacillus type	79,Fructose-1,6-bisphosphatase, Bacillus type	301,Fructose-1,6-bisphosphatase, Bacillus type	187,Fructose-1,6-bisphosphatase, Bacillus type	131,Fructose-1,6-bisphosphatase, Bacillus type	330,Fructose-1,6-bisphosphatase, Bacillus type	1594,Fructose-1,6-bisphosphatase, Bacillus type	182,Fructose-1,6-bisphosphatase, Bacillus type	272,Fructose-1,6-bisphosphatase, Bacillus type	1401,Fructose-1,6-bisphosphatase, Bacillus type	192,Fructose-1,6-bisphosphatase, Bacillus type	1810,Fructose-1,6-bisphosphatase, Bacillus type	1733,Fructose-1,6-bisphosphatase, Bacillus type	1720,Fructose-1,6-bisphosphatase, Bacillus type	1125,Fructose-1,6-bisphosphatase, Bacillus type
1820,hypothetical protein	1915,hypothetical protein	444,FIG01116407: hypothetical protein	200,hypothetical protein	151,hypothetical protein	860,hypothetical protein	78,hypothetical protein	300,hypothetical protein	186,hypothetical protein	132,hypothetical protein	329,hypothetical protein	186,hypothetical protein	181,hypothetical protein	929,hypothetical protein	1402,hypothetical protein	454,hypothetical protein	1809,hypothetical protein	327,hypothetical protein	372,hypothetical protein	1124,hypothetical protein
1821,Calcium-transporting ATPase	1914,Calcium-transporting ATPase	445,Calcium-transporting ATPase	201,Calcium-transporting ATPase	152,Calcium-transporting ATPase	861,Calcium-transporting ATPase	77,Calcium-transporting ATPase	299,Calcium-transporting ATPase	185,Calcium-transporting ATPase	133,Calcium-transporting ATPase	328,Calcium-transporting ATPase	185,Calcium-transporting ATPase	180,Calcium-transporting ATPase	928,Calcium-transporting ATPase	1403,Calcium-transporting ATPase	453,Calcium-transporting ATPase	1808,Calcium-transporting ATPase	328,Calcium-transporting ATPase	371,Calcium-transporting ATPase	1123,Calcium-transporting ATPase
1822,hypothetical protein	1913,hypothetical protein	447,hypothetical protein	203,hypothetical protein	154,hypothetical protein	862,hypothetical protein	76,hypothetical protein	298,hypothetical protein	184,hypothetical protein	134,hypothetical protein	327,hypothetical protein	183,hypothetical protein	179,hypothetical protein	926,hypothetical protein	1404,hypothetical protein	451,hypothetical protein	1807,hypothetical protein	330,hypothetical protein	369,hypothetical protein	1122,hypothetical protein
1823,Deoxyguanosinetriphosphate triphosphohydrolase	1912,Deoxyguanosinetriphosphate triphosphohydrolase	448,Deoxyguanosinetriphosphate triphosphohydrolase	204,Deoxyguanosinetriphosphate triphosphohydrolase	155,Deoxyguanosinetriphosphate triphosphohydrolase	1530,Deoxyguanosinetriphosphate triphosphohydrolase	75,Deoxyguanosinetriphosphate triphosphohydrolase	297,Deoxyguanosinetriphosphate triphosphohydrolase	183,Deoxyguanosinetriphosphate triphosphohydrolase	135,Deoxyguanosinetriphosphate triphosphohydrolase	326,Deoxyguanosinetriphosphate triphosphohydrolase	182,Deoxyguanosinetriphosphate triphosphohydrolase	178,Deoxyguanosinetriphosphate triphosphohydrolase	925,Deoxyguanosinetriphosphate triphosphohydrolase	1405,Deoxyguanosinetriphosphate triphosphohydrolase	450,Deoxyguanosinetriphosphate triphosphohydrolase	1806,Deoxyguanosinetriphosphate triphosphohydrolase	331,Deoxyguanosinetriphosphate triphosphohydrolase	368,Deoxyguanosinetriphosphate triphosphohydrolase	1121,Deoxyguanosinetriphosphate triphosphohydrolase
1824,Promiscuous sugar phosphatase YidA, haloacid dehalogenase-like phosphatase family	1911,Promiscuous sugar phosphatase YidA, haloacid dehalogenase-like phosphatase family	449,Promiscuous sugar phosphatase YidA, haloacid dehalogenase-like phosphatase family	205,Promiscuous sugar phosphatase YidA, haloacid dehalogenase-like phosphatase family	156,Promiscuous sugar phosphatase YidA, haloacid dehalogenase-like phosphatase family	1531,Promiscuous sugar phosphatase YidA, haloacid dehalogenase-like phosphatase family	74,Promiscuous sugar phosphatase YidA, haloacid dehalogenase-like phosphatase family	296,Promiscuous sugar phosphatase YidA, haloacid dehalogenase-like phosphatase family	182,Promiscuous sugar phosphatase YidA, haloacid dehalogenase-like phosphatase family	136,Promiscuous sugar phosphatase YidA, haloacid dehalogenase-like phosphatase family	325,Promiscuous sugar phosphatase YidA, haloacid dehalogenase-like phosphatase family	181,Promiscuous sugar phosphatase YidA, haloacid dehalogenase-like phosphatase family	177,Promiscuous sugar phosphatase YidA, haloacid dehalogenase-like phosphatase family	924,Promiscuous sugar phosphatase YidA, haloacid dehalogenase-like phosphatase family	1406,Promiscuous sugar phosphatase YidA, haloacid dehalogenase-like phosphatase family	449,Promiscuous sugar phosphatase YidA, haloacid dehalogenase-like phosphatase family	1805,Promiscuous sugar phosphatase YidA, haloacid dehalogenase-like phosphatase family	332,Promiscuous sugar phosphatase YidA, haloacid dehalogenase-like phosphatase family	367,Promiscuous sugar phosphatase YidA, haloacid dehalogenase-like phosphatase family	1120,Promiscuous sugar phosphatase YidA, haloacid dehalogenase-like phosphatase family
1825,tRNA-dependent lipid II--L-alanine ligase	1910,tRNA-dependent lipid II--L-alanine ligase	450,tRNA-dependent lipid II--L-alanine ligase	206,tRNA-dependent lipid II--L-alanine ligase	157,tRNA-dependent lipid II--L-alanine ligase	1532,tRNA-dependent lipid II--L-alanine ligase	73,tRNA-dependent lipid II--L-alanine ligase	295,tRNA-dependent lipid II--L-alanine ligase	181,tRNA-dependent lipid II--L-alanine ligase	137,tRNA-dependent lipid II--L-alanine ligase	324,tRNA-dependent lipid II--L-alanine ligase	180,tRNA-dependent lipid II--L-alanine ligase	176,tRNA-dependent lipid II--L-alanine ligase	923,tRNA-dependent lipid II--L-alanine ligase	1407,tRNA-dependent lipid II--L-alanine ligase	448,tRNA-dependent lipid II--L-alanine ligase	1804,tRNA-dependent lipid II--L-alanine ligase	333,tRNA-dependent lipid II--L-alanine ligase	366,tRNA-dependent lipid II--L-alanine ligase	1119,tRNA-dependent lipid II--L-alanine ligase
1826,tRNA-dependent lipid II-Ala--L-alanine ligase	1909,tRNA-dependent lipid II-Ala--L-alanine ligase	451,tRNA-dependent lipid II-Ala--L-alanine ligase	207,tRNA-dependent lipid II-Ala--L-alanine ligase	158,tRNA-dependent lipid II-Ala--L-alanine ligase	1533,tRNA-dependent lipid II-Ala--L-alanine ligase	72,tRNA-dependent lipid II-Ala--L-alanine ligase	294,tRNA-dependent lipid II-Ala--L-alanine ligase	180,tRNA-dependent lipid II-Ala--L-alanine ligase	138,tRNA-dependent lipid II-Ala--L-alanine ligase	323,tRNA-dependent lipid II-Ala--L-alanine ligase	179,tRNA-dependent lipid II-Ala--L-alanine ligase	175,tRNA-dependent lipid II-Ala--L-alanine ligase	922,tRNA-dependent lipid II-Ala--L-alanine ligase	1408,tRNA-dependent lipid II-Ala--L-alanine ligase	447,tRNA-dependent lipid II-Ala--L-alanine ligase	1803,tRNA-dependent lipid II-Ala--L-alanine ligase	334,tRNA-dependent lipid II-Ala--L-alanine ligase	365,tRNA-dependent lipid II-Ala--L-alanine ligase	1118,tRNA-dependent lipid II-Ala--L-alanine ligase
1827,Triosephosphate isomerase	1908,Triosephosphate isomerase	452,Triosephosphate isomerase	208,Triosephosphate isomerase	159,Triosephosphate isomerase	1534,Triosephosphate isomerase	71,Triosephosphate isomerase	293,Triosephosphate isomerase	179,Triosephosphate isomerase	139,Triosephosphate isomerase	322,Triosephosphate isomerase	178,Triosephosphate isomerase	174,Triosephosphate isomerase	921,Triosephosphate isomerase	1409,Triosephosphate isomerase	446,Triosephosphate isomerase	1802,Triosephosphate isomerase	335,Triosephosphate isomerase	364,Triosephosphate isomerase	1117,Triosephosphate isomerase
1828,Immunoglobulin G-endopeptidase (IdeS) / Mac/ Secreted immunoglobulin binding protein (Sib38)	1907,Immunoglobulin G-endopeptidase (IdeS) / Mac/ Secreted immunoglobulin binding protein (Sib38)	454,Immunoglobulin G-endopeptidase (IdeS) / Mac/ Secreted immunoglobulin binding protein (Sib38)	209,Immunoglobulin G-endopeptidase (IdeS) / Mac/ Secreted immunoglobulin binding protein (Sib38)	160,Immunoglobulin G-endopeptidase (IdeS) / Mac/ Secreted immunoglobulin binding protein (Sib38)	1536,Immunoglobulin G-endopeptidase (IdeS) / Mac/ Secreted immunoglobulin binding protein (Sib38)	70,Immunoglobulin G-endopeptidase (IdeS) / Mac/ Secreted immunoglobulin binding protein (Sib38)	291,Immunoglobulin G-endopeptidase (IdeS) / Mac/ Secreted immunoglobulin binding protein (Sib38)	177,Immunoglobulin G-endopeptidase (IdeS) / Mac/ Secreted immunoglobulin binding protein (Sib38)	141,Immunoglobulin G-endopeptidase (IdeS) / Mac/ Secreted immunoglobulin binding protein (Sib38)	320,Immunoglobulin G-endopeptidase (IdeS) / Mac/ Secreted immunoglobulin binding protein (Sib38)	177,Immunoglobulin G-endopeptidase (IdeS) / Mac/ Secreted immunoglobulin binding protein (Sib38)	172,Immunoglobulin G-endopeptidase (IdeS) / Mac/ Secreted immunoglobulin binding protein (Sib38)	920,Immunoglobulin G-endopeptidase (IdeS) / Mac/ Secreted immunoglobulin binding protein (Sib38)	1410,Immunoglobulin G-endopeptidase (IdeS) / Mac/ Secreted immunoglobulin binding protein (Sib38)	445,Immunoglobulin G-endopeptidase (IdeS) / Mac/ Secreted immunoglobulin binding protein (Sib38)	1801,Immunoglobulin G-endopeptidase (IdeS) / Mac/ Secreted immunoglobulin binding protein (Sib38)	336,Immunoglobulin G-endopeptidase (IdeS) / Mac/ Secreted immunoglobulin binding protein (Sib38)	363,Immunoglobulin G-endopeptidase (IdeS) / Mac/ Secreted immunoglobulin binding protein (Sib38)	1116,Immunoglobulin G-endopeptidase (IdeS) / Mac/ Secreted immunoglobulin binding protein (Sib38)
1829,Translation elongation factor Tu	1906,Translation elongation factor Tu	455,Translation elongation factor Tu	210,Translation elongation factor Tu	161,Translation elongation factor Tu	1538,Translation elongation factor Tu	68,Translation elongation factor Tu	290,Translation elongation factor Tu	176,Translation elongation factor Tu	142,Translation elongation factor Tu	319,Translation elongation factor Tu	175,Translation elongation factor Tu	171,Translation elongation factor Tu	919,Translation elongation factor Tu	1411,Translation elongation factor Tu	444,Translation elongation factor Tu	1800,Translation elongation factor Tu	338,Translation elongation factor Tu	362,Translation elongation factor Tu	1775,Translation elongation factor Tu
1830,Cell division protein FtsW	1905,Cell division protein FtsW	457,Cell division protein FtsW	211,Cell division protein FtsW	162,Cell division protein FtsW	1539,Cell division protein FtsW	67,Cell division protein FtsW	289,Cell division protein FtsW	175,Cell division protein FtsW	143,Cell division protein FtsW	1371,Cell division protein FtsW	174,Cell division protein FtsW	170,Cell division protein FtsW	917,Cell division protein FtsW	1412,Cell division protein FtsW	442,Cell division protein FtsW	1799,Cell division protein FtsW	339,Cell division protein FtsW	361,Cell division protein FtsW	1776,Cell division protein FtsW
1831,Phosphoenolpyruvate carboxylase	1904,Phosphoenolpyruvate carboxylase	458,Phosphoenolpyruvate carboxylase	212,Phosphoenolpyruvate carboxylase	163,Phosphoenolpyruvate carboxylase	1540,Phosphoenolpyruvate carboxylase	66,Phosphoenolpyruvate carboxylase	288,Phosphoenolpyruvate carboxylase	174,Phosphoenolpyruvate carboxylase	144,Phosphoenolpyruvate carboxylase	1372,Phosphoenolpyruvate carboxylase	173,Phosphoenolpyruvate carboxylase	169,Phosphoenolpyruvate carboxylase	916,Phosphoenolpyruvate carboxylase	1413,Phosphoenolpyruvate carboxylase	441,Phosphoenolpyruvate carboxylase	1798,Phosphoenolpyruvate carboxylase	340,Phosphoenolpyruvate carboxylase	360,Phosphoenolpyruvate carboxylase	1777,Phosphoenolpyruvate carboxylase
1832,Oligoendopeptidase F	1903,Oligoendopeptidase F	459,Oligoendopeptidase F	213,Oligoendopeptidase F	164,Oligoendopeptidase F	1541,Oligoendopeptidase F	65,Oligoendopeptidase F	287,Oligoendopeptidase F	173,Oligoendopeptidase F	145,Oligoendopeptidase F	1373,Oligoendopeptidase F	172,Oligoendopeptidase F	168,Oligoendopeptidase F	915,Oligoendopeptidase F	1414,Oligoendopeptidase F	440,Oligoendopeptidase F	1797,Oligoendopeptidase F	341,Oligoendopeptidase F	359,Oligoendopeptidase F	1778,Oligoendopeptidase F
1833,Glutathione peroxidase family protein	1902,Glutathione peroxidase family protein	460,Glutathione peroxidase family protein	214,Glutathione peroxidase family protein	165,Glutathione peroxidase family protein	1542,Glutathione peroxidase family protein	64,Glutathione peroxidase family protein	286,Glutathione peroxidase family protein	172,Glutathione peroxidase family protein	146,Glutathione peroxidase family protein	1374,Glutathione peroxidase family protein	171,Glutathione peroxidase family protein	167,Glutathione peroxidase family protein	914,Glutathione peroxidase family protein	1415,Glutathione peroxidase family protein	439,Glutathione peroxidase family protein	1796,Glutathione peroxidase family protein	342,Glutathione peroxidase family protein	358,Glutathione peroxidase family protein	1779,Glutathione peroxidase family protein
1834,Substrate-specific component CbrT of predicted cobalamin ECF transporter	1901,Substrate-specific component CbrT of predicted cobalamin ECF transporter	859,Substrate-specific component CbrT of predicted cobalamin ECF transporter	215,Substrate-specific component CbrT of predicted cobalamin ECF transporter	166,Substrate-specific component CbrT of predicted cobalamin ECF transporter	1543,Substrate-specific component CbrT of predicted cobalamin ECF transporter	63,Substrate-specific component CbrT of predicted cobalamin ECF transporter	1397,Substrate-specific component CbrT of predicted cobalamin ECF transporter	1514,Substrate-specific component CbrT of predicted cobalamin ECF transporter	1379,Substrate-specific component CbrT of predicted cobalamin ECF transporter	1381,Substrate-specific component CbrT of predicted cobalamin ECF transporter	170,Substrate-specific component CbrT of predicted cobalamin ECF transporter	1381,Substrate-specific component CbrT of predicted cobalamin ECF transporter	913,Substrate-specific component CbrT of predicted cobalamin ECF transporter	1416,Substrate-specific component CbrT of predicted cobalamin ECF transporter	438,Substrate-specific component CbrT of predicted cobalamin ECF transporter	1795,Substrate-specific component CbrT of predicted cobalamin ECF transporter	343,Substrate-specific component CbrT of predicted cobalamin ECF transporter	357,Substrate-specific component CbrT of predicted cobalamin ECF transporter	1780,Substrate-specific component CbrT of predicted cobalamin ECF transporter
1835,Phage lysin, glycosyl hydrolase, family 25	1900,Phage lysin, glycosyl hydrolase, family 25	858,Phage lysin, glycosyl hydrolase, family 25	216,Phage lysin, glycosyl hydrolase, family 25	167,Phage lysin, glycosyl hydrolase, family 25	1544,Phage lysin, glycosyl hydrolase, family 25	62,Phage lysin, glycosyl hydrolase, family 25	1398,Phage lysin, glycosyl hydrolase, family 25	1515,Phage lysin, glycosyl hydrolase, family 25	1378,Phage lysin, glycosyl hydrolase, family 25	1380,Phage lysin, glycosyl hydrolase, family 25	169,Phage lysin, glycosyl hydrolase, family 25	1380,Phage lysin, glycosyl hydrolase, family 25	912,Phage lysin, glycosyl hydrolase, family 25	1417,Phage lysin, glycosyl hydrolase, family 25	437,Phage lysin, glycosyl hydrolase, family 25	1794,Phage lysin, glycosyl hydrolase, family 25	344,Phage lysin, glycosyl hydrolase, family 25	356,Phage lysin, glycosyl hydrolase, family 25	1781,Phage lysin, glycosyl hydrolase, family 25
1836,hypothetical protein	1899,hypothetical protein	- , -	- , -	- , -	- , -	- , -	- , -	- , -	- , -	- , -	- , -	- , -	- , -	1418,hypothetical protein	- , -	1793,hypothetical protein	- , -	- , -	- , -
1837,hypothetical protein	- , -	- , -	217,hypothetical protein	168,hypothetical protein	1545,hypothetical protein	- , -	1399,hypothetical protein	- , -	1377,hypothetical protein	1379,hypothetical protein	168,hypothetical protein	- , -	- , -	1419,hypothetical protein	- , -	1792,hypothetical protein	345,hypothetical protein	355,hypothetical protein	- , -
1838,Substrate-specific component ThiT of thiamin ECF transporter	1898,Substrate-specific component ThiT of thiamin ECF transporter	857,Substrate-specific component ThiT of thiamin ECF transporter	218,Substrate-specific component ThiT of thiamin ECF transporter	169,Substrate-specific component ThiT of thiamin ECF transporter	1546,Substrate-specific component ThiT of thiamin ECF transporter	118,Substrate-specific component ThiT of thiamin ECF transporter	1400,Substrate-specific component ThiT of thiamin ECF transporter	1516,Substrate-specific component ThiT of thiamin ECF transporter	1376,Substrate-specific component ThiT of thiamin ECF transporter	1378,Substrate-specific component ThiT of thiamin ECF transporter	167,Substrate-specific component ThiT of thiamin ECF transporter	1379,Substrate-specific component ThiT of thiamin ECF transporter	911,Substrate-specific component ThiT of thiamin ECF transporter	1420,Substrate-specific component ThiT of thiamin ECF transporter	436,Substrate-specific component ThiT of thiamin ECF transporter	1791,Substrate-specific component ThiT of thiamin ECF transporter	346,Substrate-specific component ThiT of thiamin ECF transporter	354,Substrate-specific component ThiT of thiamin ECF transporter	1783,Substrate-specific component ThiT of thiamin ECF transporter
1839,Transcriptional regulator	1897,Transcriptional regulator	856,Transcriptional regulator	219,Transcriptional regulator	170,Transcriptional regulator	1547,Transcriptional regulator	119,Transcriptional regulator	1401,Transcriptional regulator	1517,Transcriptional regulator	1375,Transcriptional regulator	1377,Transcriptional regulator	166,Transcriptional regulator	1378,Transcriptional regulator	910,Transcriptional regulator	1421,Transcriptional regulator	435,Transcriptional regulator	1790,Transcriptional regulator	347,Transcriptional regulator	353,Transcriptional regulator	1784,Transcriptional regulator
1840,Phosphoglycerate mutase family 5	1896,Phosphoglycerate mutase family 5	855,Phosphoglycerate mutase family 5	220,Phosphoglycerate mutase family 5	171,Phosphoglycerate mutase family 5	1548,Phosphoglycerate mutase family 5	120,Phosphoglycerate mutase family 5	1402,Phosphoglycerate mutase family 5	1518,Phosphoglycerate mutase family 5	1374,Phosphoglycerate mutase family 5	1376,Phosphoglycerate mutase family 5	165,Phosphoglycerate mutase family 5	1377,Phosphoglycerate mutase family 5	909,Phosphoglycerate mutase family 5	1422,Phosphoglycerate mutase family 5	434,Phosphoglycerate mutase family 5	1789,Phosphoglycerate mutase family 5	348,Phosphoglycerate mutase family 5	352,Phosphoglycerate mutase family 5	1785,Phosphoglycerate mutase family 5
1841,SLH, S-layer homology domain	1895,SLH, S-layer homology domain	854,SLH, S-layer homology domain	221,SLH, S-layer homology domain	172,SLH, S-layer homology domain	1549,SLH, S-layer homology domain	121,SLH, S-layer homology domain	1403,SLH, S-layer homology domain	1519,SLH, S-layer homology domain	1373,SLH, S-layer homology domain	1375,SLH, S-layer homology domain	164,SLH, S-layer homology domain	1376,SLH, S-layer homology domain	908,SLH, S-layer homology domain	1423,SLH, S-layer homology domain	433,SLH, S-layer homology domain	1788,SLH, S-layer homology domain	349,SLH, S-layer homology domain	351,SLH, S-layer homology domain	1786,SLH, S-layer homology domain
1842,hypothetical protein	1894,hypothetical protein	- , -	- , -	- , -	- , -	- , -	- , -	- , -	- , -	- , -	- , -	- , -	- , -	1424,hypothetical protein	- , -	1787,hypothetical protein	- , -	- , -	1787,hypothetical protein
1843,FIG01114239: hypothetical protein	1893,FIG01114239: hypothetical protein	- , -	222,FIG01114239: hypothetical protein	173,FIG01114239: hypothetical protein	1550,FIG01114239: hypothetical protein	122,FIG01114239: hypothetical protein	- , -	- , -	- , -	- , -	163,FIG01114239: hypothetical protein	- , -	907,FIG01114239: hypothetical protein	1425,FIG01114239: hypothetical protein	432,FIG01114239: hypothetical protein	1786,FIG01114239: hypothetical protein	350,FIG01114239: hypothetical protein	350,FIG01114239: hypothetical protein	1788,FIG01114239: hypothetical protein
1844,2-haloalkanoic acid dehalogenase	1892,2-haloalkanoic acid dehalogenase	701,2-haloalkanoic acid dehalogenase	223,2-haloalkanoic acid dehalogenase	174,2-haloalkanoic acid dehalogenase	1551,2-haloalkanoic acid dehalogenase	123,2-haloalkanoic acid dehalogenase	474,2-haloalkanoic acid dehalogenase	362,2-haloalkanoic acid dehalogenase	352,2-haloalkanoic acid dehalogenase	318,2-haloalkanoic acid dehalogenase	162,2-haloalkanoic acid dehalogenase	314,2-haloalkanoic acid dehalogenase	1947,2-haloalkanoic acid dehalogenase	1426,2-haloalkanoic acid dehalogenase	455,2-haloalkanoic acid dehalogenase	1785,2-haloalkanoic acid dehalogenase	351,2-haloalkanoic acid dehalogenase	349,2-haloalkanoic acid dehalogenase	1789,2-haloalkanoic acid dehalogenase
1845,Lysyl-tRNA synthetase (class II)	1891,Lysyl-tRNA synthetase (class II)	700,Lysyl-tRNA synthetase (class II)	224,Lysyl-tRNA synthetase (class II)	175,Lysyl-tRNA synthetase (class II)	1552,Lysyl-tRNA synthetase (class II)	124,Lysyl-tRNA synthetase (class II)	473,Lysyl-tRNA synthetase (class II)	361,Lysyl-tRNA synthetase (class II)	353,Lysyl-tRNA synthetase (class II)	317,Lysyl-tRNA synthetase (class II)	161,Lysyl-tRNA synthetase (class II)	315,Lysyl-tRNA synthetase (class II)	1946,Lysyl-tRNA synthetase (class II)	1427,Lysyl-tRNA synthetase (class II)	456,Lysyl-tRNA synthetase (class II)	1784,Lysyl-tRNA synthetase (class II)	352,Lysyl-tRNA synthetase (class II)	348,Lysyl-tRNA synthetase (class II)	1790,Lysyl-tRNA synthetase (class II)
1846,Transcriptional regulator, LuxR family	1890,Transcriptional regulator, LuxR family	699,Transcriptional regulator, LuxR family	225,Transcriptional regulator, LuxR family	176,Transcriptional regulator, LuxR family	1553,Transcriptional regulator, LuxR family	125,Transcriptional regulator, LuxR family	472,Transcriptional regulator, LuxR family	360,Transcriptional regulator, LuxR family	354,Transcriptional regulator, LuxR family	316,Transcriptional regulator, LuxR family	160,Transcriptional regulator, LuxR family	316,Transcriptional regulator, LuxR family	1945,Transcriptional regulator, LuxR family	1428,Transcriptional regulator, LuxR family	457,Transcriptional regulator, LuxR family	1783,Transcriptional regulator, LuxR family	353,Transcriptional regulator, LuxR family	347,Transcriptional regulator, LuxR family	1791,Transcriptional regulator, LuxR family
1847,Formiminoglutamase	1889,Formiminoglutamase	697,Formiminoglutamase	226,Formiminoglutamase	177,Formiminoglutamase	1554,Formiminoglutamase	126,Formiminoglutamase	470,Formiminoglutamase	358,Formiminoglutamase	356,Formiminoglutamase	314,Formiminoglutamase	159,Formiminoglutamase	318,Formiminoglutamase	1944,Formiminoglutamase	1429,Formiminoglutamase	458,Formiminoglutamase	1782,Formiminoglutamase	354,Formiminoglutamase	346,Formiminoglutamase	1792,Formiminoglutamase
1848,Dihydrofolate synthase / Folylpolyglutamate synthase	1888,Dihydrofolate synthase / Folylpolyglutamate synthase	696,Dihydrofolate synthase / Folylpolyglutamate synthase	227,Dihydrofolate synthase / Folylpolyglutamate synthase	178,Dihydrofolate synthase / Folylpolyglutamate synthase	1555,Dihydrofolate synthase / Folylpolyglutamate synthase	127,Dihydrofolate synthase / Folylpolyglutamate synthase	469,Dihydrofolate synthase / Folylpolyglutamate synthase	357,Dihydrofolate synthase / Folylpolyglutamate synthase	357,Dihydrofolate synthase / Folylpolyglutamate synthase	313,Dihydrofolate synthase / Folylpolyglutamate synthase	158,Dihydrofolate synthase / Folylpolyglutamate synthase	319,Dihydrofolate synthase / Folylpolyglutamate synthase	1943,Dihydrofolate synthase / Folylpolyglutamate synthase	1430,Dihydrofolate synthase / Folylpolyglutamate synthase	459,Dihydrofolate synthase / Folylpolyglutamate synthase	1781,Dihydrofolate synthase / Folylpolyglutamate synthase	355,Dihydrofolate synthase / Folylpolyglutamate synthase	345,Dihydrofolate synthase / Folylpolyglutamate synthase	1793,Dihydrofolate synthase / Folylpolyglutamate synthase
505,hypothetical protein	684,hypothetical protein	1740,hypothetical protein	1255,hypothetical protein	1042,hypothetical protein	- , -	1443,hypothetical protein	1934,hypothetical protein	1828,hypothetical protein	1794,hypothetical protein	1804,hypothetical protein	988,hypothetical protein	1795,hypothetical protein	- , -	833,hypothetical protein	- , -	969,hypothetical protein	1097,hypothetical protein	1089,hypothetical protein	981,hypothetical protein
506,Glycosyl transferase, family 8	685,Glycosyl transferase, family 8	1741,Glycosyl transferase, family 8	1254,Glycosyl transferase, family 8	1043,Glycosyl transferase, family 8	468,Glycosyl transferase, family 8	1444,Glycosyl transferase, family 8	1933,Glycosyl transferase, family 8	1829,Glycosyl transferase, family 8	1793,Glycosyl transferase, family 8	1803,Glycosyl transferase, family 8	987,Glycosyl transferase, family 8	1794,Glycosyl transferase, family 8	869,Glycosyl transferase, family 8	832,Glycosyl transferase, family 8	416,Glycosyl transferase, family 8	968,Glycosyl transferase, family 8	1096,Glycosyl transferase, family 8	1090,Glycosyl transferase, family 8	980,Glycosyl transferase, family 8
507,hypothetical protein	686,hypothetical protein	1742,hypothetical protein	1253,hypothetical protein	1044,hypothetical protein	467,hypothetical protein	1445,hypothetical protein	1932,hypothetical protein	1830,hypothetical protein	1792,hypothetical protein	1802,hypothetical protein	986,hypothetical protein	1793,hypothetical protein	868,hypothetical protein	831,hypothetical protein	417,hypothetical protein	967,hypothetical protein	1095,hypothetical protein	1091,hypothetical protein	979,hypothetical protein
508,Nucleotide sugar synthetase-like protein	687,Nucleotide sugar synthetase-like protein	1743,Nucleotide sugar synthetase-like protein	1252,Nucleotide sugar synthetase-like protein	1045,Nucleotide sugar synthetase-like protein	466,Nucleotide sugar synthetase-like protein	1446,Nucleotide sugar synthetase-like protein	1931,Nucleotide sugar synthetase-like protein	1831,Nucleotide sugar synthetase-like protein	1791,Nucleotide sugar synthetase-like protein	1801,Nucleotide sugar synthetase-like protein	985,Nucleotide sugar synthetase-like protein	1792,Nucleotide sugar synthetase-like protein	867,Nucleotide sugar synthetase-like protein	830,Nucleotide sugar synthetase-like protein	418,Nucleotide sugar synthetase-like protein	966,Nucleotide sugar synthetase-like protein	1094,Nucleotide sugar synthetase-like protein	1092,Nucleotide sugar synthetase-like protein	978,Nucleotide sugar synthetase-like protein
509,GftB: Glycosyl transferase, family 8	688,GftB: Glycosyl transferase, family 8	1744,GftB: Glycosyl transferase, family 8	1251,GftB: Glycosyl transferase, family 8	1046,GftB: Glycosyl transferase, family 8	465,GftB: Glycosyl transferase, family 8	1447,GftB: Glycosyl transferase, family 8	1930,GftB: Glycosyl transferase, family 8	1832,GftB: Glycosyl transferase, family 8	1790,GftB: Glycosyl transferase, family 8	1800,GftB: Glycosyl transferase, family 8	984,GftB: Glycosyl transferase, family 8	1791,GftB: Glycosyl transferase, family 8	866,GftB: Glycosyl transferase, family 8	829,GftB: Glycosyl transferase, family 8	419,GftB: Glycosyl transferase, family 8	965,GftB: Glycosyl transferase, family 8	1093,GftB: Glycosyl transferase, family 8	1093,GftB: Glycosyl transferase, family 8	977,GftB: Glycosyl transferase, family 8
510,Poly(glycerol-phosphate) alpha-glucosyltransferase GftA	689,Poly(glycerol-phosphate) alpha-glucosyltransferase GftA	1745,Poly(glycerol-phosphate) alpha-glucosyltransferase GftA	1250,Poly(glycerol-phosphate) alpha-glucosyltransferase GftA	1047,Poly(glycerol-phosphate) alpha-glucosyltransferase GftA	464,Poly(glycerol-phosphate) alpha-glucosyltransferase GftA	1448,Poly(glycerol-phosphate) alpha-glucosyltransferase GftA	1929,Poly(glycerol-phosphate) alpha-glucosyltransferase GftA	1833,Poly(glycerol-phosphate) alpha-glucosyltransferase GftA	1789,Poly(glycerol-phosphate) alpha-glucosyltransferase GftA	1799,Poly(glycerol-phosphate) alpha-glucosyltransferase GftA	983,Poly(glycerol-phosphate) alpha-glucosyltransferase GftA	1790,Poly(glycerol-phosphate) alpha-glucosyltransferase GftA	865,Poly(glycerol-phosphate) alpha-glucosyltransferase GftA	828,Poly(glycerol-phosphate) alpha-glucosyltransferase GftA	420,Poly(glycerol-phosphate) alpha-glucosyltransferase GftA	964,Poly(glycerol-phosphate) alpha-glucosyltransferase GftA	1092,Poly(glycerol-phosphate) alpha-glucosyltransferase GftA	1094,Poly(glycerol-phosphate) alpha-glucosyltransferase GftA	976,Poly(glycerol-phosphate) alpha-glucosyltransferase GftA
511,Protein export cytoplasm protein SecA2 ATPase RNA helicase (TC 3.A.5.1.1)	690,Protein export cytoplasm protein SecA2 ATPase RNA helicase (TC 3.A.5.1.1)	1746,Protein export cytoplasm protein SecA2 ATPase RNA helicase (TC 3.A.5.1.1)	1249,Protein export cytoplasm protein SecA2 ATPase RNA helicase (TC 3.A.5.1.1)	1048,Protein export cytoplasm protein SecA2 ATPase RNA helicase (TC 3.A.5.1.1)	463,Protein export cytoplasm protein SecA2 ATPase RNA helicase (TC 3.A.5.1.1)	1449,Protein export cytoplasm protein SecA2 ATPase RNA helicase (TC 3.A.5.1.1)	1928,Protein export cytoplasm protein SecA2 ATPase RNA helicase (TC 3.A.5.1.1)	1834,Protein export cytoplasm protein SecA2 ATPase RNA helicase (TC 3.A.5.1.1)	1788,Protein export cytoplasm protein SecA2 ATPase RNA helicase (TC 3.A.5.1.1)	1798,Protein export cytoplasm protein SecA2 ATPase RNA helicase (TC 3.A.5.1.1)	982,Protein export cytoplasm protein SecA2 ATPase RNA helicase (TC 3.A.5.1.1)	1789,Protein export cytoplasm protein SecA2 ATPase RNA helicase (TC 3.A.5.1.1)	864,Protein export cytoplasm protein SecA2 ATPase RNA helicase (TC 3.A.5.1.1)	827,Protein export cytoplasm protein SecA2 ATPase RNA helicase (TC 3.A.5.1.1)	421,Protein export cytoplasm protein SecA2 ATPase RNA helicase (TC 3.A.5.1.1)	963,Protein export cytoplasm protein SecA2 ATPase RNA helicase (TC 3.A.5.1.1)	1091,Protein export cytoplasm protein SecA2 ATPase RNA helicase (TC 3.A.5.1.1)	1095,Protein export cytoplasm protein SecA2 ATPase RNA helicase (TC 3.A.5.1.1)	975,Protein export cytoplasm protein SecA2 ATPase RNA helicase (TC 3.A.5.1.1)
512,Accessory secretory protein Asp3	692,hypothetical protein	1747,Accessory secretory protein Asp3	1248,Accessory secretory protein Asp3	1049,Accessory secretory protein Asp3	462,Accessory secretory protein Asp3	1450,Accessory secretory protein Asp3	1927,Accessory secretory protein Asp3	1835,Accessory secretory protein Asp3	1787,Accessory secretory protein Asp3	1797,Accessory secretory protein Asp3	981,Accessory secretory protein Asp3	1788,Accessory secretory protein Asp3	863,Accessory secretory protein Asp3	826,Accessory secretory protein Asp3	422,Accessory secretory protein Asp3	962,Accessory secretory protein Asp3	1090,Accessory secretory protein Asp3	1096,Accessory secretory protein Asp3	974,Accessory secretory protein Asp3
513,Accessory secretory protein Asp2	693,Accessory secretory protein Asp2	1748,Accessory secretory protein Asp2	1247,Accessory secretory protein Asp2	1050,Accessory secretory protein Asp2	461,Accessory secretory protein Asp2	1451,Accessory secretory protein Asp2	1926,Accessory secretory protein Asp2	1836,Accessory secretory protein Asp2	1786,Accessory secretory protein Asp2	1796,Accessory secretory protein Asp2	980,Accessory secretory protein Asp2	1787,Accessory secretory protein Asp2	862,Accessory secretory protein Asp2	825,Accessory secretory protein Asp2	423,Accessory secretory protein Asp2	961,Accessory secretory protein Asp2	1089,Accessory secretory protein Asp2	1097,Accessory secretory protein Asp2	973,Accessory secretory protein Asp2
514,Accessory secretory protein Asp1	694,Accessory secretory protein Asp1	1749,Accessory secretory protein Asp1	1246,Accessory secretory protein Asp1	1051,Accessory secretory protein Asp1	460,Accessory secretory protein Asp1	1452,Accessory secretory protein Asp1	1925,Accessory secretory protein Asp1	1837,Accessory secretory protein Asp1	1785,Accessory secretory protein Asp1	1795,Accessory secretory protein Asp1	979,Accessory secretory protein Asp1	1786,Accessory secretory protein Asp1	861,Accessory secretory protein Asp1	824,Accessory secretory protein Asp1	424,Accessory secretory protein Asp1	960,Accessory secretory protein Asp1	1088,Accessory secretory protein Asp1	1098,Accessory secretory protein Asp1	972,Accessory secretory protein Asp1
515,Preprotein translocase secY subunit (TC 3.A.5.1.1)	695,Preprotein translocase secY subunit (TC 3.A.5.1.1)	1750,Preprotein translocase secY subunit (TC 3.A.5.1.1)	1245,Preprotein translocase secY subunit (TC 3.A.5.1.1)	1052,Preprotein translocase secY subunit (TC 3.A.5.1.1)	459,Preprotein translocase secY subunit (TC 3.A.5.1.1)	1453,Preprotein translocase secY subunit (TC 3.A.5.1.1)	1924,Preprotein translocase secY subunit (TC 3.A.5.1.1)	1838,Preprotein translocase secY subunit (TC 3.A.5.1.1)	1784,Preprotein translocase secY subunit (TC 3.A.5.1.1)	1794,Preprotein translocase secY subunit (TC 3.A.5.1.1)	978,Preprotein translocase secY subunit (TC 3.A.5.1.1)	1785,Preprotein translocase secY subunit (TC 3.A.5.1.1)	860,Preprotein translocase secY subunit (TC 3.A.5.1.1)	823,Preprotein translocase secY subunit (TC 3.A.5.1.1)	425,Preprotein translocase secY subunit (TC 3.A.5.1.1)	959,Preprotein translocase secY subunit (TC 3.A.5.1.1)	1086,Preprotein translocase secY subunit (TC 3.A.5.1.1)	1100,Preprotein translocase secY subunit (TC 3.A.5.1.1)	971,Preprotein translocase secY subunit (TC 3.A.5.1.1)
516,Predicted cell-wall-anchored protein SasA (LPXTG motif)	696,Predicted cell-wall-anchored protein SasA (LPXTG motif)	1752,hypothetical protein	1244,Predicted cell-wall-anchored protein SasA (LPXTG motif)	1055,hypothetical protein	458,hypothetical protein	1454,Predicted cell-wall-anchored protein SasA (LPXTG motif)	1922,hypothetical protein	1840,hypothetical protein	1782,hypothetical protein	1792,hypothetical protein	976,Predicted cell-wall-anchored protein SasA (LPXTG motif)	1783,hypothetical protein	859,hypothetical protein	822,Predicted cell-wall-anchored protein SasA (LPXTG motif)	426,hypothetical protein	- , -	1084,Predicted cell-wall-anchored protein SasA (LPXTG motif)	1102,hypothetical protein	- , -
517,Transcriptional regulator, RofA	697,Transcriptional regulator, RofA	1753,Transcriptional regulator, RofA	1243,Transcriptional regulator, RofA	1056,Transcriptional regulator, RofA	457,Transcriptional regulator, RofA	1455,Transcriptional regulator, RofA	1921,Transcriptional regulator, RofA	1841,Transcriptional regulator, RofA	1781,Transcriptional regulator, RofA	1791,Transcriptional regulator, RofA	975,Transcriptional regulator, RofA	1782,Transcriptional regulator, RofA	858,Transcriptional regulator, RofA	820,Transcriptional regulator, RofA	427,Transcriptional regulator, RofA	1260,Transcriptional regulator, RofA	1083,Transcriptional regulator, RofA	1103,Transcriptional regulator, RofA	153,Transcriptional regulator, RofA
518,hypothetical protein	698,hypothetical protein	1756,hypothetical protein	1241,hypothetical protein	1058,hypothetical protein	455,hypothetical protein	1456,hypothetical protein	1918,hypothetical protein	1843,hypothetical protein	1779,hypothetical protein	1789,hypothetical protein	974,hypothetical protein	1780,hypothetical protein	- , -	819,hypothetical protein	- , -	1261,hypothetical protein	1081,hypothetical protein	1105,hypothetical protein	- , -
519,Phage transcriptional repressor	699,Phage transcriptional repressor	1757,Phage transcriptional repressor	1240,Phage transcriptional repressor	1059,Phage transcriptional repressor	454,Phage transcriptional repressor	1457,Phage transcriptional repressor	1917,Phage transcriptional repressor	1844,Phage transcriptional repressor	1778,Phage transcriptional repressor	1788,Phage transcriptional repressor	973,Phage transcriptional repressor	1779,Phage transcriptional repressor	- , -	818,Phage transcriptional repressor	- , -	1262,Phage transcriptional repressor	1080,Phage transcriptional repressor	1106,Phage transcriptional repressor	- , -
520,hypothetical protein	700,hypothetical protein	1758,hypothetical protein	1239,FIG01115240: hypothetical protein	1060,FIG01115240: hypothetical protein	453,hypothetical protein	1458,hypothetical protein	1916,hypothetical protein	1845,hypothetical protein	1777,hypothetical protein	1787,hypothetical protein	972,FIG01115240: hypothetical protein	1778,hypothetical protein	- , -	817,hypothetical protein	- , -	1263,hypothetical protein	1079,FIG01115240: hypothetical protein	1107,FIG01115240: hypothetical protein	- , -
521,5-formyltetrahydrofolate cyclo-ligase	701,5-formyltetrahydrofolate cyclo-ligase	1761,5-formyltetrahydrofolate cyclo-ligase	1237,5-formyltetrahydrofolate cyclo-ligase	1062,5-formyltetrahydrofolate cyclo-ligase	451,5-formyltetrahydrofolate cyclo-ligase	1459,5-formyltetrahydrofolate cyclo-ligase	1912,5-formyltetrahydrofolate cyclo-ligase	1848,5-formyltetrahydrofolate cyclo-ligase	1774,5-formyltetrahydrofolate cyclo-ligase	1784,5-formyltetrahydrofolate cyclo-ligase	971,5-formyltetrahydrofolate cyclo-ligase	1775,5-formyltetrahydrofolate cyclo-ligase	857,5-formyltetrahydrofolate cyclo-ligase	816,5-formyltetrahydrofolate cyclo-ligase	428,5-formyltetrahydrofolate cyclo-ligase	1264,5-formyltetrahydrofolate cyclo-ligase	1077,5-formyltetrahydrofolate cyclo-ligase	1109,5-formyltetrahydrofolate cyclo-ligase	151,5-formyltetrahydrofolate cyclo-ligase
522,GlpG protein (membrane protein of glp regulon)	702,GlpG protein (membrane protein of glp regulon)	1762,GlpG protein (membrane protein of glp regulon)	1236,GlpG protein (membrane protein of glp regulon)	1063,GlpG protein (membrane protein of glp regulon)	450,GlpG protein (membrane protein of glp regulon)	1460,GlpG protein (membrane protein of glp regulon)	1911,GlpG protein (membrane protein of glp regulon)	1849,GlpG protein (membrane protein of glp regulon)	1773,GlpG protein (membrane protein of glp regulon)	1783,GlpG protein (membrane protein of glp regulon)	970,GlpG protein (membrane protein of glp regulon)	1774,GlpG protein (membrane protein of glp regulon)	856,GlpG protein (membrane protein of glp regulon)	815,GlpG protein (membrane protein of glp regulon)	429,GlpG protein (membrane protein of glp regulon)	1265,GlpG protein (membrane protein of glp regulon)	1076,GlpG protein (membrane protein of glp regulon)	1110,GlpG protein (membrane protein of glp regulon)	150,GlpG protein (membrane protein of glp regulon)
523,UTP--glucose-1-phosphate uridylyltransferase	703,UTP--glucose-1-phosphate uridylyltransferase	1763,UTP--glucose-1-phosphate uridylyltransferase	1235,UTP--glucose-1-phosphate uridylyltransferase	1064,UTP--glucose-1-phosphate uridylyltransferase	449,UTP--glucose-1-phosphate uridylyltransferase	1461,UTP--glucose-1-phosphate uridylyltransferase	1910,UTP--glucose-1-phosphate uridylyltransferase	1850,UTP--glucose-1-phosphate uridylyltransferase	1772,UTP--glucose-1-phosphate uridylyltransferase	1782,UTP--glucose-1-phosphate uridylyltransferase	969,UTP--glucose-1-phosphate uridylyltransferase	1773,UTP--glucose-1-phosphate uridylyltransferase	855,UTP--glucose-1-phosphate uridylyltransferase	814,UTP--glucose-1-phosphate uridylyltransferase	430,UTP--glucose-1-phosphate uridylyltransferase	1266,UTP--glucose-1-phosphate uridylyltransferase	1075,UTP--glucose-1-phosphate uridylyltransferase	1111,UTP--glucose-1-phosphate uridylyltransferase	149,UTP--glucose-1-phosphate uridylyltransferase
524,Glycerol-3-phosphate dehydrogenase [NAD(P)+]	704,Glycerol-3-phosphate dehydrogenase [NAD(P)+]	1764,Glycerol-3-phosphate dehydrogenase [NAD(P)+]	1234,Glycerol-3-phosphate dehydrogenase [NAD(P)+]	1065,Glycerol-3-phosphate dehydrogenase [NAD(P)+]	448,Glycerol-3-phosphate dehydrogenase [NAD(P)+]	1462,Glycerol-3-phosphate dehydrogenase [NAD(P)+]	1909,Glycerol-3-phosphate dehydrogenase [NAD(P)+]	1851,Glycerol-3-phosphate dehydrogenase [NAD(P)+]	1771,Glycerol-3-phosphate dehydrogenase [NAD(P)+]	1781,Glycerol-3-phosphate dehydrogenase [NAD(P)+]	968,Glycerol-3-phosphate dehydrogenase [NAD(P)+]	1772,Glycerol-3-phosphate dehydrogenase [NAD(P)+]	854,Glycerol-3-phosphate dehydrogenase [NAD(P)+]	813,Glycerol-3-phosphate dehydrogenase [NAD(P)+]	431,Glycerol-3-phosphate dehydrogenase [NAD(P)+]	1267,Glycerol-3-phosphate dehydrogenase [NAD(P)+]	1074,Glycerol-3-phosphate dehydrogenase [NAD(P)+]	1112,Glycerol-3-phosphate dehydrogenase [NAD(P)+]	148,Glycerol-3-phosphate dehydrogenase [NAD(P)+]
525,Transcriptional regulator, MarR family	705,Transcriptional regulator, MarR family	1765,Transcriptional regulator, MarR family	1233,Transcriptional regulator, MarR family	1066,Transcriptional regulator, MarR family	758,Transcriptional regulator, MarR family	1463,Transcriptional regulator, MarR family	1908,Transcriptional regulator, MarR family	1852,Transcriptional regulator, MarR family	1770,Transcriptional regulator, MarR family	1780,Transcriptional regulator, MarR family	967,Transcriptional regulator, MarR family	1771,Transcriptional regulator, MarR family	140,Transcriptional regulator, MarR family	812,Transcriptional regulator, MarR family	1591,Transcriptional regulator, MarR family	1268,Transcriptional regulator, MarR family	1073,Transcriptional regulator, MarR family	1113,Transcriptional regulator, MarR family	147,Transcriptional regulator, MarR family
526,Lipid A export ATP-binding/permease protein MsbA	706,Lipid A export ATP-binding/permease protein MsbA	1766,Lipid A export ATP-binding/permease protein MsbA	1232,Lipid A export ATP-binding/permease protein MsbA	1067,Lipid A export ATP-binding/permease protein MsbA	759,Lipid A export ATP-binding/permease protein MsbA	1464,Lipid A export ATP-binding/permease protein MsbA	1907,Lipid A export ATP-binding/permease protein MsbA	1853,Lipid A export ATP-binding/permease protein MsbA	1769,Lipid A export ATP-binding/permease protein MsbA	1779,Lipid A export ATP-binding/permease protein MsbA	966,Lipid A export ATP-binding/permease protein MsbA	1770,Lipid A export ATP-binding/permease protein MsbA	141,Lipid A export ATP-binding/permease protein MsbA	811,Lipid A export ATP-binding/permease protein MsbA	1590,Lipid A export ATP-binding/permease protein MsbA	1269,Lipid A export ATP-binding/permease protein MsbA	1072,Lipid A export ATP-binding/permease protein MsbA	1114,Lipid A export ATP-binding/permease protein MsbA	146,Lipid A export ATP-binding/permease protein MsbA
527,Lipid A export ATP-binding/permease protein MsbA	708,Lipid A export ATP-binding/permease protein MsbA	1767,Lipid A export ATP-binding/permease protein MsbA	1231,Lipid A export ATP-binding/permease protein MsbA	1068,Lipid A export ATP-binding/permease protein MsbA	760,Lipid A export ATP-binding/permease protein MsbA	1465,Lipid A export ATP-binding/permease protein MsbA	1906,Lipid A export ATP-binding/permease protein MsbA	1854,Lipid A export ATP-binding/permease protein MsbA	1768,Lipid A export ATP-binding/permease protein MsbA	1778,Lipid A export ATP-binding/permease protein MsbA	965,Lipid A export ATP-binding/permease protein MsbA	1769,Lipid A export ATP-binding/permease protein MsbA	142,Lipid A export ATP-binding/permease protein MsbA	810,Lipid A export ATP-binding/permease protein MsbA	1589,Lipid A export ATP-binding/permease protein MsbA	1270,Lipid A export ATP-binding/permease protein MsbA	1071,Lipid A export ATP-binding/permease protein MsbA	1115,Lipid A export ATP-binding/permease protein MsbA	145,Lipid A export ATP-binding/permease protein MsbA
528,FIG053235: Diacylglucosamine hydrolase like	709,FIG053235: Diacylglucosamine hydrolase like	1768,FIG053235: Diacylglucosamine hydrolase like	1230,FIG053235: Diacylglucosamine hydrolase like	1069,FIG053235: Diacylglucosamine hydrolase like	761,FIG053235: Diacylglucosamine hydrolase like	1466,FIG053235: Diacylglucosamine hydrolase like	1905,FIG053235: Diacylglucosamine hydrolase like	1855,FIG053235: Diacylglucosamine hydrolase like	1767,FIG053235: Diacylglucosamine hydrolase like	1777,FIG053235: Diacylglucosamine hydrolase like	964,FIG053235: Diacylglucosamine hydrolase like	1768,FIG053235: Diacylglucosamine hydrolase like	143,FIG053235: Diacylglucosamine hydrolase like	809,FIG053235: Diacylglucosamine hydrolase like	1588,FIG053235: Diacylglucosamine hydrolase like	1271,FIG053235: Diacylglucosamine hydrolase like	1070,FIG053235: Diacylglucosamine hydrolase like	1116,FIG053235: Diacylglucosamine hydrolase like	144,FIG053235: Diacylglucosamine hydrolase like
529,Hypothetical protein DUF454	710,Hypothetical protein DUF454	1769,Hypothetical protein DUF454	1229,Hypothetical protein DUF454	1070,Hypothetical protein DUF454	762,Hypothetical protein DUF454	1467,Hypothetical protein DUF454	1904,Hypothetical protein DUF454	1856,Hypothetical protein DUF454	1766,Hypothetical protein DUF454	1776,Hypothetical protein DUF454	963,Hypothetical protein DUF454	1767,Hypothetical protein DUF454	144,Hypothetical protein DUF454	808,Hypothetical protein DUF454	1587,Hypothetical protein DUF454	1272,Hypothetical protein DUF454	1069,Hypothetical protein DUF454	1117,Hypothetical protein DUF454	143,hypothetical protein
530,Deoxyuridine 5-triphosphate nucleotidohydrolase	712,Deoxyuridine 5-triphosphate nucleotidohydrolase	1770,Deoxyuridine 5-triphosphate nucleotidohydrolase	1227,Deoxyuridine 5-triphosphate nucleotidohydrolase	1072,Deoxyuridine 5-triphosphate nucleotidohydrolase	764,Deoxyuridine 5-triphosphate nucleotidohydrolase	1469,Deoxyuridine 5-triphosphate nucleotidohydrolase	1902,Deoxyuridine 5-triphosphate nucleotidohydrolase	1858,Deoxyuridine 5-triphosphate nucleotidohydrolase	1764,Deoxyuridine 5-triphosphate nucleotidohydrolase	1774,Deoxyuridine 5-triphosphate nucleotidohydrolase	961,Deoxyuridine 5-triphosphate nucleotidohydrolase	1765,Deoxyuridine 5-triphosphate nucleotidohydrolase	146,Deoxyuridine 5-triphosphate nucleotidohydrolase	806,Deoxyuridine 5-triphosphate nucleotidohydrolase	1585,Deoxyuridine 5-triphosphate nucleotidohydrolase	1274,Deoxyuridine 5-triphosphate nucleotidohydrolase	1067,Deoxyuridine 5-triphosphate nucleotidohydrolase	1118,Deoxyuridine 5-triphosphate nucleotidohydrolase	141,Deoxyuridine 5-triphosphate nucleotidohydrolase
531,DNA repair protein RadA	713,DNA repair protein RadA	1771,DNA repair protein RadA	1226,DNA repair protein RadA	1073,DNA repair protein RadA	765,DNA repair protein RadA	1470,DNA repair protein RadA	1901,DNA repair protein RadA	1859,DNA repair protein RadA	1763,DNA repair protein RadA	1773,DNA repair protein RadA	960,DNA repair protein RadA	1764,DNA repair protein RadA	147,DNA repair protein RadA	805,DNA repair protein RadA	1584,DNA repair protein RadA	1275,DNA repair protein RadA	1066,DNA repair protein RadA	1119,DNA repair protein RadA	140,DNA repair protein RadA
532,Carbonic anhydrase	714,Carbonic anhydrase	1772,Carbonic anhydrase	1225,Carbonic anhydrase	1074,Carbonic anhydrase	766,Carbonic anhydrase	1471,Carbonic anhydrase	1900,Carbonic anhydrase	1860,Carbonic anhydrase	1762,Carbonic anhydrase	1772,Carbonic anhydrase	959,Carbonic anhydrase	1763,Carbonic anhydrase	148,Carbonic anhydrase	804,Carbonic anhydrase	1583,Carbonic anhydrase	1276,Carbonic anhydrase	1065,Carbonic anhydrase	1120,Carbonic anhydrase	139,Carbonic anhydrase
533,FIG01115027: hypothetical protein	715,FIG01115027: hypothetical protein	1773,FIG01115027: hypothetical protein	1224,FIG01115027: hypothetical protein	1075,FIG01115027: hypothetical protein	767,FIG01115027: hypothetical protein	1472,FIG01115027: hypothetical protein	1899,FIG01115027: hypothetical protein	1861,FIG01115027: hypothetical protein	1761,FIG01115027: hypothetical protein	1771,FIG01115027: hypothetical protein	958,FIG01115027: hypothetical protein	1762,FIG01115027: hypothetical protein	149,FIG01115027: hypothetical protein	803,FIG01115027: hypothetical protein	1582,FIG01115027: hypothetical protein	1277,FIG01115027: hypothetical protein	1064,FIG01115027: hypothetical protein	1121,FIG01115027: hypothetical protein	138,FIG01115027: hypothetical protein
534,Glutamyl-tRNA synthetase @ Glutamyl-tRNA(Gln) synthetase	717,Glutamyl-tRNA synthetase @ Glutamyl-tRNA(Gln) synthetase	1775,Glutamyl-tRNA synthetase @ Glutamyl-tRNA(Gln) synthetase	1222,Glutamyl-tRNA synthetase @ Glutamyl-tRNA(Gln) synthetase	1077,Glutamyl-tRNA synthetase @ Glutamyl-tRNA(Gln) synthetase	769,Glutamyl-tRNA synthetase @ Glutamyl-tRNA(Gln) synthetase	1474,Glutamyl-tRNA synthetase @ Glutamyl-tRNA(Gln) synthetase	1897,Glutamyl-tRNA synthetase @ Glutamyl-tRNA(Gln) synthetase	1863,Glutamyl-tRNA synthetase @ Glutamyl-tRNA(Gln) synthetase	1759,Glutamyl-tRNA synthetase @ Glutamyl-tRNA(Gln) synthetase	1769,Glutamyl-tRNA synthetase @ Glutamyl-tRNA(Gln) synthetase	956,Glutamyl-tRNA synthetase @ Glutamyl-tRNA(Gln) synthetase	1760,Glutamyl-tRNA synthetase @ Glutamyl-tRNA(Gln) synthetase	151,Glutamyl-tRNA synthetase @ Glutamyl-tRNA(Gln) synthetase	802,Glutamyl-tRNA synthetase @ Glutamyl-tRNA(Gln) synthetase	1580,Glutamyl-tRNA synthetase @ Glutamyl-tRNA(Gln) synthetase	1278,Glutamyl-tRNA synthetase @ Glutamyl-tRNA(Gln) synthetase	1062,Glutamyl-tRNA synthetase @ Glutamyl-tRNA(Gln) synthetase	1123,Glutamyl-tRNA synthetase @ Glutamyl-tRNA(Gln) synthetase	137,Glutamyl-tRNA synthetase @ Glutamyl-tRNA(Gln) synthetase
535,hypothetical protein	- , -	- , -	1221,hypothetical protein	1078,hypothetical protein	- , -	1475,hypothetical protein	- , -	- , -	- , -	- , -	955,hypothetical protein	- , -	152,hypothetical protein	801,hypothetical protein	1579,hypothetical protein	1279,hypothetical protein	1061,hypothetical protein	1124,hypothetical protein	136,hypothetical protein
536,Accessory gene regulator protein C	718,Accessory gene regulator protein C	1776,Accessory gene regulator protein C	1220,Histidine kinase of the competence regulon ComD	1079,Histidine kinase of the competence regulon ComD	770,Accessory gene regulator protein C	1476,Histidine kinase of the competence regulon ComD	1896,Accessory gene regulator protein C	1864,Accessory gene regulator protein C	1758,Accessory gene regulator protein C	1768,Accessory gene regulator protein C	954,Histidine kinase of the competence regulon ComD	1759,Accessory gene regulator protein C	153,Histidine kinase of the competence regulon ComD	800,Accessory gene regulator protein C	1578,Histidine kinase of the competence regulon ComD	1280,Accessory gene regulator protein C	1060,Histidine kinase of the competence regulon ComD	1125,Histidine kinase of the competence regulon ComD	135,Histidine kinase of the competence regulon ComD
537,Sensory transduction protein kinase	719,Sensory transduction protein kinase	1777,Sensory transduction protein kinase	1219,Sensory transduction protein kinase	1080,Sensory transduction protein kinase	771,Sensory transduction protein kinase	1477,Sensory transduction protein kinase	1895,Sensory transduction protein kinase	1865,Sensory transduction protein kinase	1757,Sensory transduction protein kinase	1767,Sensory transduction protein kinase	953,Sensory transduction protein kinase	1758,Sensory transduction protein kinase	154,Sensory transduction protein kinase	799,Sensory transduction protein kinase	1577,Sensory transduction protein kinase	1281,Sensory transduction protein kinase	1059,Sensory transduction protein kinase	1126,Sensory transduction protein kinase	134,Sensory transduction protein kinase
538,Response regulator of the competence regulon ComE	720,Response regulator of the competence regulon ComE	1778,Response regulator of the competence regulon ComE	1218,Response regulator of the competence regulon ComE	1081,Response regulator of the competence regulon ComE	772,Response regulator of the competence regulon ComE	1478,Response regulator of the competence regulon ComE	1894,Response regulator of the competence regulon ComE	1866,Response regulator of the competence regulon ComE	1756,Response regulator of the competence regulon ComE	1766,Response regulator of the competence regulon ComE	952,Response regulator of the competence regulon ComE	1757,Response regulator of the competence regulon ComE	155,Response regulator of the competence regulon ComE	798,Response regulator of the competence regulon ComE	1576,Response regulator of the competence regulon ComE	1282,Response regulator of the competence regulon ComE	1058,Response regulator of the competence regulon ComE	1127,Response regulator of the competence regulon ComE	133,Response regulator of the competence regulon ComE
539,Ribonuclease P protein component	721,Ribonuclease P protein component	1779,Ribonuclease P protein component	1217,Ribonuclease P protein component	1082,Ribonuclease P protein component	773,Ribonuclease P protein component	1479,Ribonuclease P protein component	1893,Ribonuclease P protein component	1867,Ribonuclease P protein component	1755,Ribonuclease P protein component	1765,Ribonuclease P protein component	951,Ribonuclease P protein component	1756,Ribonuclease P protein component	156,Ribonuclease P protein component	797,Ribonuclease P protein component	1575,Ribonuclease P protein component	1283,Ribonuclease P protein component	1057,Ribonuclease P protein component	1128,Ribonuclease P protein component	132,Ribonuclease P protein component
540,Inner membrane protein translocase component YidC, short form OxaI-like	722,Inner membrane protein translocase component YidC, short form OxaI-like	1780,Inner membrane protein translocase component YidC, short form OxaI-like	1216,Inner membrane protein translocase component YidC, short form OxaI-like	1083,Inner membrane protein translocase component YidC, short form OxaI-like	774,Inner membrane protein translocase component YidC, short form OxaI-like	1480,Inner membrane protein translocase component YidC, short form OxaI-like	1892,Inner membrane protein translocase component YidC, short form OxaI-like	1868,Inner membrane protein translocase component YidC, short form OxaI-like	1754,Inner membrane protein translocase component YidC, short form OxaI-like	1764,Inner membrane protein translocase component YidC, short form OxaI-like	950,Inner membrane protein translocase component YidC, short form OxaI-like	1755,Inner membrane protein translocase component YidC, short form OxaI-like	157,Inner membrane protein translocase component YidC, short form OxaI-like	796,Inner membrane protein translocase component YidC, short form OxaI-like	1574,Inner membrane protein translocase component YidC, short form OxaI-like	1284,Inner membrane protein translocase component YidC, short form OxaI-like	1056,Inner membrane protein translocase component YidC, short form OxaI-like	1129,Inner membrane protein translocase component YidC, short form OxaI-like	131,Inner membrane protein translocase component YidC, short form OxaI-like
541,RNA-binding protein Jag	723,RNA-binding protein Jag	1781,RNA-binding protein Jag	1215,RNA-binding protein Jag	1084,RNA-binding protein Jag	775,RNA-binding protein Jag	1481,RNA-binding protein Jag	1891,RNA-binding protein Jag	1869,RNA-binding protein Jag	1753,RNA-binding protein Jag	1763,RNA-binding protein Jag	949,RNA-binding protein Jag	1754,RNA-binding protein Jag	158,RNA-binding protein Jag	795,RNA-binding protein Jag	1573,RNA-binding protein Jag	1285,RNA-binding protein Jag	1055,RNA-binding protein Jag	1130,RNA-binding protein Jag	130,RNA-binding protein Jag
542,Manganese transport protein MntH	724,Manganese transport protein MntH	- , -	- , -	- , -	- , -	- , -	- , -	- , -	- , -	- , -	- , -	- , -	- , -	794,Manganese transport protein MntH	- , -	1286,Manganese transport protein MntH	- , -	- , -	- , -
543,Manganese transport protein MntH	725,Manganese transport protein MntH	1782,Manganese transport protein MntH	1213,Manganese transport protein MntH	1086,Manganese transport protein MntH	776,Manganese transport protein MntH	1482,Manganese transport protein MntH	1890,Manganese transport protein MntH	1870,Manganese transport protein MntH	1752,Manganese transport protein MntH	1762,Manganese transport protein MntH	947,Manganese transport protein MntH	1753,Manganese transport protein MntH	159,Manganese transport protein MntH	793,Manganese transport protein MntH	1572,Manganese transport protein MntH	1287,Manganese transport protein MntH	1053,Manganese transport protein MntH	1132,Manganese transport protein MntH	129,Manganese transport protein MntH
544,LSU ribosomal protein L34p	726,LSU ribosomal protein L34p	1783,LSU ribosomal protein L34p	1212,LSU ribosomal protein L34p	1087,LSU ribosomal protein L34p	777,LSU ribosomal protein L34p	1484,LSU ribosomal protein L34p	1889,LSU ribosomal protein L34p	1871,LSU ribosomal protein L34p	1751,LSU ribosomal protein L34p	1761,LSU ribosomal protein L34p	946,LSU ribosomal protein L34p	1752,LSU ribosomal protein L34p	160,LSU ribosomal protein L34p	792,LSU ribosomal protein L34p	1571,LSU ribosomal protein L34p	1288,LSU ribosomal protein L34p	1052,LSU ribosomal protein L34p	1133,LSU ribosomal protein L34p	128,LSU ribosomal protein L34p
545,hypothetical protein	727,hypothetical protein	1784,hypothetical protein	1211,hypothetical protein	1088,hypothetical protein	778,hypothetical protein	1485,hypothetical protein	1888,hypothetical protein	1872,hypothetical protein	1750,hypothetical protein	1760,hypothetical protein	945,hypothetical protein	1751,hypothetical protein	161,hypothetical protein	791,hypothetical protein	1570,hypothetical protein	1289,hypothetical protein	1051,hypothetical protein	1134,hypothetical protein	127,hypothetical protein
546,hypothetical protein	728,hypothetical protein	- , -	- , -	- , -	- , -	- , -	- , -	- , -	- , -	- , -	- , -	- , -	- , -	790,hypothetical protein	- , -	- , -	- , -	- , -	- , -
547,Transcriptional regulator, MarR family	729,Transcriptional regulator, MarR family	1785,Transcriptional regulator, MarR family	1210,Transcriptional regulator, MarR family	1089,Transcriptional regulator, MarR family	779,Transcriptional regulator, MarR family	1486,Transcriptional regulator, MarR family	1887,Transcriptional regulator, MarR family	1873,Transcriptional regulator, MarR family	1749,Transcriptional regulator, MarR family	1759,Transcriptional regulator, MarR family	944,Transcriptional regulator, MarR family	1750,Transcriptional regulator, MarR family	162,Transcriptional regulator, MarR family	789,Transcriptional regulator, MarR family	1569,Transcriptional regulator, MarR family	1290,Transcriptional regulator, MarR family	1050,Transcriptional regulator, MarR family	1135,Transcriptional regulator, MarR family	126,Transcriptional regulator, MarR family
548,Regulator of polyketide synthase expression	730,Regulator of polyketide synthase expression	1786,Regulator of polyketide synthase expression	1208,Regulator of polyketide synthase expression	1091,Regulator of polyketide synthase expression	781,Regulator of polyketide synthase expression	1488,Regulator of polyketide synthase expression	1886,Regulator of polyketide synthase expression	1874,Regulator of polyketide synthase expression	1748,Regulator of polyketide synthase expression	1758,Regulator of polyketide synthase expression	942,Regulator of polyketide synthase expression	1749,Regulator of polyketide synthase expression	164,Regulator of polyketide synthase expression	788,Regulator of polyketide synthase expression	1567,Regulator of polyketide synthase expression	1291,Regulator of polyketide synthase expression	1047,Regulator of polyketide synthase expression	1137,Regulator of polyketide synthase expression	123,Regulator of polyketide synthase expression
549,Ornithine carbamoyltransferase	731,Ornithine carbamoyltransferase	1787,Ornithine carbamoyltransferase	1207,Ornithine carbamoyltransferase	1092,Ornithine carbamoyltransferase	1801,Ornithine carbamoyltransferase	1489,Ornithine carbamoyltransferase	1885,Ornithine carbamoyltransferase	1875,Ornithine carbamoyltransferase	1747,Ornithine carbamoyltransferase	1757,Ornithine carbamoyltransferase	941,Ornithine carbamoyltransferase	1748,Ornithine carbamoyltransferase	165,Ornithine carbamoyltransferase	787,Ornithine carbamoyltransferase	1566,Ornithine carbamoyltransferase	1292,Ornithine carbamoyltransferase	1046,Ornithine carbamoyltransferase	1138,Ornithine carbamoyltransferase	122,Ornithine carbamoyltransferase
550,Arginine/ornithine antiporter ArcD	732,Arginine/ornithine antiporter ArcD	1788,Arginine/ornithine antiporter ArcD	1206,Arginine/ornithine antiporter ArcD	1093,Arginine/ornithine antiporter ArcD	1802,Arginine/ornithine antiporter ArcD	1490,Arginine/ornithine antiporter ArcD	1884,Arginine/ornithine antiporter ArcD	1876,Arginine/ornithine antiporter ArcD	1746,Arginine/ornithine antiporter ArcD	1756,Arginine/ornithine antiporter ArcD	940,Arginine/ornithine antiporter ArcD	1747,Arginine/ornithine antiporter ArcD	166,Arginine/ornithine antiporter ArcD	786,Arginine/ornithine antiporter ArcD	1565,Arginine/ornithine antiporter ArcD	1293,Arginine/ornithine antiporter ArcD	1045,Arginine/ornithine antiporter ArcD	1139,Arginine/ornithine antiporter ArcD	121,Arginine/ornithine antiporter ArcD
551,NG,NG-dimethylarginine dimethylaminohydrolase 1	733,NG,NG-dimethylarginine dimethylaminohydrolase 1	1789,NG,NG-dimethylarginine dimethylaminohydrolase 1	1205,NG,NG-dimethylarginine dimethylaminohydrolase 1	1094,NG,NG-dimethylarginine dimethylaminohydrolase 1	1803,NG,NG-dimethylarginine dimethylaminohydrolase 1	1491,NG,NG-dimethylarginine dimethylaminohydrolase 1	1883,NG,NG-dimethylarginine dimethylaminohydrolase 1	1877,NG,NG-dimethylarginine dimethylaminohydrolase 1	1745,NG,NG-dimethylarginine dimethylaminohydrolase 1	1755,NG,NG-dimethylarginine dimethylaminohydrolase 1	939,NG,NG-dimethylarginine dimethylaminohydrolase 1	1746,NG,NG-dimethylarginine dimethylaminohydrolase 1	167,NG,NG-dimethylarginine dimethylaminohydrolase 1	785,NG,NG-dimethylarginine dimethylaminohydrolase 1	1564,NG,NG-dimethylarginine dimethylaminohydrolase 1	1294,NG,NG-dimethylarginine dimethylaminohydrolase 1	1044,NG,NG-dimethylarginine dimethylaminohydrolase 1	1140,NG,NG-dimethylarginine dimethylaminohydrolase 1	120,NG,NG-dimethylarginine dimethylaminohydrolase 1
552,D-3-phosphoglycerate dehydrogenase	734,D-3-phosphoglycerate dehydrogenase	1790,D-3-phosphoglycerate dehydrogenase	1204,D-3-phosphoglycerate dehydrogenase	1095,D-3-phosphoglycerate dehydrogenase	1804,D-3-phosphoglycerate dehydrogenase	1492,D-3-phosphoglycerate dehydrogenase	1882,D-3-phosphoglycerate dehydrogenase	1878,D-3-phosphoglycerate dehydrogenase	1744,D-3-phosphoglycerate dehydrogenase	1754,D-3-phosphoglycerate dehydrogenase	938,D-3-phosphoglycerate dehydrogenase	1745,D-3-phosphoglycerate dehydrogenase	168,D-3-phosphoglycerate dehydrogenase	784,D-3-phosphoglycerate dehydrogenase	1563,D-3-phosphoglycerate dehydrogenase	1295,D-3-phosphoglycerate dehydrogenase	1043,D-3-phosphoglycerate dehydrogenase	1141,D-3-phosphoglycerate dehydrogenase	119,D-3-phosphoglycerate dehydrogenase
553,Putative deoxyribonuclease YcfH	735,Putative deoxyribonuclease YcfH	1791,Putative deoxyribonuclease YcfH	1203,Putative deoxyribonuclease YcfH	1096,Putative deoxyribonuclease YcfH	1805,Putative deoxyribonuclease YcfH	1493,Putative deoxyribonuclease YcfH	1881,Putative deoxyribonuclease YcfH	1879,Putative deoxyribonuclease YcfH	1743,Putative deoxyribonuclease YcfH	1753,Putative deoxyribonuclease YcfH	937,Putative deoxyribonuclease YcfH	1744,Putative deoxyribonuclease YcfH	169,Putative deoxyribonuclease YcfH	783,Putative deoxyribonuclease YcfH	1562,Putative deoxyribonuclease YcfH	1296,Putative deoxyribonuclease YcfH	1042,Putative deoxyribonuclease YcfH	1142,Putative deoxyribonuclease YcfH	118,Putative deoxyribonuclease YcfH
554,Ribonuclease M5	736,Ribonuclease M5	1792,Ribonuclease M5	1202,Ribonuclease M5	1097,Ribonuclease M5	1806,Ribonuclease M5	1494,Ribonuclease M5	1880,Ribonuclease M5	1880,Ribonuclease M5	1742,Ribonuclease M5	1752,Ribonuclease M5	936,Ribonuclease M5	1743,Ribonuclease M5	170,Ribonuclease M5	782,Ribonuclease M5	1561,Ribonuclease M5	1297,Ribonuclease M5	1041,Ribonuclease M5	1143,Ribonuclease M5	117,Ribonuclease M5
555,SSU rRNA (adenine(1518)-N(6)/adenine(1519)-N(6))- dimethyltransferase	737,SSU rRNA (adenine(1518)-N(6)/adenine(1519)-N(6))- dimethyltransferase	1793,SSU rRNA (adenine(1518)-N(6)/adenine(1519)-N(6))- dimethyltransferase	1201,SSU rRNA (adenine(1518)-N(6)/adenine(1519)-N(6))- dimethyltransferase	1098,SSU rRNA (adenine(1518)-N(6)/adenine(1519)-N(6))- dimethyltransferase	1807,SSU rRNA (adenine(1518)-N(6)/adenine(1519)-N(6))- dimethyltransferase	1495,SSU rRNA (adenine(1518)-N(6)/adenine(1519)-N(6))- dimethyltransferase	1879,SSU rRNA (adenine(1518)-N(6)/adenine(1519)-N(6))- dimethyltransferase	1881,SSU rRNA (adenine(1518)-N(6)/adenine(1519)-N(6))- dimethyltransferase	1741,SSU rRNA (adenine(1518)-N(6)/adenine(1519)-N(6))- dimethyltransferase	1751,SSU rRNA (adenine(1518)-N(6)/adenine(1519)-N(6))- dimethyltransferase	935,SSU rRNA (adenine(1518)-N(6)/adenine(1519)-N(6))- dimethyltransferase	1742,SSU rRNA (adenine(1518)-N(6)/adenine(1519)-N(6))- dimethyltransferase	173,SSU rRNA (adenine(1518)-N(6)/adenine(1519)-N(6))- dimethyltransferase	634,SSU rRNA (adenine(1518)-N(6)/adenine(1519)-N(6))- dimethyltransferase	1558,SSU rRNA (adenine(1518)-N(6)/adenine(1519)-N(6))- dimethyltransferase	1298,SSU rRNA (adenine(1518)-N(6)/adenine(1519)-N(6))- dimethyltransferase	1040,SSU rRNA (adenine(1518)-N(6)/adenine(1519)-N(6))- dimethyltransferase	1144,SSU rRNA (adenine(1518)-N(6)/adenine(1519)-N(6))- dimethyltransferase	116,SSU rRNA (adenine(1518)-N(6)/adenine(1519)-N(6))- dimethyltransferase
556,Phage tail fiber protein	738,Phage tail fiber protein	1794,Phage tail fiber protein	1200,Phage tail fiber protein	1099,Phage tail fiber protein	- , -	1496,Phage tail fiber protein	1878,Phage tail fiber protein	1882,Phage tail fiber protein	1740,Phage tail fiber protein	1750,Phage tail fiber protein	934,Phage tail fiber protein	1741,Phage tail fiber protein	174,Phage tail fiber protein	633,Phage tail fiber protein	1557,Phage tail fiber protein	1299,Phage tail fiber protein	1039,Phage tail fiber protein	1145,Phage tail fiber protein	114,Phage tail fiber protein
557,FIG01114800: hypothetical protein	739,FIG01114800: hypothetical protein	1795,FIG01114800: hypothetical protein	1199,FIG01114800: hypothetical protein	1100,FIG01114800: hypothetical protein	1810,FIG01114800: hypothetical protein	1497,FIG01114800: hypothetical protein	1104,FIG01114800: hypothetical protein	1159,FIG01114800: hypothetical protein	1066,FIG01114800: hypothetical protein	1107,FIG01114800: hypothetical protein	933,FIG01114800: hypothetical protein	1107,FIG01114800: hypothetical protein	175,FIG01114800: hypothetical protein	632,FIG01114800: hypothetical protein	1556,FIG01114800: hypothetical protein	1300,FIG01114800: hypothetical protein	1038,FIG01114800: hypothetical protein	1146,FIG01114800: hypothetical protein	112,FIG01114800: hypothetical protein
558,drug resistance transporter, EmrB/QacA family	740,drug resistance transporter, EmrB/QacA family	1796,drug resistance transporter, EmrB/QacA family	1198,drug resistance transporter, EmrB/QacA family	1101,drug resistance transporter, EmrB/QacA family	1811,drug resistance transporter, EmrB/QacA family	1498,drug resistance transporter, EmrB/QacA family	1105,drug resistance transporter, EmrB/QacA family	1158,drug resistance transporter, EmrB/QacA family	1067,drug resistance transporter, EmrB/QacA family	1108,drug resistance transporter, EmrB/QacA family	932,drug resistance transporter, EmrB/QacA family	1106,drug resistance transporter, EmrB/QacA family	176,drug resistance transporter, EmrB/QacA family	631,drug resistance transporter, EmrB/QacA family	1555,drug resistance transporter, EmrB/QacA family	1301,drug resistance transporter, EmrB/QacA family	1037,drug resistance transporter, EmrB/QacA family	1147,drug resistance transporter, EmrB/QacA family	111,drug resistance transporter, EmrB/QacA family
559,hypothetical protein	741,hypothetical protein	1797,hypothetical protein	1197,hypothetical protein	1102,hypothetical protein	1812,hypothetical protein	1500,hypothetical protein	1106,hypothetical protein	1157,hypothetical protein	1068,hypothetical protein	1109,hypothetical protein	931,hypothetical protein	1105,hypothetical protein	177,hypothetical protein	630,hypothetical protein	1554,hypothetical protein	1302,hypothetical protein	1036,hypothetical protein	1148,hypothetical protein	110,hypothetical protein
560,hypothetical protein	742,hypothetical protein	1798,hypothetical protein	- , -	- , -	1813,hypothetical protein	- , -	1107,hypothetical protein	1156,hypothetical protein	1069,hypothetical protein	1110,hypothetical protein	- , -	1104,hypothetical protein	178,hypothetical protein	629,hypothetical protein	1553,hypothetical protein	1303,hypothetical protein	- , -	- , -	109,hypothetical protein
561,Ribosome small subunit-stimulated GTPase EngC	743,Ribosome small subunit-stimulated GTPase EngC	1799,Ribosome small subunit-stimulated GTPase EngC	1196,Ribosome small subunit-stimulated GTPase EngC	1103,Ribosome small subunit-stimulated GTPase EngC	1814,Ribosome small subunit-stimulated GTPase EngC	1501,Ribosome small subunit-stimulated GTPase EngC	1108,Ribosome small subunit-stimulated GTPase EngC	1155,Ribosome small subunit-stimulated GTPase EngC	1070,Ribosome small subunit-stimulated GTPase EngC	1111,Ribosome small subunit-stimulated GTPase EngC	930,Ribosome small subunit-stimulated GTPase EngC	1103,Ribosome small subunit-stimulated GTPase EngC	179,Ribosome small subunit-stimulated GTPase EngC	628,Ribosome small subunit-stimulated GTPase EngC	1552,Ribosome small subunit-stimulated GTPase EngC	1304,Ribosome small subunit-stimulated GTPase EngC	1035,Ribosome small subunit-stimulated GTPase EngC	1149,Ribosome small subunit-stimulated GTPase EngC	108,Ribosome small subunit-stimulated GTPase EngC
562,Ribulose-phosphate 3-epimerase	744,Ribulose-phosphate 3-epimerase	1800,Ribulose-phosphate 3-epimerase	1195,Ribulose-phosphate 3-epimerase	1104,Ribulose-phosphate 3-epimerase	1815,Ribulose-phosphate 3-epimerase	1502,Ribulose-phosphate 3-epimerase	1109,Ribulose-phosphate 3-epimerase	1154,Ribulose-phosphate 3-epimerase	1071,Ribulose-phosphate 3-epimerase	1112,Ribulose-phosphate 3-epimerase	929,Ribulose-phosphate 3-epimerase	1102,Ribulose-phosphate 3-epimerase	180,Ribulose-phosphate 3-epimerase	627,Ribulose-phosphate 3-epimerase	1551,Ribulose-phosphate 3-epimerase	1305,Ribulose-phosphate 3-epimerase	1034,Ribulose-phosphate 3-epimerase	1150,Ribulose-phosphate 3-epimerase	107,Ribulose-phosphate 3-epimerase
563,Thiamin pyrophosphokinase	745,Thiamin pyrophosphokinase	1801,Thiamin pyrophosphokinase	1194,Thiamin pyrophosphokinase	1105,Thiamin pyrophosphokinase	1816,Thiamin pyrophosphokinase	1503,Thiamin pyrophosphokinase	1110,Thiamin pyrophosphokinase	1153,Thiamin pyrophosphokinase	1072,Thiamin pyrophosphokinase	1113,Thiamin pyrophosphokinase	928,Thiamin pyrophosphokinase	1101,Thiamin pyrophosphokinase	181,Thiamin pyrophosphokinase	626,Thiamin pyrophosphokinase	1550,Thiamin pyrophosphokinase	1306,Thiamin pyrophosphokinase	1033,Thiamin pyrophosphokinase	1151,Thiamin pyrophosphokinase	106,Thiamin pyrophosphokinase
564,DNA recombination protein RmuC	746,DNA recombination protein RmuC	1802,DNA recombination protein RmuC	1193,DNA recombination protein RmuC	1106,DNA recombination protein RmuC	1817,DNA recombination protein RmuC	1504,DNA recombination protein RmuC	1111,DNA recombination protein RmuC	1152,DNA recombination protein RmuC	1073,DNA recombination protein RmuC	1114,DNA recombination protein RmuC	927,DNA recombination protein RmuC	1100,DNA recombination protein RmuC	182,DNA recombination protein RmuC	625,DNA recombination protein RmuC	1549,DNA recombination protein RmuC	1307,DNA recombination protein RmuC	1032,DNA recombination protein RmuC	1152,DNA recombination protein RmuC	105,DNA recombination protein RmuC
565,3-&gt;5 exoribonuclease Bsu YhaM	747,3-&gt;5 exoribonuclease Bsu YhaM	1803,3-&gt;5 exoribonuclease Bsu YhaM	1192,3-&gt;5 exoribonuclease Bsu YhaM	1107,3-&gt;5 exoribonuclease Bsu YhaM	1818,3-&gt;5 exoribonuclease Bsu YhaM	1505,3-&gt;5 exoribonuclease Bsu YhaM	1112,3-&gt;5 exoribonuclease Bsu YhaM	1151,3-&gt;5 exoribonuclease Bsu YhaM	1074,3-&gt;5 exoribonuclease Bsu YhaM	1115,3-&gt;5 exoribonuclease Bsu YhaM	926,3-&gt;5 exoribonuclease Bsu YhaM	1099,3-&gt;5 exoribonuclease Bsu YhaM	183,3-&gt;5 exoribonuclease Bsu YhaM	624,3-&gt;5 exoribonuclease Bsu YhaM	1548,3-&gt;5 exoribonuclease Bsu YhaM	1308,3-&gt;5 exoribonuclease Bsu YhaM	1031,3-&gt;5 exoribonuclease Bsu YhaM	1153,3-&gt;5 exoribonuclease Bsu YhaM	104,3-&gt;5 exoribonuclease Bsu YhaM
566,PurR: transcription regulator associated with purine metabolism	748,PurR: transcription regulator associated with purine metabolism	1804,PurR: transcription regulator associated with purine metabolism	1191,PurR: transcription regulator associated with purine metabolism	1108,PurR: transcription regulator associated with purine metabolism	1819,PurR: transcription regulator associated with purine metabolism	1506,PurR: transcription regulator associated with purine metabolism	1113,PurR: transcription regulator associated with purine metabolism	1150,PurR: transcription regulator associated with purine metabolism	1075,PurR: transcription regulator associated with purine metabolism	1116,PurR: transcription regulator associated with purine metabolism	925,PurR: transcription regulator associated with purine metabolism	1098,PurR: transcription regulator associated with purine metabolism	184,PurR: transcription regulator associated with purine metabolism	623,PurR: transcription regulator associated with purine metabolism	1547,PurR: transcription regulator associated with purine metabolism	1309,PurR: transcription regulator associated with purine metabolism	1030,PurR: transcription regulator associated with purine metabolism	1154,PurR: transcription regulator associated with purine metabolism	103,PurR: transcription regulator associated with purine metabolism
567,Surface exclusion protein	749,Surface exclusion protein	1805,Surface exclusion protein	1190,Surface exclusion protein	1109,Surface exclusion protein	1820,Surface exclusion protein	1507,Surface exclusion protein	1114,Surface exclusion protein	1149,Surface exclusion protein	1076,Surface exclusion protein	1117,Surface exclusion protein	924,Surface exclusion protein	1097,Surface exclusion protein	185,Surface exclusion protein	622,Surface exclusion protein	1546,Surface exclusion protein	1310,Surface exclusion protein	1029,Surface exclusion protein	1155,Surface exclusion protein	102,Surface exclusion protein
568,SSU ribosomal protein S12p (S23e)	750,SSU ribosomal protein S12p (S23e)	1806,SSU ribosomal protein S12p (S23e)	1189,SSU ribosomal protein S12p (S23e)	1110,SSU ribosomal protein S12p (S23e)	1821,SSU ribosomal protein S12p (S23e)	1508,SSU ribosomal protein S12p (S23e)	1115,SSU ribosomal protein S12p (S23e)	1148,SSU ribosomal protein S12p (S23e)	1077,SSU ribosomal protein S12p (S23e)	1118,SSU ribosomal protein S12p (S23e)	923,SSU ribosomal protein S12p (S23e)	1096,SSU ribosomal protein S12p (S23e)	186,SSU ribosomal protein S12p (S23e)	621,SSU ribosomal protein S12p (S23e)	1545,SSU ribosomal protein S12p (S23e)	1311,SSU ribosomal protein S12p (S23e)	1028,SSU ribosomal protein S12p (S23e)	1156,SSU ribosomal protein S12p (S23e)	947,SSU ribosomal protein S12p (S23e)
569,SSU ribosomal protein S7p (S5e)	751,SSU ribosomal protein S7p (S5e)	1807,SSU ribosomal protein S7p (S5e)	1188,SSU ribosomal protein S7p (S5e)	1111,SSU ribosomal protein S7p (S5e)	1822,SSU ribosomal protein S7p (S5e)	1509,SSU ribosomal protein S7p (S5e)	1116,SSU ribosomal protein S7p (S5e)	1147,SSU ribosomal protein S7p (S5e)	1078,SSU ribosomal protein S7p (S5e)	1119,SSU ribosomal protein S7p (S5e)	922,SSU ribosomal protein S7p (S5e)	1095,SSU ribosomal protein S7p (S5e)	187,SSU ribosomal protein S7p (S5e)	620,SSU ribosomal protein S7p (S5e)	1544,SSU ribosomal protein S7p (S5e)	1312,SSU ribosomal protein S7p (S5e)	1027,SSU ribosomal protein S7p (S5e)	1157,SSU ribosomal protein S7p (S5e)	948,SSU ribosomal protein S7p (S5e)
570,hypothetical protein	752,hypothetical protein	- , -	- , -	- , -	- , -	- , -	- , -	1146,hypothetical protein	1079,hypothetical protein	1120,hypothetical protein	- , -	- , -	- , -	619,hypothetical protein	- , -	1313,hypothetical protein	- , -	- , -	- , -
571,Translation elongation factor G	753,Translation elongation factor G	1808,Translation elongation factor G	1187,Translation elongation factor G	1112,Translation elongation factor G	1823,Translation elongation factor G	1510,Translation elongation factor G	1117,Translation elongation factor G	1145,Translation elongation factor G	1080,Translation elongation factor G	1121,Translation elongation factor G	921,Translation elongation factor G	1094,Translation elongation factor G	188,Translation elongation factor G	618,Translation elongation factor G	1543,Translation elongation factor G	1314,Translation elongation factor G	1026,Translation elongation factor G	1158,Translation elongation factor G	949,Translation elongation factor G
572,NAD-dependent glyceraldehyde-3-phosphate dehydrogenase	754,NAD-dependent glyceraldehyde-3-phosphate dehydrogenase	1809,NAD-dependent glyceraldehyde-3-phosphate dehydrogenase	1186,NAD-dependent glyceraldehyde-3-phosphate dehydrogenase	1113,NAD-dependent glyceraldehyde-3-phosphate dehydrogenase	1824,NAD-dependent glyceraldehyde-3-phosphate dehydrogenase	1511,NAD-dependent glyceraldehyde-3-phosphate dehydrogenase	1118,NAD-dependent glyceraldehyde-3-phosphate dehydrogenase	1144,NAD-dependent glyceraldehyde-3-phosphate dehydrogenase	1081,NAD-dependent glyceraldehyde-3-phosphate dehydrogenase	1122,NAD-dependent glyceraldehyde-3-phosphate dehydrogenase	920,NAD-dependent glyceraldehyde-3-phosphate dehydrogenase	1093,NAD-dependent glyceraldehyde-3-phosphate dehydrogenase	189,NAD-dependent glyceraldehyde-3-phosphate dehydrogenase	617,NAD-dependent glyceraldehyde-3-phosphate dehydrogenase	1542,NAD-dependent glyceraldehyde-3-phosphate dehydrogenase	1315,NAD-dependent glyceraldehyde-3-phosphate dehydrogenase	1025,NAD-dependent glyceraldehyde-3-phosphate dehydrogenase	1159,NAD-dependent glyceraldehyde-3-phosphate dehydrogenase	950,NAD-dependent glyceraldehyde-3-phosphate dehydrogenase
573,hypothetical protein	755,hypothetical protein	- , -	- , -	- , -	- , -	- , -	- , -	- , -	- , -	- , -	- , -	- , -	- , -	616,hypothetical protein	- , -	1316,hypothetical protein	- , -	- , -	- , -
574,Phosphoglycerate kinase	756,Phosphoglycerate kinase	1810,Phosphoglycerate kinase	1185,Phosphoglycerate kinase	1114,Phosphoglycerate kinase	1825,Phosphoglycerate kinase	1512,Phosphoglycerate kinase	1119,Phosphoglycerate kinase	1143,Phosphoglycerate kinase	1082,Phosphoglycerate kinase	1123,Phosphoglycerate kinase	919,Phosphoglycerate kinase	1092,Phosphoglycerate kinase	190,Phosphoglycerate kinase	615,Phosphoglycerate kinase	1541,Phosphoglycerate kinase	1317,Phosphoglycerate kinase	1024,Phosphoglycerate kinase	1160,Phosphoglycerate kinase	951,Phosphoglycerate kinase
575,FIG01114549: hypothetical protein	757,FIG01114549: hypothetical protein	1811,FIG01114549: hypothetical protein	1184,FIG01114549: hypothetical protein	1115,FIG01114549: hypothetical protein	1826,FIG01114549: hypothetical protein	1513,FIG01114549: hypothetical protein	1222,FIG01114549: hypothetical protein	1367,FIG01114549: hypothetical protein	1330,FIG01114549: hypothetical protein	1317,FIG01114549: hypothetical protein	918,FIG01114549: hypothetical protein	1341,FIG01114549: hypothetical protein	191,FIG01114549: hypothetical protein	614,FIG01114549: hypothetical protein	1540,FIG01114549: hypothetical protein	1318,FIG01114549: hypothetical protein	1023,FIG01114549: hypothetical protein	1161,FIG01114549: hypothetical protein	953,FIG01114549: hypothetical protein
576,Transcriptional regulator, MerR family	758,Transcriptional regulator, MerR family	1812,Transcriptional regulator, MerR family	1182,Transcriptional regulator, MerR family	1117,Transcriptional regulator, MerR family	1827,Transcriptional regulator, MerR family	1514,Transcriptional regulator, MerR family	1221,Transcriptional regulator, MerR family	1368,Transcriptional regulator, MerR family	1331,Transcriptional regulator, MerR family	1318,Transcriptional regulator, MerR family	916,Transcriptional regulator, MerR family	1340,Transcriptional regulator, MerR family	192,Transcriptional regulator, MerR family	613,Transcriptional regulator, MerR family	1539,Transcriptional regulator, MerR family	1319,Transcriptional regulator, MerR family	1021,Transcriptional regulator, MerR family	1163,Transcriptional regulator, MerR family	954,Transcriptional regulator, MerR family
577,Glutamine synthetase type I	759,Glutamine synthetase type I	1813,Glutamine synthetase type I	1181,Glutamine synthetase type I	1118,Glutamine synthetase type I	1828,Glutamine synthetase type I	1515,Glutamine synthetase type I	1220,Glutamine synthetase type I	1369,Glutamine synthetase type I	1332,Glutamine synthetase type I	1319,Glutamine synthetase type I	915,Glutamine synthetase type I	1339,Glutamine synthetase type I	193,Glutamine synthetase type I	612,Glutamine synthetase type I	1538,Glutamine synthetase type I	1320,Glutamine synthetase type I	1020,Glutamine synthetase type I	1164,Glutamine synthetase type I	955,Glutamine synthetase type I
578,Oligopeptide ABC transporter, periplasmic oligopeptide-binding protein OppA (TC 3.A.1.5.1)	760,Oligopeptide ABC transporter, periplasmic oligopeptide-binding protein OppA (TC 3.A.1.5.1)	1884,Oligopeptide ABC transporter, periplasmic oligopeptide-binding protein OppA (TC 3.A.1.5.1)	1180,Oligopeptide ABC transporter, periplasmic oligopeptide-binding protein OppA (TC 3.A.1.5.1)	1119,Oligopeptide ABC transporter, periplasmic oligopeptide-binding protein OppA (TC 3.A.1.5.1)	1829,Oligopeptide ABC transporter, periplasmic oligopeptide-binding protein OppA (TC 3.A.1.5.1)	1516,Oligopeptide ABC transporter, periplasmic oligopeptide-binding protein OppA (TC 3.A.1.5.1)	1219,Oligopeptide ABC transporter, periplasmic oligopeptide-binding protein OppA (TC 3.A.1.5.1)	1370,Oligopeptide ABC transporter, periplasmic oligopeptide-binding protein OppA (TC 3.A.1.5.1)	1333,Oligopeptide ABC transporter, periplasmic oligopeptide-binding protein OppA (TC 3.A.1.5.1)	1320,Oligopeptide ABC transporter, periplasmic oligopeptide-binding protein OppA (TC 3.A.1.5.1)	914,Oligopeptide ABC transporter, periplasmic oligopeptide-binding protein OppA (TC 3.A.1.5.1)	1338,Oligopeptide ABC transporter, periplasmic oligopeptide-binding protein OppA (TC 3.A.1.5.1)	194,Oligopeptide ABC transporter, periplasmic oligopeptide-binding protein OppA (TC 3.A.1.5.1)	611,Oligopeptide ABC transporter, periplasmic oligopeptide-binding protein OppA (TC 3.A.1.5.1)	1537,Oligopeptide ABC transporter, periplasmic oligopeptide-binding protein OppA (TC 3.A.1.5.1)	1321,Oligopeptide ABC transporter, periplasmic oligopeptide-binding protein OppA (TC 3.A.1.5.1)	1019,Oligopeptide ABC transporter, periplasmic oligopeptide-binding protein OppA (TC 3.A.1.5.1)	1165,Oligopeptide ABC transporter, periplasmic oligopeptide-binding protein OppA (TC 3.A.1.5.1)	956,Oligopeptide ABC transporter, periplasmic oligopeptide-binding protein OppA (TC 3.A.1.5.1)
579,Oligopeptide transport system permease protein OppB (TC 3.A.1.5.1)	761,Oligopeptide transport system permease protein OppB (TC 3.A.1.5.1)	1883,Oligopeptide transport system permease protein OppB (TC 3.A.1.5.1)	1179,Oligopeptide transport system permease protein OppB (TC 3.A.1.5.1)	1120,Oligopeptide transport system permease protein OppB (TC 3.A.1.5.1)	1830,Oligopeptide transport system permease protein OppB (TC 3.A.1.5.1)	1517,Oligopeptide transport system permease protein OppB (TC 3.A.1.5.1)	1218,Oligopeptide transport system permease protein OppB (TC 3.A.1.5.1)	1371,Oligopeptide transport system permease protein OppB (TC 3.A.1.5.1)	1334,Oligopeptide transport system permease protein OppB (TC 3.A.1.5.1)	1321,Oligopeptide transport system permease protein OppB (TC 3.A.1.5.1)	913,Oligopeptide transport system permease protein OppB (TC 3.A.1.5.1)	1337,Oligopeptide transport system permease protein OppB (TC 3.A.1.5.1)	195,Oligopeptide transport system permease protein OppB (TC 3.A.1.5.1)	610,Oligopeptide transport system permease protein OppB (TC 3.A.1.5.1)	1536,Oligopeptide transport system permease protein OppB (TC 3.A.1.5.1)	1322,Oligopeptide transport system permease protein OppB (TC 3.A.1.5.1)	1018,Oligopeptide transport system permease protein OppB (TC 3.A.1.5.1)	1166,Oligopeptide transport system permease protein OppB (TC 3.A.1.5.1)	957,Oligopeptide transport system permease protein OppB (TC 3.A.1.5.1)
580,Oligopeptide transport system permease protein OppC (TC 3.A.1.5.1)	762,Oligopeptide transport system permease protein OppC (TC 3.A.1.5.1)	1882,Oligopeptide transport system permease protein OppC (TC 3.A.1.5.1)	1178,Oligopeptide transport system permease protein OppC (TC 3.A.1.5.1)	1121,Oligopeptide transport system permease protein OppC (TC 3.A.1.5.1)	1831,Oligopeptide transport system permease protein OppC (TC 3.A.1.5.1)	1518,Oligopeptide transport system permease protein OppC (TC 3.A.1.5.1)	1217,Oligopeptide transport system permease protein OppC (TC 3.A.1.5.1)	1372,Oligopeptide transport system permease protein OppC (TC 3.A.1.5.1)	1335,Oligopeptide transport system permease protein OppC (TC 3.A.1.5.1)	1322,Oligopeptide transport system permease protein OppC (TC 3.A.1.5.1)	912,Oligopeptide transport system permease protein OppC (TC 3.A.1.5.1)	1336,Oligopeptide transport system permease protein OppC (TC 3.A.1.5.1)	196,Oligopeptide transport system permease protein OppC (TC 3.A.1.5.1)	609,Oligopeptide transport system permease protein OppC (TC 3.A.1.5.1)	1535,Oligopeptide transport system permease protein OppC (TC 3.A.1.5.1)	1323,Oligopeptide transport system permease protein OppC (TC 3.A.1.5.1)	1017,Oligopeptide transport system permease protein OppC (TC 3.A.1.5.1)	1167,Oligopeptide transport system permease protein OppC (TC 3.A.1.5.1)	958,Oligopeptide transport system permease protein OppC (TC 3.A.1.5.1)
581,Oligopeptide transport system permease protein OppB (TC 3.A.1.5.1)	763,Oligopeptide transport system permease protein OppB (TC 3.A.1.5.1)	1881,Oligopeptide transport system permease protein OppB (TC 3.A.1.5.1)	1177,Oligopeptide transport system permease protein OppB (TC 3.A.1.5.1)	1122,Oligopeptide transport system permease protein OppB (TC 3.A.1.5.1)	1832,Oligopeptide transport system permease protein OppB (TC 3.A.1.5.1)	1519,Oligopeptide transport system permease protein OppB (TC 3.A.1.5.1)	1216,Oligopeptide transport system permease protein OppB (TC 3.A.1.5.1)	1373,Oligopeptide transport system permease protein OppB (TC 3.A.1.5.1)	1336,Oligopeptide transport system permease protein OppB (TC 3.A.1.5.1)	1323,Oligopeptide transport system permease protein OppB (TC 3.A.1.5.1)	911,Oligopeptide transport system permease protein OppB (TC 3.A.1.5.1)	1335,Oligopeptide transport system permease protein OppB (TC 3.A.1.5.1)	197,Oligopeptide transport system permease protein OppB (TC 3.A.1.5.1)	608,Oligopeptide transport system permease protein OppB (TC 3.A.1.5.1)	1534,Oligopeptide transport system permease protein OppB (TC 3.A.1.5.1)	1324,Oligopeptide transport system permease protein OppB (TC 3.A.1.5.1)	1016,Oligopeptide transport system permease protein OppB (TC 3.A.1.5.1)	1168,Oligopeptide transport system permease protein OppB (TC 3.A.1.5.1)	959,Oligopeptide transport system permease protein OppB (TC 3.A.1.5.1)
582,Oligopeptide transport ATP-binding protein OppF (TC 3.A.1.5.1)	764,Oligopeptide transport ATP-binding protein OppF (TC 3.A.1.5.1)	1880,Oligopeptide transport ATP-binding protein OppF (TC 3.A.1.5.1)	1176,Oligopeptide transport ATP-binding protein OppF (TC 3.A.1.5.1)	1123,Oligopeptide transport ATP-binding protein OppF (TC 3.A.1.5.1)	1833,Oligopeptide transport ATP-binding protein OppF (TC 3.A.1.5.1)	1520,Oligopeptide transport ATP-binding protein OppF (TC 3.A.1.5.1)	1215,Oligopeptide transport ATP-binding protein OppF (TC 3.A.1.5.1)	1374,Oligopeptide transport ATP-binding protein OppF (TC 3.A.1.5.1)	1337,Oligopeptide transport ATP-binding protein OppF (TC 3.A.1.5.1)	1324,Oligopeptide transport ATP-binding protein OppF (TC 3.A.1.5.1)	910,Oligopeptide transport ATP-binding protein OppF (TC 3.A.1.5.1)	1334,Oligopeptide transport ATP-binding protein OppF (TC 3.A.1.5.1)	198,Oligopeptide transport ATP-binding protein OppF (TC 3.A.1.5.1)	607,Oligopeptide transport ATP-binding protein OppF (TC 3.A.1.5.1)	1533,Oligopeptide transport ATP-binding protein OppF (TC 3.A.1.5.1)	1325,Oligopeptide transport ATP-binding protein OppF (TC 3.A.1.5.1)	1015,Oligopeptide transport ATP-binding protein OppF (TC 3.A.1.5.1)	1169,Oligopeptide transport ATP-binding protein OppF (TC 3.A.1.5.1)	960,Oligopeptide transport ATP-binding protein OppF (TC 3.A.1.5.1)
583,Bacteriocin-like peptide M BlpM	765,Bacteriocin-like peptide M BlpM	1878,Bacteriocin-like peptide M BlpM	1175,Bacteriocin-like peptide M BlpM	1124,Bacteriocin-like peptide M BlpM	1834,Bacteriocin-like peptide M BlpM	1521,hypothetical protein	1214,Bacteriocin-like peptide M BlpM	1375,Bacteriocin-like peptide M BlpM	1338,Bacteriocin-like peptide M BlpM	1325,Bacteriocin-like peptide M BlpM	909,Bacteriocin-like peptide M BlpM	1333,Bacteriocin-like peptide M BlpM	199,hypothetical protein	606,Bacteriocin-like peptide M BlpM	1532,hypothetical protein	1326,Bacteriocin-like peptide M BlpM	1014,Bacteriocin-like peptide M BlpM	1170,Bacteriocin-like peptide M BlpM	961,Bacteriocin-like peptide M BlpM
584,hypothetical protein	766,hypothetical protein	1877,hypothetical protein	1174,hypothetical protein	1125,hypothetical protein	1835,hypothetical protein	1522,hypothetical protein	1213,hypothetical protein	1376,hypothetical protein	1339,hypothetical protein	1326,hypothetical protein	908,hypothetical protein	1332,hypothetical protein	200,hypothetical protein	605,hypothetical protein	1531,hypothetical protein	1327,hypothetical protein	1013,hypothetical protein	1171,hypothetical protein	962,hypothetical protein
585,Ribonuclease J1 (endonuclease and 5 exonuclease)	767,Ribonuclease J1 (endonuclease and 5 exonuclease)	1876,Ribonuclease J1 (endonuclease and 5 exonuclease)	1173,Ribonuclease J1 (endonuclease and 5 exonuclease)	1126,Ribonuclease J1 (endonuclease and 5 exonuclease)	1836,Ribonuclease J1 (endonuclease and 5 exonuclease)	1523,Ribonuclease J1 (endonuclease and 5 exonuclease)	1653,Ribonuclease J1 (endonuclease and 5 exonuclease)	363,Ribonuclease J1 (endonuclease and 5 exonuclease)	351,Ribonuclease J1 (endonuclease and 5 exonuclease)	276,Ribonuclease J1 (endonuclease and 5 exonuclease)	907,Ribonuclease J1 (endonuclease and 5 exonuclease)	313,Ribonuclease J1 (endonuclease and 5 exonuclease)	201,Ribonuclease J1 (endonuclease and 5 exonuclease)	604,Ribonuclease J1 (endonuclease and 5 exonuclease)	1530,Ribonuclease J1 (endonuclease and 5 exonuclease)	1328,Ribonuclease J1 (endonuclease and 5 exonuclease)	1012,Ribonuclease J1 (endonuclease and 5 exonuclease)	1172,Ribonuclease J1 (endonuclease and 5 exonuclease)	963,Ribonuclease J1 (endonuclease and 5 exonuclease)
586,Protein of unknown function DUF1447	768,Protein of unknown function DUF1447	1875,Protein of unknown function DUF1447	1172,Protein of unknown function DUF1447	1127,Protein of unknown function DUF1447	1837,Protein of unknown function DUF1447	1524,Protein of unknown function DUF1447	1654,Protein of unknown function DUF1447	364,Protein of unknown function DUF1447	350,Protein of unknown function DUF1447	275,Protein of unknown function DUF1447	906,Protein of unknown function DUF1447	312,Protein of unknown function DUF1447	202,Protein of unknown function DUF1447	603,Protein of unknown function DUF1447	1529,Protein of unknown function DUF1447	1329,Protein of unknown function DUF1447	1011,Protein of unknown function DUF1447	1173,Protein of unknown function DUF1447	964,Protein of unknown function DUF1447
587,TsaB protein, required for threonylcarbamoyladenosine (t(6)A) formation in tRNA	769,TsaB protein, required for threonylcarbamoyladenosine (t(6)A) formation in tRNA	1874,TsaB protein, required for threonylcarbamoyladenosine (t(6)A) formation in tRNA	1171,TsaB protein, required for threonylcarbamoyladenosine (t(6)A) formation in tRNA	1128,TsaB protein, required for threonylcarbamoyladenosine (t(6)A) formation in tRNA	1838,TsaB protein, required for threonylcarbamoyladenosine (t(6)A) formation in tRNA	1525,TsaB protein, required for threonylcarbamoyladenosine (t(6)A) formation in tRNA	1655,TsaB protein, required for threonylcarbamoyladenosine (t(6)A) formation in tRNA	365,TsaB protein, required for threonylcarbamoyladenosine (t(6)A) formation in tRNA	349,TsaB protein, required for threonylcarbamoyladenosine (t(6)A) formation in tRNA	274,TsaB protein, required for threonylcarbamoyladenosine (t(6)A) formation in tRNA	905,TsaB protein, required for threonylcarbamoyladenosine (t(6)A) formation in tRNA	311,TsaB protein, required for threonylcarbamoyladenosine (t(6)A) formation in tRNA	203,TsaB protein, required for threonylcarbamoyladenosine (t(6)A) formation in tRNA	602,TsaB protein, required for threonylcarbamoyladenosine (t(6)A) formation in tRNA	1528,TsaB protein, required for threonylcarbamoyladenosine (t(6)A) formation in tRNA	1330,TsaB protein, required for threonylcarbamoyladenosine (t(6)A) formation in tRNA	1010,TsaB protein, required for threonylcarbamoyladenosine (t(6)A) formation in tRNA	1174,TsaB protein, required for threonylcarbamoyladenosine (t(6)A) formation in tRNA	965,TsaB protein, required for threonylcarbamoyladenosine (t(6)A) formation in tRNA
588,Ribosomal-protein-S18p-alanine acetyltransferase	770,Ribosomal-protein-S18p-alanine acetyltransferase	1873,Ribosomal-protein-S18p-alanine acetyltransferase	1170,Ribosomal-protein-S18p-alanine acetyltransferase	1129,Ribosomal-protein-S18p-alanine acetyltransferase	1839,Ribosomal-protein-S18p-alanine acetyltransferase	1526,Ribosomal-protein-S18p-alanine acetyltransferase	1656,Ribosomal-protein-S18p-alanine acetyltransferase	366,Ribosomal-protein-S18p-alanine acetyltransferase	348,Ribosomal-protein-S18p-alanine acetyltransferase	273,Ribosomal-protein-S18p-alanine acetyltransferase	904,Ribosomal-protein-S18p-alanine acetyltransferase	310,Ribosomal-protein-S18p-alanine acetyltransferase	204,Ribosomal-protein-S18p-alanine acetyltransferase	601,Ribosomal-protein-S18p-alanine acetyltransferase	1527,Ribosomal-protein-S18p-alanine acetyltransferase	1331,Ribosomal-protein-S18p-alanine acetyltransferase	1009,Ribosomal-protein-S18p-alanine acetyltransferase	1175,Ribosomal-protein-S18p-alanine acetyltransferase	966,Ribosomal-protein-S18p-alanine acetyltransferase
589,TsaD/Kae1/Qri7 protein, required for threonylcarbamoyladenosine t(6)A37 formation in tRNA	771,TsaD/Kae1/Qri7 protein, required for threonylcarbamoyladenosine t(6)A37 formation in tRNA	1872,TsaD/Kae1/Qri7 protein, required for threonylcarbamoyladenosine t(6)A37 formation in tRNA	1169,TsaD/Kae1/Qri7 protein, required for threonylcarbamoyladenosine t(6)A37 formation in tRNA	1130,TsaD/Kae1/Qri7 protein, required for threonylcarbamoyladenosine t(6)A37 formation in tRNA	1840,TsaD/Kae1/Qri7 protein, required for threonylcarbamoyladenosine t(6)A37 formation in tRNA	1527,TsaD/Kae1/Qri7 protein, required for threonylcarbamoyladenosine t(6)A37 formation in tRNA	1657,TsaD/Kae1/Qri7 protein, required for threonylcarbamoyladenosine t(6)A37 formation in tRNA	367,TsaD/Kae1/Qri7 protein, required for threonylcarbamoyladenosine t(6)A37 formation in tRNA	347,TsaD/Kae1/Qri7 protein, required for threonylcarbamoyladenosine t(6)A37 formation in tRNA	272,TsaD/Kae1/Qri7 protein, required for threonylcarbamoyladenosine t(6)A37 formation in tRNA	903,TsaD/Kae1/Qri7 protein, required for threonylcarbamoyladenosine t(6)A37 formation in tRNA	309,TsaD/Kae1/Qri7 protein, required for threonylcarbamoyladenosine t(6)A37 formation in tRNA	205,TsaD/Kae1/Qri7 protein, required for threonylcarbamoyladenosine t(6)A37 formation in tRNA	600,TsaD/Kae1/Qri7 protein, required for threonylcarbamoyladenosine t(6)A37 formation in tRNA	1526,TsaD/Kae1/Qri7 protein, required for threonylcarbamoyladenosine t(6)A37 formation in tRNA	1332,TsaD/Kae1/Qri7 protein, required for threonylcarbamoyladenosine t(6)A37 formation in tRNA	1008,TsaD/Kae1/Qri7 protein, required for threonylcarbamoyladenosine t(6)A37 formation in tRNA	1176,TsaD/Kae1/Qri7 protein, required for threonylcarbamoyladenosine t(6)A37 formation in tRNA	967,TsaD/Kae1/Qri7 protein, required for threonylcarbamoyladenosine t(6)A37 formation in tRNA
590,SSU ribosomal protein S14p (S29e) @ SSU ribosomal protein S14p (S29e), zinc-independent	772,SSU ribosomal protein S14p (S29e) @ SSU ribosomal protein S14p (S29e), zinc-independent	1871,SSU ribosomal protein S14p (S29e) @ SSU ribosomal protein S14p (S29e), zinc-independent	1168,SSU ribosomal protein S14p (S29e) @ SSU ribosomal protein S14p (S29e), zinc-independent	1131,SSU ribosomal protein S14p (S29e) @ SSU ribosomal protein S14p (S29e), zinc-independent	1841,SSU ribosomal protein S14p (S29e) @ SSU ribosomal protein S14p (S29e), zinc-independent	1528,SSU ribosomal protein S14p (S29e) @ SSU ribosomal protein S14p (S29e), zinc-independent	1658,SSU ribosomal protein S14p (S29e) @ SSU ribosomal protein S14p (S29e), zinc-independent	368,SSU ribosomal protein S14p (S29e) @ SSU ribosomal protein S14p (S29e), zinc-independent	346,SSU ribosomal protein S14p (S29e) @ SSU ribosomal protein S14p (S29e), zinc-independent	271,SSU ribosomal protein S14p (S29e) @ SSU ribosomal protein S14p (S29e), zinc-independent	902,SSU ribosomal protein S14p (S29e) @ SSU ribosomal protein S14p (S29e), zinc-independent	308,SSU ribosomal protein S14p (S29e) @ SSU ribosomal protein S14p (S29e), zinc-independent	206,SSU ribosomal protein S14p (S29e) @ SSU ribosomal protein S14p (S29e), zinc-independent	599,SSU ribosomal protein S14p (S29e) @ SSU ribosomal protein S14p (S29e), zinc-independent	1525,SSU ribosomal protein S14p (S29e) @ SSU ribosomal protein S14p (S29e), zinc-independent	1333,SSU ribosomal protein S14p (S29e) @ SSU ribosomal protein S14p (S29e), zinc-independent	1007,SSU ribosomal protein S14p (S29e) @ SSU ribosomal protein S14p (S29e), zinc-independent	1177,SSU ribosomal protein S14p (S29e) @ SSU ribosomal protein S14p (S29e), zinc-independent	968,SSU ribosomal protein S14p (S29e) @ SSU ribosomal protein S14p (S29e), zinc-independent
591,NAD(FAD)-utilizing dehydrogenases	773,NAD(FAD)-utilizing dehydrogenases	1869,NAD(FAD)-utilizing dehydrogenases	1167,NAD(FAD)-utilizing dehydrogenases	1132,NAD(FAD)-utilizing dehydrogenases	1842,NAD(FAD)-utilizing dehydrogenases	1529,NAD(FAD)-utilizing dehydrogenases	1660,NAD(FAD)-utilizing dehydrogenases	370,NAD(FAD)-utilizing dehydrogenases	344,NAD(FAD)-utilizing dehydrogenases	269,NAD(FAD)-utilizing dehydrogenases	901,NAD(FAD)-utilizing dehydrogenases	306,NAD(FAD)-utilizing dehydrogenases	818,NAD(FAD)-utilizing dehydrogenases	598,NAD(FAD)-utilizing dehydrogenases	1523,NAD(FAD)-utilizing dehydrogenases	1334,NAD(FAD)-utilizing dehydrogenases	1006,NAD(FAD)-utilizing dehydrogenases	1178,NAD(FAD)-utilizing dehydrogenases	458,NAD(FAD)-utilizing dehydrogenases
592,bacteriocin immunity protein	774,bacteriocin immunity protein	1868,bacteriocin immunity protein	304,bacteriocin immunity protein	199,bacteriocin immunity protein	1843,bacteriocin immunity protein	1530,bacteriocin immunity protein	1661,bacteriocin immunity protein	371,bacteriocin immunity protein	343,bacteriocin immunity protein	268,bacteriocin immunity protein	244,bacteriocin immunity protein	305,bacteriocin immunity protein	817,bacteriocin immunity protein	597,bacteriocin immunity protein	1522,bacteriocin immunity protein	1335,bacteriocin immunity protein	375,bacteriocin immunity protein	373,bacteriocin immunity protein	459,bacteriocin immunity protein
593,ABC transporter ATP-binding protein	775,ABC transporter ATP-binding protein	1867,ABC transporter ATP-binding protein	303,ABC transporter ATP-binding protein	200,ABC transporter ATP-binding protein	1844,ABC transporter ATP-binding protein	1531,ABC transporter ATP-binding protein	1662,ABC transporter ATP-binding protein	372,ABC transporter ATP-binding protein	342,ABC transporter ATP-binding protein	267,ABC transporter ATP-binding protein	243,ABC transporter ATP-binding protein	304,ABC transporter ATP-binding protein	816,ABC transporter ATP-binding protein	596,ABC transporter ATP-binding protein	1521,ABC transporter ATP-binding protein	1336,ABC transporter ATP-binding protein	376,ABC transporter ATP-binding protein	374,ABC transporter ATP-binding protein	460,ABC transporter ATP-binding protein
594,FIG01118284: hypothetical protein	776,FIG01118284: hypothetical protein	1866,FIG01118284: hypothetical protein	302,FIG01118284: hypothetical protein	201,FIG01118284: hypothetical protein	1845,FIG01118284: hypothetical protein	1533,FIG01118284: hypothetical protein	1663,FIG01118284: hypothetical protein	373,FIG01118284: hypothetical protein	341,FIG01118284: hypothetical protein	266,FIG01118284: hypothetical protein	242,FIG01118284: hypothetical protein	303,FIG01118284: hypothetical protein	815,FIG01118284: hypothetical protein	595,FIG01118284: hypothetical protein	1520,FIG01118284: hypothetical protein	1337,FIG01118284: hypothetical protein	377,FIG01118284: hypothetical protein	375,FIG01118284: hypothetical protein	462,FIG01118284: hypothetical protein
595,Transcriptional regulator OrfX	777,Transcriptional regulator OrfX	1865,Transcriptional regulator OrfX	301,Transcriptional regulator OrfX	202,Transcriptional regulator OrfX	1846,Transcriptional regulator OrfX	1534,Transcriptional regulator OrfX	1664,Transcriptional regulator OrfX	374,Transcriptional regulator OrfX	340,Transcriptional regulator OrfX	265,Transcriptional regulator OrfX	241,Transcriptional regulator OrfX	302,Transcriptional regulator OrfX	814,Transcriptional regulator OrfX	594,Transcriptional regulator OrfX	1519,Transcriptional regulator OrfX	1338,Transcriptional regulator OrfX	378,Transcriptional regulator OrfX	376,Transcriptional regulator OrfX	463,Transcriptional regulator OrfX
596,DNA polymerase III epsilon subunit	778,DNA polymerase III epsilon subunit	1864,DNA polymerase III epsilon subunit	300,DNA polymerase III epsilon subunit	203,DNA polymerase III epsilon subunit	1847,DNA polymerase III epsilon subunit	1546,DNA polymerase III epsilon subunit	1665,DNA polymerase III epsilon subunit	375,DNA polymerase III epsilon subunit	339,DNA polymerase III epsilon subunit	264,DNA polymerase III epsilon subunit	240,DNA polymerase III epsilon subunit	301,DNA polymerase III epsilon subunit	813,DNA polymerase III epsilon subunit	593,DNA polymerase III epsilon subunit	1518,DNA polymerase III epsilon subunit	1339,DNA polymerase III epsilon subunit	379,DNA polymerase III epsilon subunit	377,DNA polymerase III epsilon subunit	464,DNA polymerase III epsilon subunit
597,hypothetical protein	779,hypothetical protein	1863,hypothetical protein	299,hypothetical protein	204,hypothetical protein	1848,hypothetical protein	1547,hypothetical protein	1666,hypothetical protein	376,hypothetical protein	338,hypothetical protein	263,hypothetical protein	239,hypothetical protein	300,hypothetical protein	812,hypothetical protein	592,hypothetical protein	1517,hypothetical protein	1340,hypothetical protein	380,hypothetical protein	378,hypothetical protein	- , -
598,FIG000557: hypothetical protein co-occurring with RecR	780,FIG000557: hypothetical protein co-occurring with RecR	1862,FIG000557: hypothetical protein co-occurring with RecR	298,FIG000557: hypothetical protein co-occurring with RecR	205,FIG000557: hypothetical protein co-occurring with RecR	1849,FIG000557: hypothetical protein co-occurring with RecR	1548,FIG000557: hypothetical protein co-occurring with RecR	1667,FIG000557: hypothetical protein co-occurring with RecR	377,FIG000557: hypothetical protein co-occurring with RecR	337,FIG000557: hypothetical protein co-occurring with RecR	262,FIG000557: hypothetical protein co-occurring with RecR	238,FIG000557: hypothetical protein co-occurring with RecR	299,FIG000557: hypothetical protein co-occurring with RecR	811,FIG000557: hypothetical protein co-occurring with RecR	591,FIG000557: hypothetical protein co-occurring with RecR	1516,FIG000557: hypothetical protein co-occurring with RecR	1341,FIG000557: hypothetical protein co-occurring with RecR	381,FIG000557: hypothetical protein co-occurring with RecR	379,FIG000557: hypothetical protein co-occurring with RecR	465,FIG000557: hypothetical protein co-occurring with RecR
599,hypothetical protein	781,hypothetical protein	- , -	- , -	- , -	- , -	- , -	- , -	- , -	- , -	- , -	- , -	- , -	- , -	590,hypothetical protein	- , -	1342,hypothetical protein	- , -	- , -	- , -
600,Regulator of the multidrug efflux pump pmrA	782,Regulator of the multidrug efflux pump pmrA	- , -	- , -	- , -	- , -	- , -	- , -	- , -	- , -	- , -	- , -	- , -	- , -	589,Regulator of the multidrug efflux pump pmrA	- , -	1343,Regulator of the multidrug efflux pump pmrA	- , -	- , -	- , -
601,Putative acetyltransferase / Putative acetyltransferase, GNAT family / DNA-3-methyladenine glycosylase / GMP synthase [glutamine-hydrolyzing]	783,Putative acetyltransferase / Putative acetyltransferase, GNAT family / DNA-3-methyladenine glycosylase / GMP synthase [glutamine-hydrolyzing]	- , -	- , -	- , -	- , -	- , -	- , -	- , -	- , -	- , -	- , -	- , -	- , -	588,Putative acetyltransferase / Putative acetyltransferase, GNAT family / DNA-3-methyladenine glycosylase / GMP synthase [glutamine-hydrolyzing]	- , -	1344,Putative acetyltransferase / Putative acetyltransferase, GNAT family / DNA-3-methyladenine glycosylase / GMP synthase [glutamine-hydrolyzing]	- , -	- , -	- , -
602,Phenazine biosynthesis protein PhzF	784,Phenazine biosynthesis protein PhzF	- , -	- , -	- , -	- , -	- , -	- , -	- , -	- , -	- , -	- , -	- , -	- , -	587,Phenazine biosynthesis protein PhzF	- , -	1345,Phenazine biosynthesis protein PhzF	- , -	- , -	- , -
603,hypothetical protein	- , -	- , -	- , -	- , -	- , -	- , -	- , -	- , -	- , -	- , -	- , -	- , -	- , -	586,hypothetical protein	- , -	1346,hypothetical protein	- , -	- , -	- , -
604,hypothetical protein	787,hypothetical protein	- , -	297,hypothetical protein	207,hypothetical protein	1851,hypothetical protein	1549,hypothetical protein	- , -	- , -	- , -	- , -	237,hypothetical protein	- , -	809,hypothetical protein	584,hypothetical protein	1514,hypothetical protein	1348,hypothetical protein	383,hypothetical protein	381,hypothetical protein	- , -
605,Cell wall surface anchor family protein	788,Cell wall surface anchor family protein	1859,Cell wall surface anchor family protein	296,Cell wall surface anchor family protein	208,Cell wall surface anchor family protein	1852,Cell wall surface anchor family protein	1550,Cell wall surface anchor family protein	1670,Cell wall surface anchor family protein	380,Cell wall surface anchor family protein	333,Cell wall surface anchor family protein	259,Cell wall surface anchor family protein	236,Cell wall surface anchor family protein	297,Cell wall surface anchor family protein	808,Cell wall surface anchor family protein	583,Cell wall surface anchor family protein	1513,Cell wall surface anchor family protein	1349,Cell wall surface anchor family protein	384,Cell wall surface anchor family protein	382,Cell wall surface anchor family protein	467,Cell wall surface anchor family protein
606,hypothetical protein	789,hypothetical protein	1858,hypothetical protein	295,hypothetical protein	209,hypothetical protein	1853,hypothetical protein	- , -	1671,hypothetical protein	381,hypothetical protein	332,hypothetical protein	258,hypothetical protein	235,hypothetical protein	296,hypothetical protein	807,hypothetical protein	582,hypothetical protein	1512,hypothetical protein	1350,hypothetical protein	385,hypothetical protein	383,hypothetical protein	468,hypothetical protein
607,hypothetical protein	790,hypothetical protein	1857,hypothetical protein	294,hypothetical protein	210,hypothetical protein	1854,hypothetical protein	1551,hypothetical protein	1672,hypothetical protein	382,hypothetical protein	331,hypothetical protein	257,hypothetical protein	234,hypothetical protein	295,hypothetical protein	806,hypothetical protein	581,hypothetical protein	1511,hypothetical protein	1351,hypothetical protein	386,hypothetical protein	384,hypothetical protein	469,hypothetical protein
608,putative repressor - phage associated	791,putative repressor - phage associated	1856,putative repressor - phage associated	288,putative repressor - phage associated	216,putative repressor - phage associated	1860,putative repressor - phage associated	768,putative repressor - phage associated	1674,putative repressor - phage associated	384,putative repressor - phage associated	329,putative repressor - phage associated	255,putative repressor - phage associated	228,putative repressor - phage associated	293,putative repressor - phage associated	800,putative repressor - phage associated	580,putative repressor - phage associated	1505,putative repressor - phage associated	1352,putative repressor - phage associated	392,putative repressor - phage associated	390,putative repressor - phage associated	475,putative repressor - phage associated
609,Transcriptional regulator, Cro/CI family	792,Transcriptional regulator, Cro/CI family	1855,Transcriptional regulator, Cro/CI family	287,Transcriptional regulator, Cro/CI family	217,Transcriptional regulator, Cro/CI family	1861,Transcriptional regulator, Cro/CI family	769,Transcriptional regulator, Cro/CI family	1675,Transcriptional regulator, Cro/CI family	385,Transcriptional regulator, Cro/CI family	328,Transcriptional regulator, Cro/CI family	254,Transcriptional regulator, Cro/CI family	227,Transcriptional regulator, Cro/CI family	292,Transcriptional regulator, Cro/CI family	799,Transcriptional regulator, Cro/CI family	579,Transcriptional regulator, Cro/CI family	1504,Transcriptional regulator, Cro/CI family	1353,Transcriptional regulator, Cro/CI family	393,Transcriptional regulator, Cro/CI family	391,Transcriptional regulator, Cro/CI family	476,Transcriptional regulator, Cro/CI family
610,Xaa-Pro dipeptidyl-peptidase	793,Xaa-Pro dipeptidyl-peptidase	1854,Xaa-Pro dipeptidyl-peptidase	286,Xaa-Pro dipeptidyl-peptidase	218,Xaa-Pro dipeptidyl-peptidase	1862,Xaa-Pro dipeptidyl-peptidase	770,Xaa-Pro dipeptidyl-peptidase	1676,Xaa-Pro dipeptidyl-peptidase	386,Xaa-Pro dipeptidyl-peptidase	327,Xaa-Pro dipeptidyl-peptidase	253,Xaa-Pro dipeptidyl-peptidase	226,Xaa-Pro dipeptidyl-peptidase	291,Xaa-Pro dipeptidyl-peptidase	798,Xaa-Pro dipeptidyl-peptidase	578,Xaa-Pro dipeptidyl-peptidase	1503,Xaa-Pro dipeptidyl-peptidase	1354,Xaa-Pro dipeptidyl-peptidase	394,Xaa-Pro dipeptidyl-peptidase	392,Xaa-Pro dipeptidyl-peptidase	477,Xaa-Pro dipeptidyl-peptidase
611,Transcriptional regulator, CrP/Fnr family	794,Transcriptional regulator, CrP/Fnr family	1853,Transcriptional regulator, CrP/Fnr family	285,Transcriptional regulator, CrP/Fnr family	219,Transcriptional regulator, CrP/Fnr family	1863,Transcriptional regulator, CrP/Fnr family	771,Transcriptional regulator, CrP/Fnr family	1677,Transcriptional regulator, CrP/Fnr family	387,Transcriptional regulator, CrP/Fnr family	326,Transcriptional regulator, CrP/Fnr family	252,Transcriptional regulator, CrP/Fnr family	225,Transcriptional regulator, CrP/Fnr family	290,Transcriptional regulator, CrP/Fnr family	797,Transcriptional regulator, CrP/Fnr family	577,Transcriptional regulator, CrP/Fnr family	1502,Transcriptional regulator, CrP/Fnr family	1355,Transcriptional regulator, CrP/Fnr family	395,Transcriptional regulator, CrP/Fnr family	393,Transcriptional regulator, CrP/Fnr family	478,Transcriptional regulator, CrP/Fnr family
612,Zinc transport protein ZntB	795,Zinc transport protein ZntB	1852,Zinc transport protein ZntB	284,Zinc transport protein ZntB	220,Zinc transport protein ZntB	1864,Zinc transport protein ZntB	772,Zinc transport protein ZntB	1678,Zinc transport protein ZntB	388,Zinc transport protein ZntB	325,Zinc transport protein ZntB	251,Zinc transport protein ZntB	224,Zinc transport protein ZntB	289,Zinc transport protein ZntB	796,Zinc transport protein ZntB	576,Zinc transport protein ZntB	1501,Zinc transport protein ZntB	1356,Zinc transport protein ZntB	396,Zinc transport protein ZntB	394,Zinc transport protein ZntB	479,Zinc transport protein ZntB
613,Universal stress protein family	796,Universal stress protein family	1851,Universal stress protein family	283,Universal stress protein family	221,Universal stress protein family	1865,Universal stress protein family	773,Universal stress protein family	1679,Universal stress protein family	389,Universal stress protein family	324,Universal stress protein family	250,Universal stress protein family	223,Universal stress protein family	288,Universal stress protein family	795,Universal stress protein family	575,Universal stress protein family	1500,Universal stress protein family	1357,Universal stress protein family	397,Universal stress protein family	395,Universal stress protein family	480,Universal stress protein family
614,hypothetical protein	797,hypothetical protein	1850,hypothetical protein	- , -	- , -	- , -	- , -	1680,hypothetical protein	390,hypothetical protein	323,hypothetical protein	249,hypothetical protein	- , -	287,hypothetical protein	794,hypothetical protein	574,hypothetical protein	1499,hypothetical protein	1358,hypothetical protein	- , -	- , -	- , -
615,Aquaporin (Major Intrinsic Protein Family)	798,Aquaporin (Major Intrinsic Protein Family)	1849,Aquaporin (Major Intrinsic Protein Family)	282,Aquaporin (Major Intrinsic Protein Family)	222,Aquaporin (Major Intrinsic Protein Family)	1866,Aquaporin (Major Intrinsic Protein Family)	774,Aquaporin (Major Intrinsic Protein Family)	1681,Aquaporin (Major Intrinsic Protein Family)	391,Aquaporin (Major Intrinsic Protein Family)	322,Aquaporin (Major Intrinsic Protein Family)	248,Aquaporin (Major Intrinsic Protein Family)	222,Aquaporin (Major Intrinsic Protein Family)	286,Aquaporin (Major Intrinsic Protein Family)	792,Aquaporin (Major Intrinsic Protein Family)	573,Aquaporin (Major Intrinsic Protein Family)	1497,Aquaporin (Major Intrinsic Protein Family)	1359,Aquaporin (Major Intrinsic Protein Family)	398,Aquaporin (Major Intrinsic Protein Family)	396,Aquaporin (Major Intrinsic Protein Family)	481,Aquaporin (Major Intrinsic Protein Family)
616,Integral membrane protein	799,Integral membrane protein	1848,Integral membrane protein	281,Integral membrane protein	223,Integral membrane protein	1867,Integral membrane protein	775,Integral membrane protein	1682,Integral membrane protein	392,Integral membrane protein	321,Integral membrane protein	247,Integral membrane protein	221,Integral membrane protein	285,Integral membrane protein	791,Integral membrane protein	572,Integral membrane protein	1496,Integral membrane protein	1360,Integral membrane protein	399,Integral membrane protein	397,Integral membrane protein	482,Integral membrane protein
617,C3-degrading proteinase	800,C3-degrading proteinase	1847,C3-degrading proteinase	280,C3-degrading proteinase	224,C3-degrading proteinase	1868,C3-degrading proteinase	776,C3-degrading proteinase	1683,C3-degrading proteinase	393,C3-degrading proteinase	320,C3-degrading proteinase	246,C3-degrading proteinase	220,C3-degrading proteinase	284,C3-degrading proteinase	790,C3-degrading proteinase	571,C3-degrading proteinase	1495,C3-degrading proteinase	1361,C3-degrading proteinase	400,C3-degrading proteinase	398,C3-degrading proteinase	483,C3-degrading proteinase
618,Beta-lactamase, class C	801,Beta-lactamase, class C	1846,Beta-lactamase, class C	279,Beta-lactamase, class C	225,Beta-lactamase, class C	1869,Beta-lactamase, class C	777,Beta-lactamase, class C	1684,Beta-lactamase, class C	394,Beta-lactamase, class C	319,Beta-lactamase, class C	245,Beta-lactamase, class C	219,Beta-lactamase, class C	283,Beta-lactamase, class C	789,Beta-lactamase, class C	570,Beta-lactamase, class C	1494,Beta-lactamase, class C	1362,Beta-lactamase, class C	401,Beta-lactamase, class C	399,Beta-lactamase, class C	484,Beta-lactamase, class C
619,GNAT family acetyltransferase YjcF	802,GNAT family acetyltransferase YjcF	1845,GNAT family acetyltransferase YjcF	278,GNAT family acetyltransferase YjcF	226,GNAT family acetyltransferase YjcF	1870,GNAT family acetyltransferase YjcF	778,GNAT family acetyltransferase YjcF	1685,GNAT family acetyltransferase YjcF	395,GNAT family acetyltransferase YjcF	318,GNAT family acetyltransferase YjcF	244,GNAT family acetyltransferase YjcF	218,GNAT family acetyltransferase YjcF	282,GNAT family acetyltransferase YjcF	788,GNAT family acetyltransferase YjcF	569,GNAT family acetyltransferase YjcF	1493,GNAT family acetyltransferase YjcF	1363,GNAT family acetyltransferase YjcF	402,GNAT family acetyltransferase YjcF	400,GNAT family acetyltransferase YjcF	485,GNAT family acetyltransferase YjcF
620,Pyruvate formate-lyase	803,Pyruvate formate-lyase	1844,Pyruvate formate-lyase	277,Pyruvate formate-lyase	227,Pyruvate formate-lyase	1871,Pyruvate formate-lyase	779,Pyruvate formate-lyase	1686,Pyruvate formate-lyase	396,Pyruvate formate-lyase	317,Pyruvate formate-lyase	243,Pyruvate formate-lyase	217,Pyruvate formate-lyase	281,Pyruvate formate-lyase	787,Pyruvate formate-lyase	568,Pyruvate formate-lyase	1492,Pyruvate formate-lyase	1364,Pyruvate formate-lyase	403,Pyruvate formate-lyase	401,Pyruvate formate-lyase	486,Pyruvate formate-lyase
621,DNA polymerase IV	804,DNA polymerase IV	1843,DNA polymerase IV	276,DNA polymerase IV	228,DNA polymerase IV	1872,DNA polymerase IV	780,DNA polymerase IV	1687,DNA polymerase IV	397,DNA polymerase IV	316,DNA polymerase IV	242,DNA polymerase IV	216,DNA polymerase IV	280,DNA polymerase IV	786,DNA polymerase IV	567,DNA polymerase IV	1491,DNA polymerase IV	1365,DNA polymerase IV	404,DNA polymerase IV	402,DNA polymerase IV	487,DNA polymerase IV
622,Putative membrane protein precursor SPs0273	805,Putative membrane protein precursor SPs0273	1377,Putative membrane protein precursor SPs0273	275,Putative membrane protein precursor SPs0273	229,Putative membrane protein precursor SPs0273	1873,Putative membrane protein precursor SPs0273	781,Putative membrane protein precursor SPs0273	1688,Putative membrane protein precursor SPs0273	398,Putative membrane protein precursor SPs0273	315,Putative membrane protein precursor SPs0273	241,Putative membrane protein precursor SPs0273	215,Putative membrane protein precursor SPs0273	279,Putative membrane protein precursor SPs0273	785,Putative membrane protein precursor SPs0273	566,Putative membrane protein precursor SPs0273	1490,Putative membrane protein precursor SPs0273	1366,Putative membrane protein precursor SPs0273	405,Putative membrane protein precursor SPs0273	403,Putative membrane protein precursor SPs0273	488,Putative membrane protein precursor SPs0273
623,RecD-like DNA helicase YrrC	806,RecD-like DNA helicase YrrC	1378,RecD-like DNA helicase YrrC	274,RecD-like DNA helicase YrrC	230,RecD-like DNA helicase YrrC	1874,RecD-like DNA helicase YrrC	782,RecD-like DNA helicase YrrC	1689,RecD-like DNA helicase YrrC	399,RecD-like DNA helicase YrrC	314,RecD-like DNA helicase YrrC	240,RecD-like DNA helicase YrrC	214,RecD-like DNA helicase YrrC	278,RecD-like DNA helicase YrrC	784,RecD-like DNA helicase YrrC	565,RecD-like DNA helicase YrrC	1489,RecD-like DNA helicase YrrC	1367,RecD-like DNA helicase YrrC	406,RecD-like DNA helicase YrrC	404,RecD-like DNA helicase YrrC	489,RecD-like DNA helicase YrrC
624,Signal peptidase I	807,Signal peptidase I	1379,Signal peptidase I	273,Signal peptidase I	231,Signal peptidase I	1875,Signal peptidase I	783,Signal peptidase I	1690,Signal peptidase I	400,Signal peptidase I	313,Signal peptidase I	239,Signal peptidase I	213,Signal peptidase I	277,Signal peptidase I	783,Signal peptidase I	564,Signal peptidase I	1488,Signal peptidase I	1368,Signal peptidase I	407,Signal peptidase I	405,Signal peptidase I	490,Signal peptidase I
625,Ribonuclease HIII	808,Ribonuclease HIII	1380,Ribonuclease HIII	272,Ribonuclease HIII	232,Ribonuclease HIII	1876,Ribonuclease HIII	784,Ribonuclease HIII	1691,Ribonuclease HIII	401,Ribonuclease HIII	312,Ribonuclease HIII	238,Ribonuclease HIII	212,Ribonuclease HIII	276,Ribonuclease HIII	782,Ribonuclease HIII	563,Ribonuclease HIII	1487,Ribonuclease HIII	1369,Ribonuclease HIII	408,Ribonuclease HIII	406,Ribonuclease HIII	491,Ribonuclease HIII
626,FIG01114225: hypothetical protein	809,FIG01114225: hypothetical protein	1381,FIG01114225: hypothetical protein	271,FIG01114225: hypothetical protein	233,FIG01114225: hypothetical protein	1877,FIG01114225: hypothetical protein	785,FIG01114225: hypothetical protein	1692,FIG01114225: hypothetical protein	402,FIG01114225: hypothetical protein	311,FIG01114225: hypothetical protein	237,FIG01114225: hypothetical protein	211,FIG01114225: hypothetical protein	275,FIG01114225: hypothetical protein	781,FIG01114225: hypothetical protein	562,FIG01114225: hypothetical protein	1486,FIG01114225: hypothetical protein	1370,FIG01114225: hypothetical protein	409,FIG01114225: hypothetical protein	407,FIG01114225: hypothetical protein	493,FIG01114225: hypothetical protein
627,Colicin V production protein	810,Colicin V production protein	1382,Colicin V production protein	270,Colicin V production protein	234,Colicin V production protein	1878,Colicin V production protein	786,Colicin V production protein	1693,Colicin V production protein	403,Colicin V production protein	310,Colicin V production protein	236,Colicin V production protein	210,Colicin V production protein	274,Colicin V production protein	780,Colicin V production protein	561,Colicin V production protein	1485,Colicin V production protein	1371,Colicin V production protein	410,Colicin V production protein	408,Colicin V production protein	494,Colicin V production protein
628,Recombination inhibitory protein MutS2	812,Recombination inhibitory protein MutS2	1383,Recombination inhibitory protein MutS2	269,Recombination inhibitory protein MutS2	235,Recombination inhibitory protein MutS2	1879,Recombination inhibitory protein MutS2	787,Recombination inhibitory protein MutS2	1694,Recombination inhibitory protein MutS2	404,Recombination inhibitory protein MutS2	309,Recombination inhibitory protein MutS2	235,Recombination inhibitory protein MutS2	209,Recombination inhibitory protein MutS2	273,Recombination inhibitory protein MutS2	779,Recombination inhibitory protein MutS2	560,Recombination inhibitory protein MutS2	1484,Recombination inhibitory protein MutS2	1372,Recombination inhibitory protein MutS2	411,Recombination inhibitory protein MutS2	409,Recombination inhibitory protein MutS2	495,Recombination inhibitory protein MutS2
629,Thioredoxin	813,Thioredoxin	1384,Thioredoxin	268,Thioredoxin	236,Thioredoxin	1880,Thioredoxin	788,Thioredoxin	1695,Thioredoxin	405,Thioredoxin	308,Thioredoxin	234,Thioredoxin	208,Thioredoxin	272,Thioredoxin	778,Thioredoxin	559,Thioredoxin	1483,Thioredoxin	1373,Thioredoxin	412,Thioredoxin	410,Thioredoxin	496,Thioredoxin
630,hypothetical protein	814,hypothetical protein	1385,hypothetical protein	267,hypothetical protein	237,hypothetical protein	- , -	- , -	- , -	- , -	307,hypothetical protein	233,hypothetical protein	207,hypothetical protein	271,hypothetical protein	- , -	558,hypothetical protein	- , -	1374,hypothetical protein	413,hypothetical protein	411,hypothetical protein	497,hypothetical protein
631,A/G-specific adenine glycosylase	815,A/G-specific adenine glycosylase	1386,A/G-specific adenine glycosylase	266,A/G-specific adenine glycosylase	238,A/G-specific adenine glycosylase	1881,A/G-specific adenine glycosylase	789,A/G-specific adenine glycosylase	1696,A/G-specific adenine glycosylase	487,A/G-specific adenine glycosylase	306,A/G-specific adenine glycosylase	232,A/G-specific adenine glycosylase	206,A/G-specific adenine glycosylase	270,A/G-specific adenine glycosylase	777,A/G-specific adenine glycosylase	557,A/G-specific adenine glycosylase	1482,A/G-specific adenine glycosylase	1375,A/G-specific adenine glycosylase	414,A/G-specific adenine glycosylase	412,A/G-specific adenine glycosylase	498,A/G-specific adenine glycosylase
632,SSU ribosomal protein S6p	816,SSU ribosomal protein S6p	1387,SSU ribosomal protein S6p	265,SSU ribosomal protein S6p	239,SSU ribosomal protein S6p	1067,SSU ribosomal protein S6p	1310,SSU ribosomal protein S6p	1697,SSU ribosomal protein S6p	486,SSU ribosomal protein S6p	305,SSU ribosomal protein S6p	231,SSU ribosomal protein S6p	205,SSU ribosomal protein S6p	269,SSU ribosomal protein S6p	1593,SSU ribosomal protein S6p	556,SSU ribosomal protein S6p	826,SSU ribosomal protein S6p	1376,SSU ribosomal protein S6p	415,SSU ribosomal protein S6p	413,SSU ribosomal protein S6p	782,SSU ribosomal protein S6p
633,Single-stranded DNA-binding protein	817,Single-stranded DNA-binding protein	1388,Single-stranded DNA-binding protein	264,Single-stranded DNA-binding protein	240,Single-stranded DNA-binding protein	1066,Single-stranded DNA-binding protein	1309,Single-stranded DNA-binding protein	1698,Single-stranded DNA-binding protein	485,Single-stranded DNA-binding protein	304,Single-stranded DNA-binding protein	230,Single-stranded DNA-binding protein	204,Single-stranded DNA-binding protein	268,Single-stranded DNA-binding protein	1592,Single-stranded DNA-binding protein	555,Single-stranded DNA-binding protein	825,Single-stranded DNA-binding protein	1377,Single-stranded DNA-binding protein	416,Single-stranded DNA-binding protein	414,Single-stranded DNA-binding protein	783,Single-stranded DNA-binding protein
634,SSU ribosomal protein S18p @ SSU ribosomal protein S18p, zinc-independent	818,SSU ribosomal protein S18p @ SSU ribosomal protein S18p, zinc-independent	1389,SSU ribosomal protein S18p @ SSU ribosomal protein S18p, zinc-independent	263,SSU ribosomal protein S18p @ SSU ribosomal protein S18p, zinc-independent	241,SSU ribosomal protein S18p @ SSU ribosomal protein S18p, zinc-independent	1065,SSU ribosomal protein S18p @ SSU ribosomal protein S18p, zinc-independent	1308,SSU ribosomal protein S18p @ SSU ribosomal protein S18p, zinc-independent	1699,SSU ribosomal protein S18p @ SSU ribosomal protein S18p, zinc-independent	484,SSU ribosomal protein S18p @ SSU ribosomal protein S18p, zinc-independent	303,SSU ribosomal protein S18p @ SSU ribosomal protein S18p, zinc-independent	229,SSU ribosomal protein S18p @ SSU ribosomal protein S18p, zinc-independent	203,SSU ribosomal protein S18p @ SSU ribosomal protein S18p, zinc-independent	267,SSU ribosomal protein S18p @ SSU ribosomal protein S18p, zinc-independent	1591,SSU ribosomal protein S18p @ SSU ribosomal protein S18p, zinc-independent	554,SSU ribosomal protein S18p @ SSU ribosomal protein S18p, zinc-independent	824,SSU ribosomal protein S18p @ SSU ribosomal protein S18p, zinc-independent	1378,SSU ribosomal protein S18p @ SSU ribosomal protein S18p, zinc-independent	417,SSU ribosomal protein S18p @ SSU ribosomal protein S18p, zinc-independent	415,SSU ribosomal protein S18p @ SSU ribosomal protein S18p, zinc-independent	784,SSU ribosomal protein S18p @ SSU ribosomal protein S18p, zinc-independent
635,hypothetical protein	819,hypothetical protein	1390,hypothetical protein	262,hypothetical protein	242,hypothetical protein	1064,hypothetical protein	1307,hypothetical protein	1700,hypothetical protein	483,hypothetical protein	- , -	- , -	202,hypothetical protein	- , -	1590,hypothetical protein	553,hypothetical protein	823,hypothetical protein	1379,hypothetical protein	418,hypothetical protein	416,hypothetical protein	785,hypothetical protein
636,Integral membrane protein	820,Integral membrane protein	1391,Integral membrane protein	261,Integral membrane protein	243,Integral membrane protein	1063,Integral membrane protein	440,Integral membrane protein	1701,Integral membrane protein	482,Integral membrane protein	435,Integral membrane protein	399,Integral membrane protein	201,Integral membrane protein	434,Integral membrane protein	1589,Integral membrane protein	552,Integral membrane protein	822,Integral membrane protein	1380,Integral membrane protein	419,Integral membrane protein	417,Integral membrane protein	786,Integral membrane protein
637,Magnesium and cobalt transport protein CorA	821,Magnesium and cobalt transport protein CorA	1392,Magnesium and cobalt transport protein CorA	259,Magnesium and cobalt transport protein CorA	245,Magnesium and cobalt transport protein CorA	1062,Magnesium and cobalt transport protein CorA	441,Magnesium and cobalt transport protein CorA	1702,Magnesium and cobalt transport protein CorA	481,Magnesium and cobalt transport protein CorA	436,Magnesium and cobalt transport protein CorA	400,Magnesium and cobalt transport protein CorA	199,Magnesium and cobalt transport protein CorA	435,Magnesium and cobalt transport protein CorA	1588,Magnesium and cobalt transport protein CorA	551,Magnesium and cobalt transport protein CorA	821,Magnesium and cobalt transport protein CorA	1381,Magnesium and cobalt transport protein CorA	421,Magnesium and cobalt transport protein CorA	419,Magnesium and cobalt transport protein CorA	787,Magnesium and cobalt transport protein CorA
638,hypothetical protein	822,hypothetical protein	1393,hypothetical protein	258,hypothetical protein	- , -	1061,hypothetical protein	442,hypothetical protein	1703,hypothetical protein	480,hypothetical protein	437,hypothetical protein	401,hypothetical protein	198,hypothetical protein	436,hypothetical protein	1587,hypothetical protein	550,hypothetical protein	820,hypothetical protein	1382,hypothetical protein	- , -	- , -	788,hypothetical protein
639,Streptodornase D	823,Streptodornase D	1394,Streptodornase D	257,Streptodornase D	246,Streptodornase D	1060,Streptodornase D	443,Streptodornase D	1704,Streptodornase D	479,Streptodornase D	438,Streptodornase D	402,Streptodornase D	197,Streptodornase D	437,Streptodornase D	1586,Streptodornase D	549,Streptodornase D	819,Streptodornase D	1383,Streptodornase D	422,Streptodornase D	420,Streptodornase D	789,Streptodornase D
640,Excinuclease ABC subunit A	824,Excinuclease ABC subunit A	1395,Excinuclease ABC subunit A	256,Excinuclease ABC subunit A	247,Excinuclease ABC subunit A	1059,Excinuclease ABC subunit A	444,Excinuclease ABC subunit A	1705,Excinuclease ABC subunit A	478,Excinuclease ABC subunit A	439,Excinuclease ABC subunit A	403,Excinuclease ABC subunit A	196,Excinuclease ABC subunit A	438,Excinuclease ABC subunit A	1585,Excinuclease ABC subunit A	548,Excinuclease ABC subunit A	818,Excinuclease ABC subunit A	1384,Excinuclease ABC subunit A	423,Excinuclease ABC subunit A	421,Excinuclease ABC subunit A	790,Excinuclease ABC subunit A
641,Aminopeptidase YpdF (MP-, MA-, MS-, AP-, NP- specific)	825,Aminopeptidase YpdF (MP-, MA-, MS-, AP-, NP- specific)	1396,Aminopeptidase YpdF (MP-, MA-, MS-, AP-, NP- specific)	255,Aminopeptidase YpdF (MP-, MA-, MS-, AP-, NP- specific)	248,Aminopeptidase YpdF (MP-, MA-, MS-, AP-, NP- specific)	1058,Aminopeptidase YpdF (MP-, MA-, MS-, AP-, NP- specific)	445,Aminopeptidase YpdF (MP-, MA-, MS-, AP-, NP- specific)	1706,Aminopeptidase YpdF (MP-, MA-, MS-, AP-, NP- specific)	477,Aminopeptidase YpdF (MP-, MA-, MS-, AP-, NP- specific)	440,Aminopeptidase YpdF (MP-, MA-, MS-, AP-, NP- specific)	404,Aminopeptidase YpdF (MP-, MA-, MS-, AP-, NP- specific)	195,Aminopeptidase YpdF (MP-, MA-, MS-, AP-, NP- specific)	439,Aminopeptidase YpdF (MP-, MA-, MS-, AP-, NP- specific)	1584,Aminopeptidase YpdF (MP-, MA-, MS-, AP-, NP- specific)	547,Aminopeptidase YpdF (MP-, MA-, MS-, AP-, NP- specific)	817,Aminopeptidase YpdF (MP-, MA-, MS-, AP-, NP- specific)	1385,Aminopeptidase YpdF (MP-, MA-, MS-, AP-, NP- specific)	424,Aminopeptidase YpdF (MP-, MA-, MS-, AP-, NP- specific)	422,Aminopeptidase YpdF (MP-, MA-, MS-, AP-, NP- specific)	791,Aminopeptidase YpdF (MP-, MA-, MS-, AP-, NP- specific)
642,dCMP deaminase; Late competence protein ComEB	826,dCMP deaminase; Late competence protein ComEB	1397,dCMP deaminase; Late competence protein ComEB	254,dCMP deaminase; Late competence protein ComEB	249,dCMP deaminase; Late competence protein ComEB	1057,dCMP deaminase; Late competence protein ComEB	446,dCMP deaminase; Late competence protein ComEB	1707,dCMP deaminase; Late competence protein ComEB	476,dCMP deaminase; Late competence protein ComEB	441,dCMP deaminase; Late competence protein ComEB	405,dCMP deaminase; Late competence protein ComEB	194,dCMP deaminase; Late competence protein ComEB	440,dCMP deaminase; Late competence protein ComEB	1583,dCMP deaminase; Late competence protein ComEB	546,dCMP deaminase; Late competence protein ComEB	816,dCMP deaminase; Late competence protein ComEB	1386,dCMP deaminase; Late competence protein ComEB	425,dCMP deaminase; Late competence protein ComEB	423,dCMP deaminase; Late competence protein ComEB	792,dCMP deaminase; Late competence protein ComEB
643,Translation elongation factor P	827,Translation elongation factor P	1398,Translation elongation factor P	253,Translation elongation factor P	250,Translation elongation factor P	1056,Translation elongation factor P	447,Translation elongation factor P	1708,Translation elongation factor P	475,Translation elongation factor P	442,Translation elongation factor P	406,Translation elongation factor P	193,Translation elongation factor P	441,Translation elongation factor P	1582,Translation elongation factor P	545,Translation elongation factor P	815,Translation elongation factor P	1387,Translation elongation factor P	426,Translation elongation factor P	424,Translation elongation factor P	793,Translation elongation factor P
644,Alkaline shock protein	828,Alkaline shock protein	1399,Alkaline shock protein	252,Alkaline shock protein	251,Alkaline shock protein	1055,Alkaline shock protein	448,Alkaline shock protein	1709,Alkaline shock protein	474,Alkaline shock protein	443,Alkaline shock protein	407,Alkaline shock protein	192,Alkaline shock protein	442,Alkaline shock protein	1581,Alkaline shock protein	544,Alkaline shock protein	814,Alkaline shock protein	1388,Alkaline shock protein	427,Alkaline shock protein	425,Alkaline shock protein	794,Alkaline shock protein
645,Transcription termination protein NusB	829,Transcription termination protein NusB	1400,Transcription termination protein NusB	251,Transcription termination protein NusB	252,Transcription termination protein NusB	1054,Transcription termination protein NusB	449,Transcription termination protein NusB	1710,Transcription termination protein NusB	473,Transcription termination protein NusB	444,Transcription termination protein NusB	408,Transcription termination protein NusB	191,Transcription termination protein NusB	443,Transcription termination protein NusB	1580,Transcription termination protein NusB	543,Transcription termination protein NusB	813,Transcription termination protein NusB	1389,Transcription termination protein NusB	428,Transcription termination protein NusB	426,Transcription termination protein NusB	795,Transcription termination protein NusB
646,hypothetical protein	830,hypothetical protein	- , -	- , -	- , -	1053,hypothetical protein	450,hypothetical protein	- , -	- , -	- , -	- , -	- , -	- , -	1578,hypothetical protein	542,hypothetical protein	811,hypothetical protein	1390,hypothetical protein	- , -	- , -	- , -
647,FIG01119200: hypothetical protein	831,FIG01119200: hypothetical protein	1402,FIG01119200: hypothetical protein	- , -	- , -	1052,FIG01119200: hypothetical protein	451,FIG01119200: hypothetical protein	1712,FIG01119200: hypothetical protein	471,FIG01119200: hypothetical protein	446,FIG01119200: hypothetical protein	410,FIG01119200: hypothetical protein	- , -	445,FIG01119200: hypothetical protein	1577,FIG01119200: hypothetical protein	541,FIG01119200: hypothetical protein	810,FIG01119200: hypothetical protein	1391,FIG01119200: hypothetical protein	- , -	- , -	- , -
648,hypothetical protein	832,hypothetical protein	1403,hypothetical protein	- , -	- , -	- , -	- , -	1713,hypothetical protein	470,hypothetical protein	447,hypothetical protein	411,hypothetical protein	- , -	446,hypothetical protein	1576,hypothetical protein	540,hypothetical protein	809,hypothetical protein	1392,hypothetical protein	- , -	- , -	- , -
649,FIG01116907: hypothetical protein	833,FIG01116907: hypothetical protein	1404,FIG01116907: hypothetical protein	- , -	- , -	1051,FIG01116907: hypothetical protein	452,FIG01116907: hypothetical protein	1714,FIG01116907: hypothetical protein	469,FIG01116907: hypothetical protein	448,FIG01116907: hypothetical protein	412,FIG01116907: hypothetical protein	- , -	447,FIG01116907: hypothetical protein	1575,FIG01116907: hypothetical protein	539,FIG01116907: hypothetical protein	808,FIG01116907: hypothetical protein	1393,FIG01116907: hypothetical protein	- , -	- , -	- , -
650,Mobile element protein	834,Mobile element protein	- , -	1354,Mobile element protein	1384,Mobile element protein	- , -	- , -	- , -	- , -	- , -	- , -	1322,Mobile element protein	- , -	- , -	538,Mobile element protein	- , -	1394,Mobile element protein	1234,Mobile element protein	1228,Mobile element protein	- , -
651,Mobile element protein	835,Mobile element protein	- , -	1355,Mobile element protein	1385,Mobile element protein	- , -	- , -	- , -	- , -	- , -	- , -	1323,Mobile element protein	- , -	- , -	537,Mobile element protein	- , -	1395,Mobile element protein	1235,Mobile element protein	1229,Mobile element protein	- , -
652,Sucrose operon repressor ScrR, LacI family	836,Sucrose operon repressor ScrR, LacI family	1405,Sucrose operon repressor ScrR, LacI family	- , -	- , -	- , -	- , -	1715,Sucrose operon repressor ScrR, LacI family	468,Sucrose operon repressor ScrR, LacI family	449,Sucrose operon repressor ScrR, LacI family	413,Sucrose operon repressor ScrR, LacI family	- , -	448,Sucrose operon repressor ScrR, LacI family	1574,Sucrose operon repressor ScrR, LacI family	536,Sucrose operon repressor ScrR, LacI family	807,Sucrose operon repressor ScrR, LacI family	1396,Sucrose operon repressor ScrR, LacI family	- , -	- , -	- , -
653,Sucrose-6-phosphate hydrolase (EC 3.2.1.B3)	837,Sucrose-6-phosphate hydrolase (EC 3.2.1.B3)	1406,Sucrose-6-phosphate hydrolase (EC 3.2.1.B3)	250,Sucrose-6-phosphate hydrolase (EC 3.2.1.B3)	253,Sucrose-6-phosphate hydrolase (EC 3.2.1.B3)	- , -	453,Sucrose-6-phosphate hydrolase (EC 3.2.1.B3)	1716,Sucrose-6-phosphate hydrolase (EC 3.2.1.B3)	467,Sucrose-6-phosphate hydrolase (EC 3.2.1.B3)	450,Sucrose-6-phosphate hydrolase (EC 3.2.1.B3)	414,Sucrose-6-phosphate hydrolase (EC 3.2.1.B3)	190,Sucrose-6-phosphate hydrolase (EC 3.2.1.B3)	449,Sucrose-6-phosphate hydrolase (EC 3.2.1.B3)	1573,Sucrose-6-phosphate hydrolase (EC 3.2.1.B3)	535,Sucrose-6-phosphate hydrolase (EC 3.2.1.B3)	806,Sucrose-6-phosphate hydrolase (EC 3.2.1.B3)	1397,Sucrose-6-phosphate hydrolase (EC 3.2.1.B3)	429,Sucrose-6-phosphate hydrolase (EC 3.2.1.B3)	427,Sucrose-6-phosphate hydrolase (EC 3.2.1.B3)	797,Sucrose-6-phosphate hydrolase (EC 3.2.1.B3)
654,PTS system, sucrose-specific IIB component / PTS system, sucrose-specific IIC component / PTS system, sucrose-specific IIA component	838,PTS system, sucrose-specific IIB component / PTS system, sucrose-specific IIC component / PTS system, sucrose-specific IIA component	1407,PTS system, sucrose-specific IIB component / PTS system, sucrose-specific IIC component / PTS system, sucrose-specific IIA component	- , -	- , -	- , -	- , -	1717,PTS system, sucrose-specific IIB component / PTS system, sucrose-specific IIC component / PTS system, sucrose-specific IIA component	466,PTS system, sucrose-specific IIB component / PTS system, sucrose-specific IIC component / PTS system, sucrose-specific IIA component	- , -	- , -	- , -	- , -	1572,PTS system, sucrose-specific IIB component / PTS system, sucrose-specific IIC component / PTS system, sucrose-specific IIA component	534,PTS system, sucrose-specific IIB component / PTS system, sucrose-specific IIC component / PTS system, sucrose-specific IIA component	805,PTS system, sucrose-specific IIB component / PTS system, sucrose-specific IIC component / PTS system, sucrose-specific IIA component	1398,PTS system, sucrose-specific IIB component / PTS system, sucrose-specific IIC component / PTS system, sucrose-specific IIA component	- , -	- , -	- , -
655,Secreted Endo-beta-N-acetylglucosaminidase (EndoS)	839,Secreted Endo-beta-N-acetylglucosaminidase (EndoS)	1408,Secreted Endo-beta-N-acetylglucosaminidase (EndoS)	248,Secreted Endo-beta-N-acetylglucosaminidase (EndoS)	255,Secreted Endo-beta-N-acetylglucosaminidase (EndoS)	1046,Secreted Endo-beta-N-acetylglucosaminidase (EndoS)	455,Secreted Endo-beta-N-acetylglucosaminidase (EndoS)	1718,Secreted Endo-beta-N-acetylglucosaminidase (EndoS)	465,Secreted Endo-beta-N-acetylglucosaminidase (EndoS)	452,Secreted Endo-beta-N-acetylglucosaminidase (EndoS)	416,Secreted Endo-beta-N-acetylglucosaminidase (EndoS)	188,Secreted Endo-beta-N-acetylglucosaminidase (EndoS)	451,Secreted Endo-beta-N-acetylglucosaminidase (EndoS)	1571,Secreted Endo-beta-N-acetylglucosaminidase (EndoS)	533,Secreted Endo-beta-N-acetylglucosaminidase (EndoS)	804,Secreted Endo-beta-N-acetylglucosaminidase (EndoS)	1399,Secreted Endo-beta-N-acetylglucosaminidase (EndoS)	431,Secreted Endo-beta-N-acetylglucosaminidase (EndoS)	429,Secreted Endo-beta-N-acetylglucosaminidase (EndoS)	799,Secreted Endo-beta-N-acetylglucosaminidase (EndoS)
656,hypothetical protein	840,hypothetical protein	- , -	- , -	- , -	- , -	- , -	- , -	- , -	- , -	- , -	- , -	- , -	1570,hypothetical protein	532,hypothetical protein	803,hypothetical protein	1400,hypothetical protein	- , -	- , -	- , -
657,Mannose-6-phosphate isomerase	842,Mannose-6-phosphate isomerase	1410,Mannose-6-phosphate isomerase	247,Mannose-6-phosphate isomerase	256,Mannose-6-phosphate isomerase	1045,Mannose-6-phosphate isomerase	457,Mannose-6-phosphate isomerase	1720,Mannose-6-phosphate isomerase	463,Mannose-6-phosphate isomerase	454,Mannose-6-phosphate isomerase	418,Mannose-6-phosphate isomerase	187,Mannose-6-phosphate isomerase	453,Mannose-6-phosphate isomerase	1568,Mannose-6-phosphate isomerase	531,Mannose-6-phosphate isomerase	801,Mannose-6-phosphate isomerase	1401,Mannose-6-phosphate isomerase	432,Mannose-6-phosphate isomerase	430,Mannose-6-phosphate isomerase	801,Mannose-6-phosphate isomerase
658,Protein export cytoplasm protein SecA ATPase RNA helicase (TC 3.A.5.1.1)	843,Protein export cytoplasm protein SecA ATPase RNA helicase (TC 3.A.5.1.1)	1411,Protein export cytoplasm protein SecA ATPase RNA helicase (TC 3.A.5.1.1)	934,Protein export cytoplasm protein SecA ATPase RNA helicase (TC 3.A.5.1.1)	497,Protein export cytoplasm protein SecA ATPase RNA helicase (TC 3.A.5.1.1)	846,Protein export cytoplasm protein SecA ATPase RNA helicase (TC 3.A.5.1.1)	458,Protein export cytoplasm protein SecA ATPase RNA helicase (TC 3.A.5.1.1)	1721,Protein export cytoplasm protein SecA ATPase RNA helicase (TC 3.A.5.1.1)	462,Protein export cytoplasm protein SecA ATPase RNA helicase (TC 3.A.5.1.1)	455,Protein export cytoplasm protein SecA ATPase RNA helicase (TC 3.A.5.1.1)	419,Protein export cytoplasm protein SecA ATPase RNA helicase (TC 3.A.5.1.1)	474,Protein export cytoplasm protein SecA ATPase RNA helicase (TC 3.A.5.1.1)	454,Protein export cytoplasm protein SecA ATPase RNA helicase (TC 3.A.5.1.1)	1567,Protein export cytoplasm protein SecA ATPase RNA helicase (TC 3.A.5.1.1)	530,Protein export cytoplasm protein SecA ATPase RNA helicase (TC 3.A.5.1.1)	800,Protein export cytoplasm protein SecA ATPase RNA helicase (TC 3.A.5.1.1)	1402,Protein export cytoplasm protein SecA ATPase RNA helicase (TC 3.A.5.1.1)	731,Protein export cytoplasm protein SecA ATPase RNA helicase (TC 3.A.5.1.1)	727,Protein export cytoplasm protein SecA ATPase RNA helicase (TC 3.A.5.1.1)	802,Protein export cytoplasm protein SecA ATPase RNA helicase (TC 3.A.5.1.1)
659,Holo-[acyl-carrier protein] synthase	844,Holo-[acyl-carrier protein] synthase	1412,Holo-[acyl-carrier protein] synthase	935,Holo-[acyl-carrier protein] synthase	498,Holo-[acyl-carrier protein] synthase	845,Holo-[acyl-carrier protein] synthase	459,Holo-[acyl-carrier protein] synthase	1722,Holo-[acyl-carrier protein] synthase	461,Holo-[acyl-carrier protein] synthase	456,Holo-[acyl-carrier protein] synthase	420,Holo-[acyl-carrier protein] synthase	475,Holo-[acyl-carrier protein] synthase	455,Holo-[acyl-carrier protein] synthase	1566,Holo-[acyl-carrier protein] synthase	529,Holo-[acyl-carrier protein] synthase	799,Holo-[acyl-carrier protein] synthase	1403,Holo-[acyl-carrier protein] synthase	730,Holo-[acyl-carrier protein] synthase	726,Holo-[acyl-carrier protein] synthase	803,Holo-[acyl-carrier protein] synthase
660,Alanine racemase	845,Alanine racemase	1413,Alanine racemase	936,Alanine racemase	499,Alanine racemase	844,Alanine racemase	460,Alanine racemase	1723,Alanine racemase	460,Alanine racemase	457,Alanine racemase	421,Alanine racemase	476,Alanine racemase	456,Alanine racemase	1565,Alanine racemase	528,Alanine racemase	798,Alanine racemase	1404,Alanine racemase	729,Alanine racemase	725,Alanine racemase	804,Alanine racemase
661,ATP-dependent DNA helicase RecG	846,ATP-dependent DNA helicase RecG	1414,ATP-dependent DNA helicase RecG	937,ATP-dependent DNA helicase RecG	500,ATP-dependent DNA helicase RecG	843,ATP-dependent DNA helicase RecG	461,ATP-dependent DNA helicase RecG	1724,ATP-dependent DNA helicase RecG	459,ATP-dependent DNA helicase RecG	458,ATP-dependent DNA helicase RecG	422,ATP-dependent DNA helicase RecG	477,ATP-dependent DNA helicase RecG	457,ATP-dependent DNA helicase RecG	1564,ATP-dependent DNA helicase RecG	527,ATP-dependent DNA helicase RecG	797,ATP-dependent DNA helicase RecG	1405,ATP-dependent DNA helicase RecG	728,ATP-dependent DNA helicase RecG	724,ATP-dependent DNA helicase RecG	806,ATP-dependent DNA helicase RecG
662,Oxidoreductase, aldo/keto reductase family	847,Oxidoreductase, aldo/keto reductase family	1415,Oxidoreductase, aldo/keto reductase family	938,Oxidoreductase, aldo/keto reductase family	501,Oxidoreductase, aldo/keto reductase family	842,Oxidoreductase, aldo/keto reductase family	462,Oxidoreductase, aldo/keto reductase family	1725,Oxidoreductase, aldo/keto reductase family	458,Oxidoreductase, aldo/keto reductase family	459,Oxidoreductase, aldo/keto reductase family	423,Oxidoreductase, aldo/keto reductase family	478,Oxidoreductase, aldo/keto reductase family	458,Oxidoreductase, aldo/keto reductase family	1563,Oxidoreductase, aldo/keto reductase family	526,Oxidoreductase, aldo/keto reductase family	796,Oxidoreductase, aldo/keto reductase family	1406,Oxidoreductase, aldo/keto reductase family	727,Oxidoreductase, aldo/keto reductase family	723,Oxidoreductase, aldo/keto reductase family	807,Oxidoreductase, aldo/keto reductase family
663,L-asparaginase	848,L-asparaginase	1416,L-asparaginase	939,L-asparaginase	502,L-asparaginase	841,L-asparaginase	463,L-asparaginase	1726,L-asparaginase	457,L-asparaginase	460,L-asparaginase	424,L-asparaginase	479,L-asparaginase	459,L-asparaginase	1562,L-asparaginase	525,L-asparaginase	795,L-asparaginase	1407,L-asparaginase	726,L-asparaginase	722,L-asparaginase	808,L-asparaginase
664,Hydrolase (HAD superfamily)	849,Hydrolase (HAD superfamily)	1417,Hydrolase (HAD superfamily)	940,Hydrolase (HAD superfamily)	503,Hydrolase (HAD superfamily)	840,Hydrolase (HAD superfamily)	464,Hydrolase (HAD superfamily)	1727,Hydrolase (HAD superfamily)	456,Hydrolase (HAD superfamily)	461,Hydrolase (HAD superfamily)	425,Hydrolase (HAD superfamily)	480,Hydrolase (HAD superfamily)	460,Hydrolase (HAD superfamily)	1561,Hydrolase (HAD superfamily)	524,Hydrolase (HAD superfamily)	794,Hydrolase (HAD superfamily)	1408,Hydrolase (HAD superfamily)	725,Hydrolase (HAD superfamily)	721,Hydrolase (HAD superfamily)	809,Hydrolase (HAD superfamily)
665,Universal stress protein family	850,Universal stress protein family	1418,Universal stress protein family	941,Universal stress protein family	504,Universal stress protein family	839,Universal stress protein family	465,Universal stress protein family	1728,Universal stress protein family	455,Universal stress protein family	462,Universal stress protein family	426,Universal stress protein family	481,Universal stress protein family	461,Universal stress protein family	1560,Universal stress protein family	523,Universal stress protein family	793,Universal stress protein family	1409,Universal stress protein family	724,Universal stress protein family	720,Universal stress protein family	810,Universal stress protein family
666,Aspartate aminotransferase	851,Aspartate aminotransferase	1419,Aspartate aminotransferase	942,Aspartate aminotransferase	505,Aspartate aminotransferase	838,Aspartate aminotransferase	466,Aspartate aminotransferase	1729,Aspartate aminotransferase	454,Aspartate aminotransferase	463,Aspartate aminotransferase	427,Aspartate aminotransferase	482,Aspartate aminotransferase	462,Aspartate aminotransferase	1559,Aspartate aminotransferase	522,Aspartate aminotransferase	792,Aspartate aminotransferase	1410,Aspartate aminotransferase	723,Aspartate aminotransferase	719,Aspartate aminotransferase	811,Aspartate aminotransferase
667,GTP-sensing transcriptional pleiotropic repressor codY	852,GTP-sensing transcriptional pleiotropic repressor codY	1420,GTP-sensing transcriptional pleiotropic repressor codY	943,GTP-sensing transcriptional pleiotropic repressor codY	506,GTP-sensing transcriptional pleiotropic repressor codY	837,GTP-sensing transcriptional pleiotropic repressor codY	467,GTP-sensing transcriptional pleiotropic repressor codY	1730,GTP-sensing transcriptional pleiotropic repressor codY	453,GTP-sensing transcriptional pleiotropic repressor codY	464,GTP-sensing transcriptional pleiotropic repressor codY	428,GTP-sensing transcriptional pleiotropic repressor codY	483,GTP-sensing transcriptional pleiotropic repressor codY	463,GTP-sensing transcriptional pleiotropic repressor codY	1558,GTP-sensing transcriptional pleiotropic repressor codY	521,GTP-sensing transcriptional pleiotropic repressor codY	791,GTP-sensing transcriptional pleiotropic repressor codY	1411,GTP-sensing transcriptional pleiotropic repressor codY	722,GTP-sensing transcriptional pleiotropic repressor codY	718,GTP-sensing transcriptional pleiotropic repressor codY	812,GTP-sensing transcriptional pleiotropic repressor codY
668,Nicotinamidase	853,Nicotinamidase	1421,Nicotinamidase	944,Nicotinamidase	507,Nicotinamidase	836,Nicotinamidase	468,Nicotinamidase	1731,Nicotinamidase	452,Nicotinamidase	465,Nicotinamidase	429,Nicotinamidase	484,Nicotinamidase	464,Nicotinamidase	1557,Nicotinamidase	520,Nicotinamidase	790,Nicotinamidase	1412,Nicotinamidase	721,Nicotinamidase	717,Nicotinamidase	813,Nicotinamidase
669,3-hydroxybutyryl-CoA dehydrogenase; 3-hydroxyacyl-CoA dehydrogenase	854,3-hydroxybutyryl-CoA dehydrogenase; 3-hydroxyacyl-CoA dehydrogenase	1422,3-hydroxybutyryl-CoA dehydrogenase; 3-hydroxyacyl-CoA dehydrogenase	- , -	- , -	- , -	- , -	1732,3-hydroxybutyryl-CoA dehydrogenase; 3-hydroxyacyl-CoA dehydrogenase	451,3-hydroxybutyryl-CoA dehydrogenase; 3-hydroxyacyl-CoA dehydrogenase	- , -	- , -	- , -	- , -	- , -	519,3-hydroxybutyryl-CoA dehydrogenase; 3-hydroxyacyl-CoA dehydrogenase	- , -	1413,3-hydroxybutyryl-CoA dehydrogenase; 3-hydroxyacyl-CoA dehydrogenase	- , -	- , -	- , -
670,CBS domain protein, lmo1865 homolog	855,CBS domain protein, lmo1865 homolog	1423,CBS domain protein, lmo1865 homolog	945,CBS domain protein, lmo1865 homolog	508,CBS domain protein, lmo1865 homolog	835,CBS domain protein, lmo1865 homolog	469,CBS domain protein, lmo1865 homolog	1733,CBS domain protein, lmo1865 homolog	450,CBS domain protein, lmo1865 homolog	466,CBS domain protein, lmo1865 homolog	430,CBS domain protein, lmo1865 homolog	485,CBS domain protein, lmo1865 homolog	465,CBS domain protein, lmo1865 homolog	1556,CBS domain protein, lmo1865 homolog	518,CBS domain protein, lmo1865 homolog	789,CBS domain protein, lmo1865 homolog	1414,CBS domain protein, lmo1865 homolog	720,CBS domain protein, lmo1865 homolog	716,CBS domain protein, lmo1865 homolog	814,CBS domain protein, lmo1865 homolog
671,ATP/GTP-binding protein, SA1392 homolog	856,ATP/GTP-binding protein, SA1392 homolog	1424,ATP/GTP-binding protein, SA1392 homolog	946,ATP/GTP-binding protein, SA1392 homolog	509,ATP/GTP-binding protein, SA1392 homolog	834,ATP/GTP-binding protein, SA1392 homolog	470,ATP/GTP-binding protein, SA1392 homolog	1734,ATP/GTP-binding protein, SA1392 homolog	449,ATP/GTP-binding protein, SA1392 homolog	467,ATP/GTP-binding protein, SA1392 homolog	431,ATP/GTP-binding protein, SA1392 homolog	486,ATP/GTP-binding protein, SA1392 homolog	466,ATP/GTP-binding protein, SA1392 homolog	1555,ATP/GTP-binding protein, SA1392 homolog	517,ATP/GTP-binding protein, SA1392 homolog	788,ATP/GTP-binding protein, SA1392 homolog	1415,ATP/GTP-binding protein, SA1392 homolog	719,ATP/GTP-binding protein, SA1392 homolog	715,ATP/GTP-binding protein, SA1392 homolog	815,ATP/GTP-binding protein, SA1392 homolog
672,Pyruvate,phosphate dikinase	857,Pyruvate,phosphate dikinase	1425,Pyruvate,phosphate dikinase	947,Pyruvate,phosphate dikinase	510,Pyruvate,phosphate dikinase	833,Pyruvate,phosphate dikinase	471,Pyruvate,phosphate dikinase	1735,Pyruvate,phosphate dikinase	448,Pyruvate,phosphate dikinase	468,Pyruvate,phosphate dikinase	432,Pyruvate,phosphate dikinase	487,Pyruvate,phosphate dikinase	467,Pyruvate,phosphate dikinase	1554,Pyruvate,phosphate dikinase	516,Pyruvate,phosphate dikinase	787,Pyruvate,phosphate dikinase	1416,Pyruvate,phosphate dikinase	718,Pyruvate,phosphate dikinase	714,Pyruvate,phosphate dikinase	816,Pyruvate,phosphate dikinase
673,Aspartyl-tRNA(Asn) amidotransferase subunit C @ Glutamyl-tRNA(Gln) amidotransferase subunit C	858,Aspartyl-tRNA(Asn) amidotransferase subunit C @ Glutamyl-tRNA(Gln) amidotransferase subunit C	1426,Aspartyl-tRNA(Asn) amidotransferase subunit C @ Glutamyl-tRNA(Gln) amidotransferase subunit C	948,Aspartyl-tRNA(Asn) amidotransferase subunit C @ Glutamyl-tRNA(Gln) amidotransferase subunit C	511,Aspartyl-tRNA(Asn) amidotransferase subunit C @ Glutamyl-tRNA(Gln) amidotransferase subunit C	832,Aspartyl-tRNA(Asn) amidotransferase subunit C @ Glutamyl-tRNA(Gln) amidotransferase subunit C	472,Aspartyl-tRNA(Asn) amidotransferase subunit C @ Glutamyl-tRNA(Gln) amidotransferase subunit C	1550,Aspartyl-tRNA(Asn) amidotransferase subunit C @ Glutamyl-tRNA(Gln) amidotransferase subunit C	1647,Aspartyl-tRNA(Asn) amidotransferase subunit C @ Glutamyl-tRNA(Gln) amidotransferase subunit C	469,Aspartyl-tRNA(Asn) amidotransferase subunit C @ Glutamyl-tRNA(Gln) amidotransferase subunit C	433,Aspartyl-tRNA(Asn) amidotransferase subunit C @ Glutamyl-tRNA(Gln) amidotransferase subunit C	488,Aspartyl-tRNA(Asn) amidotransferase subunit C @ Glutamyl-tRNA(Gln) amidotransferase subunit C	468,Aspartyl-tRNA(Asn) amidotransferase subunit C @ Glutamyl-tRNA(Gln) amidotransferase subunit C	1553,Aspartyl-tRNA(Asn) amidotransferase subunit C @ Glutamyl-tRNA(Gln) amidotransferase subunit C	515,Aspartyl-tRNA(Asn) amidotransferase subunit C @ Glutamyl-tRNA(Gln) amidotransferase subunit C	786,Aspartyl-tRNA(Asn) amidotransferase subunit C @ Glutamyl-tRNA(Gln) amidotransferase subunit C	1417,Aspartyl-tRNA(Asn) amidotransferase subunit C @ Glutamyl-tRNA(Gln) amidotransferase subunit C	717,Aspartyl-tRNA(Asn) amidotransferase subunit C @ Glutamyl-tRNA(Gln) amidotransferase subunit C	713,Aspartyl-tRNA(Asn) amidotransferase subunit C @ Glutamyl-tRNA(Gln) amidotransferase subunit C	1226,Aspartyl-tRNA(Asn) amidotransferase subunit C @ Glutamyl-tRNA(Gln) amidotransferase subunit C
674,Aspartyl-tRNA(Asn) amidotransferase subunit A @ Glutamyl-tRNA(Gln) amidotransferase subunit A	859,Aspartyl-tRNA(Asn) amidotransferase subunit A @ Glutamyl-tRNA(Gln) amidotransferase subunit A	1427,Aspartyl-tRNA(Asn) amidotransferase subunit A @ Glutamyl-tRNA(Gln) amidotransferase subunit A	949,Aspartyl-tRNA(Asn) amidotransferase subunit A @ Glutamyl-tRNA(Gln) amidotransferase subunit A	512,Aspartyl-tRNA(Asn) amidotransferase subunit A @ Glutamyl-tRNA(Gln) amidotransferase subunit A	831,Aspartyl-tRNA(Asn) amidotransferase subunit A @ Glutamyl-tRNA(Gln) amidotransferase subunit A	473,Aspartyl-tRNA(Asn) amidotransferase subunit A @ Glutamyl-tRNA(Gln) amidotransferase subunit A	1549,Aspartyl-tRNA(Asn) amidotransferase subunit A @ Glutamyl-tRNA(Gln) amidotransferase subunit A	1646,Aspartyl-tRNA(Asn) amidotransferase subunit A @ Glutamyl-tRNA(Gln) amidotransferase subunit A	470,Aspartyl-tRNA(Asn) amidotransferase subunit A @ Glutamyl-tRNA(Gln) amidotransferase subunit A	434,Aspartyl-tRNA(Asn) amidotransferase subunit A @ Glutamyl-tRNA(Gln) amidotransferase subunit A	489,Aspartyl-tRNA(Asn) amidotransferase subunit A @ Glutamyl-tRNA(Gln) amidotransferase subunit A	469,Aspartyl-tRNA(Asn) amidotransferase subunit A @ Glutamyl-tRNA(Gln) amidotransferase subunit A	1552,Aspartyl-tRNA(Asn) amidotransferase subunit A @ Glutamyl-tRNA(Gln) amidotransferase subunit A	514,Aspartyl-tRNA(Asn) amidotransferase subunit A @ Glutamyl-tRNA(Gln) amidotransferase subunit A	785,Aspartyl-tRNA(Asn) amidotransferase subunit A @ Glutamyl-tRNA(Gln) amidotransferase subunit A	1418,Aspartyl-tRNA(Asn) amidotransferase subunit A @ Glutamyl-tRNA(Gln) amidotransferase subunit A	716,Aspartyl-tRNA(Asn) amidotransferase subunit A @ Glutamyl-tRNA(Gln) amidotransferase subunit A	712,Aspartyl-tRNA(Asn) amidotransferase subunit A @ Glutamyl-tRNA(Gln) amidotransferase subunit A	1225,Aspartyl-tRNA(Asn) amidotransferase subunit A @ Glutamyl-tRNA(Gln) amidotransferase subunit A
675,Aspartyl-tRNA(Asn) amidotransferase subunit B @ Glutamyl-tRNA(Gln) amidotransferase subunit B	860,Aspartyl-tRNA(Asn) amidotransferase subunit B @ Glutamyl-tRNA(Gln) amidotransferase subunit B	1428,Aspartyl-tRNA(Asn) amidotransferase subunit B @ Glutamyl-tRNA(Gln) amidotransferase subunit B	950,Aspartyl-tRNA(Asn) amidotransferase subunit B @ Glutamyl-tRNA(Gln) amidotransferase subunit B	513,Aspartyl-tRNA(Asn) amidotransferase subunit B @ Glutamyl-tRNA(Gln) amidotransferase subunit B	830,Aspartyl-tRNA(Asn) amidotransferase subunit B @ Glutamyl-tRNA(Gln) amidotransferase subunit B	474,Aspartyl-tRNA(Asn) amidotransferase subunit B @ Glutamyl-tRNA(Gln) amidotransferase subunit B	1548,Aspartyl-tRNA(Asn) amidotransferase subunit B @ Glutamyl-tRNA(Gln) amidotransferase subunit B	1645,Aspartyl-tRNA(Asn) amidotransferase subunit B @ Glutamyl-tRNA(Gln) amidotransferase subunit B	471,Aspartyl-tRNA(Asn) amidotransferase subunit B @ Glutamyl-tRNA(Gln) amidotransferase subunit B	435,Aspartyl-tRNA(Asn) amidotransferase subunit B @ Glutamyl-tRNA(Gln) amidotransferase subunit B	490,Aspartyl-tRNA(Asn) amidotransferase subunit B @ Glutamyl-tRNA(Gln) amidotransferase subunit B	470,Aspartyl-tRNA(Asn) amidotransferase subunit B @ Glutamyl-tRNA(Gln) amidotransferase subunit B	1551,Aspartyl-tRNA(Asn) amidotransferase subunit B @ Glutamyl-tRNA(Gln) amidotransferase subunit B	513,Aspartyl-tRNA(Asn) amidotransferase subunit B @ Glutamyl-tRNA(Gln) amidotransferase subunit B	784,Aspartyl-tRNA(Asn) amidotransferase subunit B @ Glutamyl-tRNA(Gln) amidotransferase subunit B	1419,Aspartyl-tRNA(Asn) amidotransferase subunit B @ Glutamyl-tRNA(Gln) amidotransferase subunit B	715,Aspartyl-tRNA(Asn) amidotransferase subunit B @ Glutamyl-tRNA(Gln) amidotransferase subunit B	711,Aspartyl-tRNA(Asn) amidotransferase subunit B @ Glutamyl-tRNA(Gln) amidotransferase subunit B	1224,Aspartyl-tRNA(Asn) amidotransferase subunit B @ Glutamyl-tRNA(Gln) amidotransferase subunit B
676,Permease of the drug/metabolite transporter (DMT) superfamily	861,Permease of the drug/metabolite transporter (DMT) superfamily	1429,Permease of the drug/metabolite transporter (DMT) superfamily	951,Permease of the drug/metabolite transporter (DMT) superfamily	514,Permease of the drug/metabolite transporter (DMT) superfamily	829,Permease of the drug/metabolite transporter (DMT) superfamily	475,Permease of the drug/metabolite transporter (DMT) superfamily	104,Permease of the drug/metabolite transporter (DMT) superfamily	1,Permease of the drug/metabolite transporter (DMT) superfamily	472,Permease of the drug/metabolite transporter (DMT) superfamily	649,Permease of the drug/metabolite transporter (DMT) superfamily	491,Permease of the drug/metabolite transporter (DMT) superfamily	646,Permease of the drug/metabolite transporter (DMT) superfamily	1550,Permease of the drug/metabolite transporter (DMT) superfamily	512,Permease of the drug/metabolite transporter (DMT) superfamily	783,Permease of the drug/metabolite transporter (DMT) superfamily	1420,Permease of the drug/metabolite transporter (DMT) superfamily	714,Permease of the drug/metabolite transporter (DMT) superfamily	710,Permease of the drug/metabolite transporter (DMT) superfamily	1223,Permease of the drug/metabolite transporter (DMT) superfamily
677,Integral membrane protein	862,Integral membrane protein	1430,Integral membrane protein	952,Integral membrane protein	515,Integral membrane protein	828,Integral membrane protein	476,Integral membrane protein	103,Integral membrane protein	2,Integral membrane protein	473,Integral membrane protein	648,Integral membrane protein	492,Integral membrane protein	645,Integral membrane protein	1549,Integral membrane protein	511,Integral membrane protein	782,Integral membrane protein	1421,Integral membrane protein	713,Integral membrane protein	709,Integral membrane protein	1222,Integral membrane protein
678,Hypothetical, related to broad specificity phosphatases COG0406	864,Hypothetical, related to broad specificity phosphatases COG0406	1431,Hypothetical, related to broad specificity phosphatases COG0406	953,Hypothetical, related to broad specificity phosphatases COG0406	516,Hypothetical, related to broad specificity phosphatases COG0406	228,Hypothetical, related to broad specificity phosphatases COG0406	477,Hypothetical, related to broad specificity phosphatases COG0406	102,Hypothetical, related to broad specificity phosphatases COG0406	3,Hypothetical, related to broad specificity phosphatases COG0406	474,Hypothetical, related to broad specificity phosphatases COG0406	647,Hypothetical, related to broad specificity phosphatases COG0406	493,Hypothetical, related to broad specificity phosphatases COG0406	644,Hypothetical, related to broad specificity phosphatases COG0406	1548,Hypothetical, related to broad specificity phosphatases COG0406	510,Hypothetical, related to broad specificity phosphatases COG0406	781,Hypothetical, related to broad specificity phosphatases COG0406	1422,Hypothetical, related to broad specificity phosphatases COG0406	712,Hypothetical, related to broad specificity phosphatases COG0406	708,Hypothetical, related to broad specificity phosphatases COG0406	1221,Hypothetical, related to broad specificity phosphatases COG0406
679,putative N-acetyl-muramidase	865,putative N-acetyl-muramidase	1432,putative N-acetyl-muramidase	954,putative N-acetyl-muramidase	517,putative N-acetyl-muramidase	229,putative N-acetyl-muramidase	478,putative N-acetyl-muramidase	101,putative N-acetyl-muramidase	4,putative N-acetyl-muramidase	475,putative N-acetyl-muramidase	646,putative N-acetyl-muramidase	494,putative N-acetyl-muramidase	643,putative N-acetyl-muramidase	1547,putative N-acetyl-muramidase	509,putative N-acetyl-muramidase	780,putative N-acetyl-muramidase	1423,putative N-acetyl-muramidase	711,putative N-acetyl-muramidase	707,putative N-acetyl-muramidase	1220,putative N-acetyl-muramidase
[truncated: 2,924 more rows]
